# Supplementary material for: Synthesis, characterization and study of electrochemical applicability of novel asymmetrically substituted 1,3-dialkyl-1,2,3-benzotriazolium salts for supercapacitor fabrication
Source: Royal Society of Chemistry journal article supplement (doi:10.1039/d3ra01958f), 2023-01-01
Supplement: d3ra01958f1.pdf [file d3ra01958f1.pdf]

## Supplementary material

# Synthesis, characterization and study of electrochemical applicability of novel asymmetrically substituted 1,3-dialkyl-1,2,3-benzotriazolium salts for supercapacitor fabrication

*Anjitha Satheesh<sup>a</sup>, Punnakkal Navaneeth<sup>a,b</sup>, Punathil Vasu Suneesh<sup>a,b</sup>, Sarathchandran C<sup>c</sup> Elango Kandasamy<sup>a,\*</sup>*

*<sup>a</sup>Department of Sciences, Amrita School of Physical Sciences Coimbatore, Amrita Vishwa Vidyapeetham, 641112, India*

*<sup>b</sup>Amrita Biosensor Research Lab, Amrita School of Physical Sciences Coimbatore, Amrita Vishwa Vidyapeetham, 641112, India.*

*<sup>c</sup>Department of Sciences, Amrita School of Engineering, Chennai, Amrita Vishwa Vidyapeetham, India.*

## S1. List of Abbreviations

- |            |   |                              |
|------------|---|------------------------------|
| 1) 1propBT | - | 1-propyl-1,2,3-benzotriazole |
| 2) 1butBT  | - | 1-butyl-1,2,3-benzotriazole  |
| 3) 1pentBT | - | 1-pentyl-1,2,3-benzotriazole |
| 4) 1hexBT  | - | 1-hexyl-1,2,3-benzotriazole  |

- 5) 2propBT - 2-propyl-1,2,3-benzotriazole
- 6) 2butBT - 2-butylyl-1,2,3-benzotriazole
- 7) 2pentBT - 2-pentyl-1,2,3-benzotriazole
- 8) 2hexBT - 2-hexyl-1,2,3-benzotriazole
- 9) 1but3propBTBr - 1-butyl-3-propyl-1,2,3-benzotriazolium bromide
- 10) 1but3propBTBF<sub>4</sub> - 1-butyl-3-propyl-1,2,3-benzotriazolium tetrafluoroborate
- 11) 1but3propBTPF<sub>6</sub> - 1-butyl-3-propyl-1,2,3-benzotriazolium hexafluorophosphate
- 12) 1but3pentBTBr - 1-butyl-3-pentyl-1,2,3-benzotriazolium bromide
- 13) 1but3pentBTBF<sub>4</sub> - 1-butyl-3-pentyl-1,2,3-benzotriazolium tetrafluoroborate
- 14) 1but3pentBTPF<sub>6</sub> - 1-butyl-3-pentyl-1,2,3-benzotriazolium hexafluorophosphate
- 15) 1but3hexBTBr - 1-butyl-3-hexyl-1,2,3-benzotriazolium bromide
- 16) 1but3hexBTBF<sub>4</sub> - 1-butyl-3-hexyl-1,2,3-benzotriazolium tetrafluoroborate
- 17) 1but3hexBTPF<sub>6</sub> - 1-butyl-3-hexyl-1,2,3-benzotriazolium hexafluorophosphate
- 18) 1pent3propBTBr - 1-pentyl-3-propyl-1,2,3-benzotriazolium bromide
- 19) 1pent3propBTBF<sub>4</sub> - 1-pentyl-3-propyl-1,2,3-benzotriazolium tetrafluoroborate
- 20) 1pent3propBTPF<sub>6</sub> - 1-pentyl-3-propyl-1,2,3-benzotriazolium hexafluorophosphate
- 21) 1hex3propBTBr - 1-hexyl-3-propyl-1,2,3-benzotriazolium bromide
- 22) 1hex3propBTBF<sub>4</sub> - 1-hexyl-3-propyl-1,2,3-benzotriazolium tetrafluoroborate
- 23) 1hex3propBTPF<sub>6</sub> - 1-hexyl-3-propyl-1,2,3-benzotriazolium hexafluorophosphate
- 24) 1hex3pentBTBr - 1-hexyl-3-pentyl-1,2,3-benzotriazolium bromide
- 25) 1hex3pentBTBF<sub>4</sub> - 1-hexyl-3-pentyl-1,2,3-benzotriazolium tetrafluoroborate
- 26) 1hex3pentBTPF<sub>6</sub> - 1-hexyl-3-pentyl-1,2,3-benzotriazolium hexafluorophosphate
- 27) IL - Ionic liquid

- 28) CV - Cyclic voltammetry
- 29) TGA - Thermogravimetric analysis
- 30) DSC - Differential scanning calorimetry
- 31) EIS - Electrochemical impedance spectroscopy
- 32) GCD - Galvanostatic charge-discharge
- 33) PVDF-HFP - Poly(vinylidene fluoride-co-hexa-fluoropropylene)
- 34) ILGPE - Ionic liquid incorporated gel electrolyte
- 35) EDLC - Electrochemical double layer supercapacitors
- 36) PTFE - Polytetrafluoroethylene
- 37) LED - Light-emitting diode

## S2. NMR details of 1,3-dialkyl-1,2,3-benzotriazolium salt

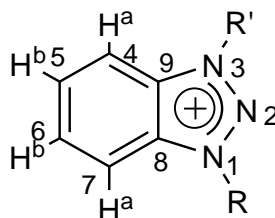

**Figure S1.**Numbering of 1,3-dialkyl-1,2,3-benzotriazolium salt

**Table S1.** Important  $^1\text{H}$  NMR and  $^{13}\text{C}$  NMR ppm values of 1,3-dialkyl-1,2,3-benzotriazolium salt

| SL. No | Compounds | H <sup>a</sup> (ppm) | H <sup>b</sup> (ppm) | H <sup>c</sup> (ppm) | H <sup>d</sup> (ppm) | C-8 (ppm) | C-9 (ppm) | C-7 (ppm) | C-4 (ppm) | C-6 (ppm) | C-5 (ppm) |
|--------|-----------|----------------------|----------------------|----------------------|----------------------|-----------|-----------|-----------|-----------|-----------|-----------|
| 1      | 1propBT   | 8.04                 | 7.53                 | 7.45                 | 7.34                 | 145.87    | 132.94    | 127.07    | 123.7     | 117.6     | 109.4     |
| 2      | 2propBT   | 7.86                 | 7.86                 | 7.33                 | 7.33                 | 144.23    | 144.23    | 126       | 126       | 117.87    | 117.87    |
| 3      | 1butBT    | 8.04                 | 7.53                 | 7.45                 | 7.34                 | 145.89    | 132.88    | 127.03    | 123.67    | 119.77    | 109.37    |
| 4      | 2butBT    | 7.86                 | 7.86                 | 7.34                 | 7.34                 | 144.24    | 144.24    | 126.05    | 126.05    | 117.43    | 117.43    |

|    |                                 |      |      |      |      |        |        |        |        |        |        |
|----|---------------------------------|------|------|------|------|--------|--------|--------|--------|--------|--------|
| 5  | 1pentBT                         | 8.11 | 7.93 | 7.59 | 7.54 | 150.44 | 138    | 132.16 | 128.89 | 124.23 | 115.59 |
| 6  | 2pentBT                         | 7.98 | 7.98 | 7.45 | 7.45 | 148.95 | 148.95 | 131.12 | 131.12 | 122.89 | 122.89 |
| 7  | 1hexBT                          | 8.12 | 7.92 | 7.58 | 7.44 | 150.49 | 137.98 | 132.05 | 128.78 | 124.26 | 115.39 |
| 8  | 2hexBT                          | 7.96 | 7.26 | 7.44 | 7.44 | 148.92 | 148.92 | 131.18 | 131.18 | 122.89 | 122.89 |
| 9  | 1but3propBT<br>Br               | 8.69 | 8.69 | 7.99 | 7.99 | 134.68 | 134.68 | 131.48 | 131.48 | 114.22 | 114.22 |
| 10 | 1but3propBT<br>BF <sub>4</sub>  | 8.41 | 8.41 | 7.93 | 7.93 | 132.9  | 132.9  | 129.84 | 129.84 | 112.18 | 112.18 |
| 11 | 1but3propBT<br>PF <sub>6</sub>  | 8.06 | 8.06 | 7.97 | 7.97 | 134.77 | 134.77 | 131.66 | 131.66 | 113.42 | 113.42 |
| 12 | 1but3pentBT<br>Br               | 8.62 | 8.62 | 7.96 | 7.96 | 134.57 | 134.57 | 131.61 | 131.61 | 114.29 | 114.29 |
| 13 | 1but3pentBT<br>BF <sub>4</sub>  | 8.41 | 8.41 | 7.93 | 7.93 | 132.87 | 132.87 | 129.86 | 129.86 | 112.16 | 112.16 |
| 14 | 1but3pentBT<br>F <sub>6</sub>   | 8.11 | 8.11 | 7.87 | 7.87 | 134.74 | 134.74 | 131.69 | 139.69 | 113.5  | 113.5  |
| 15 | 1but3hexBT<br>Br                | 8.67 | 8.67 | 7.96 | 7.96 | 134.65 | 134.65 | 131.52 | 131.52 | 114.44 | 114.44 |
| 16 | 1but3hexBT<br>F <sub>4</sub>    | 8.13 | 8.13 | 7.65 | 7.65 | 134.53 | 134.53 | 131.5  | 131.5  | 113.81 | 113.81 |
| 17 | 1but3hexBT<br>F <sub>6</sub>    | 8.07 | 8.07 | 7.86 | 7.86 | 134.73 | 134.73 | 131.67 | 131.67 | 113.4  | 113.4  |
| 18 | 1pent3propBT<br>Br              | 8.62 | 8.62 | 7.97 | 7.97 | 134.55 | 134.55 | 131.56 | 131.56 | 114.2  | 114.2  |
| 19 | 1pent3propBT<br>BF <sub>4</sub> | 7.92 | 7.92 | 7.41 | 7.41 | 134.57 | 134.57 | 131.53 | 131.53 | 113.9  | 113.9  |
| 20 | 1pent3propBT<br>PF <sub>6</sub> | 8.09 | 8.09 | 7.87 | 7.87 | 134.76 | 134.76 | 131.66 | 131.66 | 113.45 | 113.45 |
| 21 | 1hex3propBT<br>Br               | 8.02 | 8.02 | 7.3  | 7.3  | 134.4  | 134.4  | 131.41 | 131.41 | 114.17 | 114.17 |
| 22 | 1hex3propBT<br>BF <sub>4</sub>  | 8.39 | 8.39 | 7.92 | 7.92 | 134.7  | 134.7  | 131.64 | 131.64 | 113.93 | 113.93 |
| 23 | 1hex3propBT<br>PF <sub>6</sub>  | 8.09 | 8.09 | 7.86 | 7.86 | 133.25 | 133.25 | 131.66 | 131.66 | 113.45 | 113.45 |



|    |                                |      |      |      |      |        |        |        |        |        |        |
|----|--------------------------------|------|------|------|------|--------|--------|--------|--------|--------|--------|
| 24 | 1hex3pentBT<br>Br              | 8.68 | 8.68 | 7.99 | 7.99 | 134.94 | 134.94 | 131.44 | 131.44 | 114.15 | 114.15 |
| 25 | 1hex3pentBT<br>BF <sub>4</sub> | 8.1  | 8.1  | 7.61 | 7.61 | 138    | 138    | 129.83 | 129.83 | 112.17 | 112.17 |
| 26 | 1hex3pentBT<br>PF <sub>6</sub> | 8.06 | 8.06 | 7.86 | 7.86 | 134.74 | 134.74 | 131.6  | 131.6  | 113.32 | 113.32 |

### 1-propyl-1,2,3-benzotriazole(1propBT)

<sup>1</sup>H-NMR (CDCl<sub>3</sub>, 400 MHz): 8.04 (dt, 1H, Ar), 7.53 (dt, 1H, Ar), 7.45 (m, 1H, Ar), 7.34(m, 1H, Ar), 4.58 (t, 2H, CH<sub>2</sub>-CH<sub>2</sub>-CH<sub>3</sub>), 2.02 (m, 2H, CH<sub>2</sub>-CH<sub>2</sub>-CH<sub>3</sub>), 0.94 (t, 3H, -CH<sub>2</sub>-CH<sub>2</sub>-CH<sub>3</sub>). <sup>13</sup>C NMR (CDCl<sub>3</sub>, 100 MHz): 145.87(C-8), 132.94(C-9), 127.07(C-7), 123.70(C-4), 119.60(C-6), 109.40(C-5), 49.68(CH<sub>2</sub>-CH<sub>2</sub>-CH<sub>3</sub>), 23.05(CH<sub>2</sub>-CH<sub>2</sub>-CH<sub>3</sub>), 11.22(CH<sub>2</sub>-CH<sub>2</sub>-CH<sub>3</sub>).

### 2-propyl-1,2,3-benzotriazole(2propBT)

<sup>1</sup>H-NMR (CDCl<sub>3</sub>, 400 MHz): 7.86 (dd, 2H, Ar), 7.33 (dd, 2H, Ar), 4.67 (t, 2H, CH<sub>2</sub>-CH<sub>2</sub>-CH<sub>3</sub>), 2.12 (m, 2H, CH<sub>2</sub>-CH<sub>2</sub>-CH<sub>3</sub>), 0.94 (t, 3H, -CH<sub>2</sub>-CH<sub>2</sub>-CH<sub>3</sub>). <sup>13</sup>C NMR (CDCl<sub>3</sub>, 100 MHz): 144.23(C-8, C-9), 126(C-7, C-4), 117.87(C-5, C-6), 58.01 (CH<sub>2</sub>-CH<sub>2</sub>-CH<sub>3</sub>), 23.41(CH<sub>2</sub>-CH<sub>2</sub>-CH<sub>3</sub>), 10.84(CH<sub>2</sub>-CH<sub>2</sub>-CH<sub>3</sub>).

### 1-butyl -1,2,3-benzotriazole(1butBT)

<sup>1</sup>H-NMR (CDCl<sub>3</sub>, 400 MHz): 8.04 (dt, 1H, Ar), 7.53 (dt, 1H, Ar), 7.45 (m, 1H, Ar), 7.34 (m, 1H, Ar), 4.62 (t, 2H, CH<sub>2</sub>-CH<sub>2</sub>-CH<sub>2</sub>-CH<sub>3</sub>), 1.97 (m, 2H, CH<sub>2</sub>-CH<sub>2</sub>-CH<sub>2</sub>-CH<sub>3</sub>), 1.31 (m, 3H, CH<sub>2</sub>-CH<sub>2</sub>-CH<sub>2</sub>-CH<sub>3</sub>), 0.93 (t, 3H, CH<sub>2</sub>-CH<sub>2</sub>-CH<sub>2</sub>-CH<sub>3</sub>). <sup>13</sup>C NMR (CDCl<sub>3</sub>, 100 MHz): 145.89 (C-8), 132.88 (C-9), 127.03 (C-7), 123.67 (C-4), 119.77 (C-6), 109.37 (C-5), 47.83 (CH<sub>2</sub>-CH<sub>2</sub>-CH<sub>2</sub>-CH<sub>3</sub>), 31.58 (CH<sub>2</sub>-CH<sub>2</sub>-CH<sub>2</sub>-CH<sub>3</sub>), 19.58 (CH<sub>2</sub>-CH<sub>2</sub>-CH<sub>2</sub>-CH<sub>3</sub>), 13.22 (CH<sub>2</sub>-CH<sub>2</sub>-CH<sub>2</sub>-CH<sub>3</sub>).

### 2-butyl-1,2,3-benzotriazole(2butBT)

<sup>1</sup>H-NMR (CDCl<sub>3</sub>, 400 MHz): 7.86 (dd, 2H, Ar), 7.34 (dd, 2H, Ar), 4.71 (t, 2H, CH<sub>2</sub>-CH<sub>2</sub>-CH<sub>2</sub>-CH<sub>3</sub>), 2.09 (m, 2H, CH<sub>2</sub>-CH<sub>2</sub>-CH<sub>2</sub>-CH<sub>3</sub>), 1.36 (m, 2H, CH<sub>2</sub>-CH<sub>2</sub>-CH<sub>2</sub>-CH<sub>3</sub>), 0.95 (t, 3H, CH<sub>2</sub>-CH<sub>2</sub>-CH<sub>2</sub>-CH<sub>3</sub>).

$^{13}\text{C}$  NMR ( $\text{CDCl}_3$ , 100 MHz):  $^{13}\text{C}$  NMR ( $\text{CDCl}_3$ , 100 MHz): 144.24 (C-8,C-9), 126.05 (C-7, C-4), 117.43 (C-5, C-6), 56.24 ( $\text{CH}_2\text{-CH}_2\text{-CH}_2\text{-CH}_3$ ), 31.97 ( $\text{CH}_2\text{-CH}_2\text{-CH}_2\text{-CH}_3$ ), 19.73 ( $\text{CH}_2\text{-CH}_2\text{-CH}_2\text{-CH}_3$ ), 13.43 ( $\text{CH}_2\text{-CH}_2\text{-CH}_2\text{-CH}_3$ ).

#### **1-pentyl-1,2,3-benzotriazole(1pentBT)**

$^1\text{H}$ -NMR ( $\text{CDCl}_3$ , 400 MHz): 8.11 (dt, 1H, Ar), 7.93 (dt, 1H, Ar), 7.59 (m, 1H, Ar) ,7.54 (m, 1H, Ar), 4.76 (t, 2H,  $\text{CH}_2\text{-CH}_2\text{-CH}_2\text{-CH}_2\text{-CH}_3$ ), 1.95 (m, 2H,  $\text{CH}_2\text{-CH}_2\text{-CH}_2\text{-CH}_2\text{-CH}_3$ ), 1.26 (m, 3H,  $\text{CH}_2\text{-CH}_2\text{-CH}_2\text{-CH}_2\text{-CH}_3$ ), 0.82 (t, 3H,  $\text{CH}_2\text{-CH}_2\text{-CH}_2\text{-CH}_2\text{-CH}_3$ ).  $^{13}\text{C}$  NMR ( $\text{CDCl}_3$ , 100 MHz): 150.44 (C-8), 138 (C-9), 132.16 (C-7), 128.89 (C-4), 124.28 (C-6), 115.59 (C-5), 52.58 ( $\text{CH}_2\text{-CH}_2\text{-CH}_2\text{-CH}_2\text{CH}_3$ ), 34.12 ( $\text{CH}_2\text{-CH}_2\text{-CH}_2\text{-CH}_2\text{-CH}_3$ ), 33.38 ( $\text{CH}_2\text{-CH}_2\text{-CH}_2\text{-CH}_2\text{-CH}_3$ ), 26.73 ( $\text{CH}_2\text{-CH}_2\text{-CH}_2\text{-CH}_2\text{-CH}_3$ ), 18.78 ( $\text{CH}_2\text{-CH}_2\text{-CH}_2\text{-CH}_2\text{-CH}_3$ ).

#### **2-pentyl-1,2,3-benzotriazole(2pentBT)**

$^1\text{H}$ -NMR ( $\text{CDCl}_3$ , 400 MHz): 7.98 (dd, 2H, Ar), 7.45 (dd, 2H, Ar), 4.78 (t, 2H,  $\text{CH}_2\text{-CH}_2\text{-CH}_2\text{-CH}_2\text{-CH}_3$ ), 2.07 (m, 2H,  $\text{CH}_2\text{-CH}_2\text{-CH}_2\text{-CH}_2\text{-CH}_3$ ), 1.28 (m, 4H,  $\text{CH}_2\text{-CH}_2\text{-CH}_2\text{-CH}_2\text{-CH}_3$ ), 0.83 (t, 3H,  $\text{CH}_2\text{-CH}_2\text{-CH}_2\text{-CH}_3$ ).  $^{13}\text{C}$  NMR ( $\text{CDCl}_3$ , 100 MHz):148.95 (C-8, C-9), 131.12 (C-7, C-4), 122.89 (C-5, C-6), 61.08 ( $\text{CH}_2\text{-CH}_2\text{-CH}_2\text{-CH}_2\text{-CH}_3$ ), 34.31 ( $\text{CH}_2\text{-CH}_2\text{-CH}_2\text{-CH}_2\text{-CH}_3$ ), 33.29 ( $\text{CH}_2\text{-CH}_2\text{-CH}_2\text{-CH}_2\text{-CH}_3$ ), 26.72 ( $\text{CH}_2\text{-CH}_2\text{-CH}_2\text{-CH}_2\text{-CH}_3$ ), 18.69 ( $\text{CH}_2\text{-CH}_2\text{-CH}_2\text{-CH}_2\text{-CH}_3$ ).

#### **1-hexyl-1,2,3-benzotriazole(1hexBT)**

$^1\text{H}$ -NMR ( $\text{CDCl}_3$ , 400 MHz): 8.12 (dt, 1H, Ar), 7.92 (dt, 1H, Ar), 7.58 (m, 1H, Ar) ,7.44 (m, 1H, Ar), 4.77 (t, 2H,  $\text{CH}_2\text{-CH}_2\text{-CH}_2\text{-CH}_2\text{-CH}_2\text{-CH}_3$ ), 1.95 (m, 2H,  $\text{CH}_2\text{-CH}_2\text{-CH}_2\text{-CH}_2\text{-CH}_2\text{-CH}_3$ ), 1.23 (m, 4H,  $\text{CH}_2\text{-CH}_2\text{-CH}_2\text{-CH}_2\text{-CH}_2\text{-CH}_3$ ), 0.80 (t, 3H,  $\text{CH}_2\text{-CH}_2\text{-CH}_2\text{-CH}_2\text{-CH}_2\text{-CH}_3$ ).  $^{13}\text{C}$  NMR ( $\text{CDCl}_3$ , 100 MHz):150.49 (C-8), 137.98 (C-9), 132.05 (C-7), 128.78 (C-4)124.26 (C-5), 115.39 (C-6), 52.60 ( $\text{CH}_2\text{-CH}_2\text{-CH}_2\text{-CH}_2\text{-CH}_3$ ), 35.79 ( $\text{CH}_2\text{-CH}_2\text{-CH}_2\text{-CH}_2\text{-CH}_2\text{-CH}_3$ ), 34.39 ( $\text{CH}_2\text{-CH}_2\text{-CH}_2\text{-CH}_2\text{-CH}_2\text{-CH}_3$ ),

30.89 (CH<sub>2</sub>-CH<sub>2</sub>-CH<sub>2</sub>-CH<sub>2</sub>-CH<sub>2</sub>-CH<sub>3</sub>), 27.06 (CH<sub>2</sub>-CH<sub>2</sub>-CH<sub>2</sub>-CH<sub>2</sub>-CH<sub>2</sub>-CH<sub>3</sub>), 18.74 (CH<sub>2</sub>-CH<sub>2</sub>-CH<sub>2</sub>-CH<sub>2</sub>-CH<sub>2</sub>-CH<sub>3</sub>).

**2-hexyl-1,2,3-benzotriazole(2hexBT)**

<sup>1</sup>H-NMR (CDCl<sub>3</sub>, 400 MHz): 7.96 (dd, 2H, Ar), 7.44 (dd, 2H, Ar), 4.77 (t, 2H, CH<sub>2</sub>-CH<sub>2</sub>-CH<sub>2</sub>-CH<sub>2</sub>-CH<sub>2</sub>-CH<sub>3</sub>), 2.05 (m, 2H, CH<sub>2</sub>-CH<sub>2</sub>-CH<sub>2</sub>-CH<sub>2</sub>-CH<sub>2</sub>-CH<sub>3</sub>), 1.25 (m, 4H, CH<sub>2</sub>-CH<sub>2</sub>-CH<sub>2</sub>-CH<sub>2</sub>-CH<sub>2</sub>-CH<sub>3</sub>), 0.82 (t, 3H, CH<sub>2</sub>-CH<sub>2</sub>-CH<sub>2</sub>-CH<sub>3</sub>). <sup>13</sup>C NMR (CDCl<sub>3</sub>, 100 MHz):148.92 (C-8, C-9), 131.18 (C-7, C-4), 122.89 (C-5, C-6), 61.10 (CH<sub>2</sub>-CH<sub>2</sub>-CH<sub>2</sub>-CH<sub>2</sub>-CH<sub>2</sub>-CH<sub>3</sub>), 35.79 (CH<sub>2</sub>-CH<sub>2</sub>-CH<sub>2</sub>-CH<sub>2</sub>-CH<sub>2</sub>-CH<sub>3</sub>), 34.55 (CH<sub>2</sub>-CH<sub>2</sub>-CH<sub>2</sub>-CH<sub>2</sub>-CH<sub>2</sub>-CH<sub>3</sub>), 30.80 (CH<sub>2</sub>-CH<sub>2</sub>-CH<sub>2</sub>-CH<sub>2</sub>-CH<sub>2</sub>-CH<sub>3</sub>), 27.06 (CH<sub>2</sub>-CH<sub>2</sub>-CH<sub>2</sub>-CH<sub>2</sub>-CH<sub>2</sub>-CH<sub>3</sub>), 18.82 (CH<sub>2</sub>-CH<sub>2</sub>-CH<sub>2</sub>-CH<sub>2</sub>-CH<sub>2</sub>-CH<sub>3</sub>).

**1-butyl-3-propyl-1,2,3-benzotriazolium bromide(1but3propBTBr)**

<sup>1</sup>H-NMR (CDCl<sub>3</sub>, 400 MHz):8.69 (m, 2H, Ar), 7.99 (m, 2H,Ar), 5.26 (m, 4H, CH<sub>2</sub>-CH<sub>2</sub>-CH<sub>3</sub>, CH<sub>2</sub>-CH<sub>2</sub>-CH<sub>2</sub>-CH<sub>3</sub>), 2.20 (m, 2H,CH<sub>2</sub>-CH<sub>2</sub>-CH<sub>3</sub>), 1.48 (m, 4H,CH<sub>2</sub>-CH<sub>2</sub>-CH<sub>2</sub>-CH<sub>3</sub>), 1.07 (t, 1H,CH<sub>2</sub>-CH<sub>2</sub>-CH<sub>3</sub>), 0.99 (t, 1H,CH<sub>2</sub>-CH<sub>2</sub>-CH<sub>2</sub>-CH<sub>3</sub>). <sup>13</sup>C NMR (CDCl<sub>3</sub>, 100 MHz): 134.68(C-8, C-9), 131.48 (C-4, C-7), 114.22(C-5, C-6), 53.91 (CH<sub>2</sub>-CH<sub>2</sub>-CH<sub>3</sub>), 52.29 (CH<sub>2</sub>-CH<sub>2</sub>-CH<sub>2</sub>-CH<sub>3</sub>), 30.77 (CH<sub>2</sub>-CH<sub>2</sub>-CH<sub>3</sub>), 22.51 (CH<sub>2</sub>-CH<sub>2</sub>-CH<sub>2</sub>-CH<sub>3</sub>), 19.26 (CH<sub>2</sub>-CH<sub>2</sub>-CH<sub>2</sub>-CH<sub>3</sub>), 13.11(CH<sub>2</sub>-CH<sub>2</sub>-CH<sub>3</sub>), 10.70(CH<sub>2</sub>-CH<sub>2</sub>-CH<sub>2</sub>-CH<sub>3</sub>).

**1-butyl-3-propyl-1,2,3-benzotriazolium tetrafluoroborate(1but3propBTBF<sub>4</sub>)**

<sup>1</sup>H-NMR (CDCl<sub>3</sub>, 400 MHz):8.41 (m, 2H, Ar), 7.93 (m, 2H, Ar), 5.08 (m, 4H, CH<sub>2</sub>-CH<sub>2</sub>-CH<sub>3</sub>, CH<sub>2</sub>-CH<sub>2</sub>-CH<sub>2</sub>-CH<sub>3</sub>), 2.17 (m, 2H,CH<sub>2</sub>-CH<sub>2</sub>-CH<sub>3</sub>), 1.45 (m, 4H,CH<sub>2</sub>-CH<sub>2</sub>-CH<sub>2</sub>-CH<sub>3</sub>), 1.05 (t, 1H,CH<sub>2</sub>-CH<sub>2</sub>-CH<sub>3</sub>), 0.98 (t, 1H, CH<sub>2</sub>-CH<sub>2</sub>-CH<sub>2</sub>-CH<sub>3</sub>). <sup>13</sup>C NMR (CDCl<sub>3</sub>, 100 MHz): 132.90 (C-8, C-9), 129.84 (C-4, C-7),112.18 (C-5, C-6), 51.91(CH<sub>2</sub>-CH<sub>2</sub>-CH<sub>3</sub>), 50.26 (CH<sub>2</sub>-CH<sub>2</sub>-CH<sub>2</sub>-CH<sub>3</sub>), 29.04 (CH<sub>2</sub>-CH<sub>2</sub>-CH<sub>3</sub>), 20.78 (CH<sub>2</sub>-CH<sub>2</sub>-CH<sub>2</sub>-CH<sub>3</sub>), 17.67 (CH<sub>2</sub>-CH<sub>2</sub>-CH<sub>2</sub>-CH<sub>3</sub>), 11.48 (CH<sub>2</sub>-CH<sub>2</sub>-CH<sub>3</sub>), 9.02 (CH<sub>2</sub>-CH<sub>2</sub>-CH<sub>2</sub>-CH<sub>3</sub>).

**1-butyl-3-propyl-1,2,3-benzotriazolium hexafluorophosphate(1but3propBTPF<sub>6</sub>)**

<sup>1</sup>H-NMR (CDCl<sub>3</sub>, 400 MHz): 8.06 (m, 1H, Ar), 7.97 (m, 2H, Ar), 4.88 (s, 4H, CH<sub>2</sub>-CH<sub>2</sub>-CH<sub>3</sub>, CH<sub>2</sub>-CH<sub>2</sub>-CH<sub>2</sub>-CH<sub>3</sub>), 2.13 (m, 2H, CH<sub>2</sub>-CH<sub>2</sub>-CH<sub>3</sub>), 1.53 (m, 4H, CH<sub>2</sub>-CH<sub>2</sub>-CH<sub>2</sub>-CH<sub>3</sub>), 1.01 (t, 1H, CH<sub>2</sub>-CH<sub>2</sub>-CH<sub>3</sub>), 0.98 (t, 1H, CH<sub>2</sub>-CH<sub>2</sub>-CH<sub>2</sub>-CH<sub>3</sub>). <sup>13</sup>C NMR (CDCl<sub>3</sub>, 100 MHz): 134.77 (C-8, C-9), 131.66 (C-4, C-7), 113.42 (C-5, C-6), 53.53 (CH<sub>2</sub>-CH<sub>2</sub>-CH<sub>3</sub>), 51.85 (CH<sub>2</sub>-CH<sub>2</sub>-CH<sub>2</sub>-CH<sub>3</sub>), 30.74 (CH<sub>2</sub>-CH<sub>2</sub>-CH<sub>3</sub>), 22.46 (CH<sub>2</sub>-CH<sub>2</sub>-CH<sub>2</sub>-CH<sub>3</sub>), 19.65 (CH<sub>2</sub>-CH<sub>2</sub>-CH<sub>2</sub>-CH<sub>3</sub>), 13.29 (CH<sub>2</sub>-CH<sub>2</sub>-CH<sub>3</sub>), 10.90 (CH<sub>2</sub>-CH<sub>2</sub>-CH<sub>2</sub>-CH<sub>3</sub>).

### **1-hexyl-3-propyl-1,2,3-benzotriazolium bromide(1hex3propBTBr)**

<sup>1</sup>H-NMR (CDCl<sub>3</sub>, 400 MHz): 8.01 (m, 2H, Ar), 7.29 (m, 2H, Ar), 4.57 (t, 4H, CH<sub>2</sub>-CH<sub>2</sub>-CH<sub>3</sub>, CH<sub>2</sub>-CH<sub>2</sub>-CH<sub>2</sub>-CH<sub>2</sub>-CH<sub>3</sub>), 1.51 (m, 4H, CH<sub>2</sub>-CH<sub>2</sub>-CH<sub>3</sub>, CH<sub>2</sub>-CH<sub>2</sub>-CH<sub>2</sub>-CH<sub>2</sub>-CH<sub>2</sub>-CH<sub>3</sub>), 0.64 (m, 6H, CH<sub>2</sub>-CH<sub>2</sub>-CH<sub>2</sub>-CH<sub>2</sub>-CH<sub>3</sub>), 0.37 (CH<sub>2</sub>-CH<sub>2</sub>-CH<sub>3</sub>) 0.16 (CH<sub>2</sub>-CH<sub>2</sub>-CH<sub>2</sub>-CH<sub>2</sub>-CH<sub>2</sub>-CH<sub>3</sub>). <sup>13</sup>C NMR (CDCl<sub>3</sub>, 100 MHz): 134.40 (C-8, C-9), 131.41 (C-4, C-7), 114.17 (C-5, C-6), 53.83 (CH<sub>2</sub>-CH<sub>2</sub>-CH<sub>2</sub>-CH<sub>2</sub>-CH<sub>2</sub>-CH<sub>3</sub>), 52.46 (CH<sub>2</sub>-CH<sub>2</sub>-CH<sub>3</sub>), 30.52 (CH<sub>2</sub>-CH<sub>2</sub>-CH<sub>2</sub>-CH<sub>2</sub>-CH<sub>2</sub>-CH<sub>3</sub>), 28.72 (CH<sub>2</sub>-CH<sub>2</sub>-CH<sub>2</sub>-CH<sub>2</sub>-CH<sub>2</sub>-CH<sub>3</sub>), 25.50 (CH<sub>2</sub>-CH<sub>2</sub>-CH<sub>2</sub>-CH<sub>2</sub>-CH<sub>2</sub>-CH<sub>3</sub>), 22.46 (CH<sub>2</sub>-CH<sub>2</sub>-CH<sub>3</sub>), 22.14 (CH<sub>2</sub>-CH<sub>2</sub>-CH<sub>2</sub>-CH<sub>2</sub>-CH<sub>2</sub>-CH<sub>3</sub>), 13.50 (CH<sub>2</sub>-CH<sub>2</sub>-CH<sub>3</sub>), 10.61 (CH<sub>2</sub>-CH<sub>2</sub>-CH<sub>2</sub>-CH<sub>2</sub>-CH<sub>2</sub>-CH<sub>3</sub>).

### **1-hexyl-3-propyl-1,2,3-benzotriazolium tetrafluoroborate(1hex3propBTBF<sub>4</sub>)**

<sup>1</sup>H-NMR (CDCl<sub>3</sub>, 400 MHz): 8.39 (m, 2H, Ar), 7.92 (m, 2H, Ar), 5.07 (m, 4H, CH<sub>2</sub>-CH<sub>2</sub>-CH<sub>2</sub>-CH<sub>2</sub>-CH<sub>2</sub>-CH<sub>3</sub>, CH<sub>2</sub>-CH<sub>2</sub>-CH<sub>3</sub>), 2.17 (m, 2H, CH<sub>2</sub>-CH<sub>2</sub>-CH<sub>2</sub>-CH<sub>2</sub>-CH<sub>2</sub>-CH<sub>3</sub>), 1.33 (m, 4H, CH<sub>2</sub>-CH<sub>2</sub>-CH<sub>2</sub>-CH<sub>2</sub>-CH<sub>2</sub>-CH<sub>3</sub>), 1.04 (t, 3H, , CH<sub>2</sub>-CH<sub>2</sub>-CH<sub>3</sub>), 0.86 (t, 3H, CH<sub>2</sub>-CH<sub>2</sub>-CH<sub>2</sub>-CH<sub>2</sub>-CH<sub>2</sub>-CH<sub>3</sub>). <sup>13</sup>C NMR (CDCl<sub>3</sub>, 100 MHz): 134.7 (C-8, C-9), 131.64 (C-4, C-7), 113.93 (C-5, C-6), 53.72 (CH<sub>2</sub>-CH<sub>2</sub>-CH<sub>3</sub>), 52.32 (CH<sub>2</sub>-CH<sub>2</sub>-CH<sub>2</sub>-CH<sub>2</sub>-CH<sub>2</sub>-CH<sub>3</sub>), 30.82 (CH<sub>2</sub>-CH<sub>2</sub>-CH<sub>2</sub>-CH<sub>2</sub>-CH<sub>2</sub>-CH<sub>3</sub>), 28.87 (CH<sub>2</sub>-CH<sub>2</sub>-CH<sub>2</sub>-CH<sub>2</sub>-CH<sub>2</sub>-CH<sub>3</sub>), 25.82 (CH<sub>2</sub>-CH<sub>2</sub>-CH<sub>2</sub>-CH<sub>2</sub>-CH<sub>2</sub>-CH<sub>3</sub>), 22.57 (CH<sub>2</sub>-CH<sub>2</sub>-CH<sub>3</sub>), 22.16 (CH<sub>2</sub>-CH<sub>2</sub>-CH<sub>2</sub>-CH<sub>2</sub>-CH<sub>2</sub>-CH<sub>3</sub>), 13.77 (CH<sub>2</sub>-CH<sub>2</sub>-CH<sub>3</sub>), 10.80 (CH<sub>2</sub>-CH<sub>2</sub>-CH<sub>2</sub>-CH<sub>2</sub>-CH<sub>2</sub>-CH<sub>3</sub>).

### **1-hexyl-3-propyl-1,2,3-benzotriazolium hexafluorophosphate(1hex3propBTPF<sub>6</sub>)**

<sup>1</sup>H-NMR (CDCl<sub>3</sub>, 400 MHz): 8.09 (m, 2H, Ar), 7.86 (m, 2H, Ar), 4.90 (m, 4H, CH<sub>2</sub>-CH<sub>2</sub>-CH<sub>2</sub>-CH<sub>2</sub>-CH<sub>2</sub>-CH<sub>3</sub>, CH<sub>2</sub>-CH<sub>2</sub>-CH<sub>3</sub>), 2.13 (m, 2H, CH<sub>2</sub>-CH<sub>2</sub>-CH<sub>2</sub>-CH<sub>2</sub>-CH<sub>2</sub>-CH<sub>3</sub>), 1.32 (m, 4H, CH<sub>2</sub>-CH<sub>2</sub>-CH<sub>2</sub>-CH<sub>2</sub>-CH<sub>2</sub>-CH<sub>3</sub>), 1.02 (t, 3H, CH<sub>2</sub>-CH<sub>2</sub>-CH<sub>3</sub>), 0.86 (t, 3H, CH<sub>2</sub>-CH<sub>2</sub>-CH<sub>2</sub>-CH<sub>2</sub>-CH<sub>2</sub>-CH<sub>3</sub>). <sup>13</sup>C NMR (CDCl<sub>3</sub>, 100 MHz): 133.25 (C-8, C-9), 131.66 (C-4, C-7), 113.45 (C-5, C-6), 53.45 (CH<sub>2</sub>-CH<sub>2</sub>-CH<sub>3</sub>, CH<sub>2</sub>-CH<sub>2</sub>-CH<sub>2</sub>-CH<sub>2</sub>-CH<sub>2</sub>-CH<sub>3</sub>), 52.03 (CH<sub>2</sub>-CH<sub>2</sub>-CH<sub>2</sub>-CH<sub>2</sub>-CH<sub>2</sub>-CH<sub>3</sub>), 30.91 (CH<sub>2</sub>-CH<sub>2</sub>-CH<sub>2</sub>-CH<sub>2</sub>-CH<sub>2</sub>-CH<sub>3</sub>), 28.79 (CH<sub>2</sub>-CH<sub>2</sub>-CH<sub>2</sub>-CH<sub>2</sub>-CH<sub>2</sub>-CH<sub>3</sub>), 25.94 (CH<sub>2</sub>-CH<sub>2</sub>-CH<sub>3</sub>), 22.46 (CH<sub>2</sub>-CH<sub>2</sub>-CH<sub>2</sub>-CH<sub>2</sub>-CH<sub>2</sub>-CH<sub>3</sub>), 13.85 (CH<sub>2</sub>-CH<sub>2</sub>-CH<sub>3</sub>), 10.82 (CH<sub>2</sub>-CH<sub>2</sub>-CH<sub>2</sub>-CH<sub>2</sub>-CH<sub>2</sub>-CH<sub>3</sub>).

### **1-butyl-3-hexyl-1,2,3-benzotriazolium bromide(1but3hexBTBr)**

<sup>1</sup>H-NMR (CDCl<sub>3</sub>, 400 MHz):8.67 (m, 2H,Ar), 7.96 (m, 2H,Ar), 5.27 (m, 4H, CH<sub>2</sub>-CH<sub>2</sub>-CH<sub>2</sub>-CH<sub>3</sub>,CH<sub>2</sub>-CH<sub>2</sub>-CH<sub>2</sub>-CH<sub>2</sub>-CH<sub>3</sub>), 2.16 (m, 4H,CH<sub>2</sub>-CH<sub>2</sub>-CH<sub>2</sub>-CH<sub>3</sub>), 1.39 (m, 8H, CH<sub>2</sub>-CH<sub>2</sub>-CH<sub>2</sub>-CH<sub>2</sub>-CH<sub>2</sub>-CH<sub>3</sub>), 0.99 (t, 3H, CH<sub>2</sub>-CH<sub>2</sub>-CH<sub>2</sub>-CH<sub>3</sub>), 0.86 (t, 3H, CH<sub>2</sub>-CH<sub>2</sub>-CH<sub>2</sub>-CH<sub>2</sub>-CH<sub>2</sub>-CH<sub>2</sub>-CH<sub>3</sub>). <sup>13</sup>C NMR (CDCl<sub>3</sub>, 100 MHz): 134.65 (C-8, C-9), 131.52 (C-4, C-7), 114.44 (C-5, C-6), 52.72 (CH<sub>2</sub>-CH<sub>2</sub>-CH<sub>2</sub>-CH<sub>3</sub>), 52.48 (CH<sub>2</sub>-CH<sub>2</sub>-CH<sub>2</sub>-CH<sub>2</sub>-CH<sub>2</sub>-CH<sub>3</sub>), 30.99 (CH<sub>2</sub>-CH<sub>2</sub>-CH<sub>2</sub>-CH<sub>3</sub>), 30.76 (CH<sub>2</sub>-CH<sub>2</sub>-CH<sub>2</sub>-CH<sub>2</sub>-CH<sub>2</sub>-CH<sub>3</sub>), 28.99 (CH<sub>2</sub>-CH<sub>2</sub>-CH<sub>2</sub>-CH<sub>2</sub>-CH<sub>2</sub>-CH<sub>3</sub>), 25.76 (CH<sub>2</sub>-CH<sub>2</sub>-CH<sub>2</sub>-CH<sub>2</sub>-CH<sub>2</sub>-CH<sub>3</sub>), 22.08 (CH<sub>2</sub>-CH<sub>2</sub>-CH<sub>2</sub>-CH<sub>3</sub>), 19.43 (CH<sub>2</sub>-CH<sub>2</sub>-CH<sub>2</sub>-CH<sub>2</sub>-CH<sub>2</sub>-CH<sub>3</sub>),13.69 (CH<sub>2</sub>-CH<sub>2</sub>-CH<sub>2</sub>-CH<sub>3</sub>), 13.23 (CH<sub>2</sub>-CH<sub>2</sub>-CH<sub>2</sub>-CH<sub>2</sub>-CH<sub>2</sub>-CH<sub>3</sub>).

### **1-butyl-3-hexyl-1,2,3-benzotriazolium tetrafluoroborate(1but3hexBTBF<sub>4</sub>)**

<sup>1</sup>H-NMR (CDCl<sub>3</sub>, 400 MHz):8.13 (m, 2H,Ar), 7.65 (m, 2H,Ar), 4.82 (m, 4H, CH<sub>2</sub>-CH<sub>2</sub>-CH<sub>2</sub>-CH<sub>3</sub>,CH<sub>2</sub>-CH<sub>2</sub>-CH<sub>2</sub>-CH<sub>2</sub>-CH<sub>3</sub>), 1.86 (m, 4H,CH<sub>2</sub>-CH<sub>2</sub>-CH<sub>2</sub>-CH<sub>3</sub>), 1.08 (m, 8H, CH<sub>2</sub>-CH<sub>2</sub>-CH<sub>2</sub>-CH<sub>2</sub>-CH<sub>2</sub>-CH<sub>3</sub>), 0.69 (t, 3H, CH<sub>2</sub>-CH<sub>2</sub>-CH<sub>2</sub>-CH<sub>3</sub>), 0.57 (t, 3H, CH<sub>2</sub>-CH<sub>2</sub>-CH<sub>2</sub>-CH<sub>2</sub>-CH<sub>2</sub>-CH<sub>2</sub>-CH<sub>3</sub>). <sup>13</sup>C NMR (CDCl<sub>3</sub>, 100 MHz): 134.53 (C-8, C-9), 131.50 (C-4, C-7), 113.81 (C-5, C-6), 52.13 (CH<sub>2</sub>-CH<sub>2</sub>-CH<sub>2</sub>-CH<sub>3</sub>), 51.88 (CH<sub>2</sub>-CH<sub>2</sub>-CH<sub>2</sub>-CH<sub>2</sub>-CH<sub>2</sub>-CH<sub>3</sub>), 30.70 (CH<sub>2</sub>-CH<sub>2</sub>-CH<sub>2</sub>-CH<sub>3</sub>, CH<sub>2</sub>-CH<sub>2</sub>-CH<sub>2</sub>-CH<sub>2</sub>-CH<sub>2</sub>-CH<sub>3</sub>), 28.71 (CH<sub>2</sub>-CH<sub>2</sub>-CH<sub>2</sub>-CH<sub>2</sub>-CH<sub>2</sub>-CH<sub>3</sub>), 25.66 (CH<sub>2</sub>-CH<sub>2</sub>-CH<sub>2</sub>-CH<sub>2</sub>-CH<sub>2</sub>-CH<sub>3</sub>), 22.03 (CH<sub>2</sub>-CH<sub>2</sub>-

*CH*<sub>2</sub>-*CH*<sub>3</sub>), 19.31 (*CH*<sub>2</sub>-*CH*<sub>2</sub>-*CH*<sub>2</sub>-*CH*<sub>2</sub>-*CH*<sub>2</sub>-*CH*<sub>3</sub>), 13.64 (*CH*<sub>2</sub>-*CH*<sub>2</sub>-*CH*<sub>2</sub>-*CH*<sub>3</sub>), 13.13 (*CH*<sub>2</sub>-*CH*<sub>2</sub>-*CH*<sub>2</sub>-*CH*<sub>2</sub>-*CH*<sub>2</sub>-*CH*<sub>3</sub>).

**1-butyl-3-hexyl-1,2,3-benzotriazolium hexafluorophosphate(1but3hexBTPF<sub>6</sub>)**

<sup>1</sup>H-NMR (CDCl<sub>3</sub>, 400 MHz): 8.07 (m, 2H, Ar), 7.86 (m, 2H, Ar), 4.89 (m, 4H, *CH*<sub>2</sub>-*CH*<sub>2</sub>-*CH*<sub>2</sub>-*CH*<sub>3</sub>, *CH*<sub>2</sub>-*CH*<sub>2</sub>-*CH*<sub>2</sub>-*CH*<sub>2</sub>-*CH*<sub>3</sub>), 2.10 (m, 2H, *CH*<sub>2</sub>-*CH*<sub>2</sub>-*CH*<sub>2</sub>-*CH*<sub>3</sub>), 1.36 (m, 8H, *CH*<sub>2</sub>-*CH*<sub>2</sub>-*CH*<sub>2</sub>-*CH*<sub>2</sub>-*CH*<sub>2</sub>-*CH*<sub>3</sub>), 0.97 (t, 1H, *CH*<sub>2</sub>-*CH*<sub>2</sub>-*CH*<sub>2</sub>-*CH*<sub>3</sub>), 0.86 (m, 1H, *CH*<sub>2</sub>-*CH*<sub>2</sub>-*CH*<sub>2</sub>-*CH*<sub>2</sub>-*CH*<sub>2</sub>-*CH*<sub>3</sub>). <sup>13</sup>C NMR (CDCl<sub>3</sub>, 100 MHz): 134.73(C-8, C-9), 131.67 (C-4, C-7), 113.40 (C-5, C-6), 52.00 (*CH*<sub>2</sub>-*CH*<sub>2</sub>-*CH*<sub>2</sub>-*CH*<sub>3</sub>), 51.75 (*CH*<sub>2</sub>-*CH*<sub>2</sub>-*CH*<sub>2</sub>-*CH*<sub>2</sub>-*CH*<sub>2</sub>-*CH*<sub>3</sub>), 30.81 (*CH*<sub>2</sub>-*CH*<sub>2</sub>-*CH*<sub>2</sub>-*CH*<sub>3</sub>, *CH*<sub>2</sub>-*CH*<sub>2</sub>-*CH*<sub>2</sub>-*CH*<sub>2</sub>-*CH*<sub>2</sub>-*CH*<sub>3</sub>), 28.77 (*CH*<sub>2</sub>-*CH*<sub>2</sub>-*CH*<sub>2</sub>-*CH*<sub>2</sub>-*CH*<sub>2</sub>-*CH*<sub>3</sub>), 25.93 (*CH*<sub>2</sub>-*CH*<sub>2</sub>-*CH*<sub>2</sub>-*CH*<sub>2</sub>-*CH*<sub>2</sub>-*CH*<sub>3</sub>), 22.27 (*CH*<sub>2</sub>-*CH*<sub>2</sub>-*CH*<sub>2</sub>-*CH*<sub>3</sub>), 19.56 (*CH*<sub>2</sub>-*CH*<sub>2</sub>-*CH*<sub>2</sub>-*CH*<sub>2</sub>-*CH*<sub>2</sub>-*CH*<sub>3</sub>), 13.85 (*CH*<sub>2</sub>-*CH*<sub>2</sub>-*CH*<sub>2</sub>-*CH*<sub>3</sub>), 13.27 (*CH*<sub>2</sub>-*CH*<sub>2</sub>-*CH*<sub>2</sub>-*CH*<sub>2</sub>-*CH*<sub>3</sub>).

**1-hexyl-3-pentyl -1,2,3-benzotriazolium bromide(1hex3pentBTBr)**

<sup>1</sup>H-NMR (CDCl<sub>3</sub>, 400 MHz): 8.00 (m, 2H, Ar), 7.29 (m, 2H, Ar), 4.59 (m, 4H, *CH*<sub>2</sub>-*CH*<sub>2</sub>-*CH*<sub>2</sub>-*CH*<sub>2</sub>-*CH*<sub>2</sub>-*CH*<sub>3</sub>, *CH*<sub>2</sub>-*CH*<sub>2</sub>-*CH*<sub>2</sub>-*CH*<sub>2</sub>-*CH*<sub>3</sub>), 1.49 (m, 4H, *CH*<sub>2</sub>-*CH*<sub>2</sub>-*CH*<sub>2</sub>-*CH*<sub>2</sub>-*CH*<sub>3</sub>), 0.64 (m, 6H, *CH*<sub>2</sub>-*CH*<sub>2</sub>-*CH*<sub>2</sub>-*CH*<sub>2</sub>-*CH*<sub>3</sub>), 0.17 (m, 6H, *CH*<sub>2</sub>-*CH*<sub>2</sub>-*CH*<sub>2</sub>-*CH*<sub>2</sub>-*CH*<sub>3</sub>, *CH*<sub>2</sub>-*CH*<sub>2</sub>-*CH*<sub>2</sub>-*CH*<sub>2</sub>-*CH*<sub>2</sub>-*CH*<sub>3</sub>). <sup>13</sup>C NMR (CDCl<sub>3</sub>, 100 MHz): 134.94 (C-8, C-9), 131.44 (C-4, C-7), 114.15 (C-5, C-6), 52.92 (*CH*<sub>2</sub>-*CH*<sub>2</sub>-*CH*<sub>2</sub>-*CH*<sub>2</sub>-*CH*<sub>3</sub>), 30.69 (*CH*<sub>2</sub>-*CH*<sub>2</sub>-*CH*<sub>2</sub>-*CH*<sub>2</sub>-*CH*<sub>2</sub>-*CH*<sub>3</sub>), 28.89 (*CH*<sub>2</sub>-*CH*<sub>2</sub>-*CH*<sub>2</sub>-*CH*<sub>2</sub>-*CH*<sub>3</sub>), 28.64 (*CH*<sub>2</sub>-*CH*<sub>2</sub>-*CH*<sub>2</sub>-*CH*<sub>2</sub>-*CH*<sub>2</sub>-*CH*<sub>3</sub>), 28.07 (*CH*<sub>2</sub>-*CH*<sub>2</sub>-*CH*<sub>2</sub>-*CH*<sub>2</sub>-*CH*<sub>2</sub>-*CH*<sub>3</sub>), 25.68 (*CH*<sub>2</sub>-*CH*<sub>2</sub>-*CH*<sub>2</sub>-*CH*<sub>2</sub>-*CH*<sub>3</sub>), 22 (*CH*<sub>2</sub>-*CH*<sub>2</sub>-*CH*<sub>2</sub>-*CH*<sub>2</sub>-*CH*<sub>3</sub>), 21.70 (*CH*<sub>2</sub>-*CH*<sub>2</sub>-*CH*<sub>2</sub>-*CH*<sub>2</sub>-*CH*<sub>2</sub>-*CH*<sub>3</sub>), 13.56 (*CH*<sub>2</sub>-*CH*<sub>2</sub>-*CH*<sub>2</sub>-*CH*<sub>2</sub>-*CH*<sub>3</sub>).

**1-hexyl-3-pentyl-1,2,3-benzotriazolium tetrafluoroborate(1hex3pentBTBF<sub>4</sub>)**

<sup>1</sup>H-NMR (CDCl<sub>3</sub>, 400 MHz): 8.10 (m, 2H, Ar), 7.61 (m, 2H, Ar), 4.79 (m, 4H, *CH*<sub>2</sub>-*CH*<sub>2</sub>-*CH*<sub>2</sub>-*CH*<sub>2</sub>-*CH*<sub>2</sub>-*CH*<sub>3</sub>, *CH*<sub>2</sub>-*CH*<sub>2</sub>-*CH*<sub>2</sub>-*CH*<sub>2</sub>-*CH*<sub>3</sub>), 1.84 (m, 4H, *CH*<sub>2</sub>-*CH*<sub>2</sub>-*CH*<sub>2</sub>-*CH*<sub>2</sub>-*CH*<sub>3</sub>), 1.02 (m, 6H, *CH*<sub>2</sub>-*CH*<sub>2</sub>-*CH*<sub>2</sub>-*CH*<sub>2</sub>-*CH*<sub>2</sub>-*CH*<sub>3</sub>), 0.55 (t, 6H, *CH*<sub>2</sub>-*CH*<sub>2</sub>-*CH*<sub>2</sub>-*CH*<sub>2</sub>-*CH*<sub>3</sub>, *CH*<sub>2</sub>-*CH*<sub>2</sub>-*CH*<sub>2</sub>-*CH*<sub>2</sub>-*CH*<sub>2</sub>-*CH*<sub>3</sub>). <sup>13</sup>C NMR

(CDCl<sub>3</sub>, 100 MHz): 138.00 (C-8, C-9), 129.83 (C-4, C-7), 112.17 (C-5, C-6), 50.53 (CH<sub>2</sub>-CH<sub>2</sub>-CH<sub>2</sub>-CH<sub>2</sub>-CH<sub>3</sub>), 29.12 (CH<sub>2</sub>-CH<sub>2</sub>-CH<sub>2</sub>-CH<sub>2</sub>-CH<sub>2</sub>-CH<sub>3</sub>), 27.12 (CH<sub>2</sub>-CH<sub>2</sub>-CH<sub>2</sub>-CH<sub>2</sub>-CH<sub>3</sub>), 26.87(CH<sub>2</sub>-CH<sub>2</sub>-CH<sub>2</sub>-CH<sub>2</sub>-CH<sub>2</sub>-CH<sub>3</sub>), 26.46 (CH<sub>2</sub>-CH<sub>2</sub>-CH<sub>2</sub>-CH<sub>2</sub>-CH<sub>2</sub>-CH<sub>3</sub>), 24.08 (CH<sub>2</sub>-CH<sub>2</sub>-CH<sub>2</sub>-CH<sub>2</sub>-CH<sub>3</sub>), 20.44 (CH<sub>2</sub>-CH<sub>2</sub>-CH<sub>2</sub>-CH<sub>2</sub>-CH<sub>2</sub>-CH<sub>3</sub>), 20.12 (CH<sub>2</sub>-CH<sub>2</sub>-CH<sub>2</sub>-CH<sub>2</sub>-CH<sub>3</sub>), 11.99 (CH<sub>2</sub>-CH<sub>2</sub>-CH<sub>2</sub>-CH<sub>2</sub>-CH<sub>2</sub>-CH<sub>3</sub>).

**1-hexyl-3-pentyl-1,2,3-benzotriazolium hexafluorophosphate(1hex3pentBTPF<sub>6</sub>)**

<sup>1</sup>H-NMR (CDCl<sub>3</sub>, 400 MHz): 8.06 (m, 2H,Ar), 7.86 (m, 2H, Ar), 4.90 (m, 4H, CH<sub>2</sub>-CH<sub>2</sub>-CH<sub>2</sub>-CH<sub>2</sub>-CH<sub>2</sub>-CH<sub>3</sub>, CH<sub>2</sub>-CH<sub>2</sub>-CH<sub>2</sub>-CH<sub>2</sub>-CH<sub>3</sub>), 2.11 (m, 4H, CH<sub>2</sub>-CH<sub>2</sub>-CH<sub>2</sub>-CH<sub>2</sub>-CH<sub>3</sub>), 1.34 (m, 6H, CH<sub>2</sub>-CH<sub>2</sub>-CH<sub>2</sub>-CH<sub>2</sub>-CH<sub>2</sub>-CH<sub>3</sub>), 0.87 (t, 3H, CH<sub>2</sub>-CH<sub>2</sub>-CH<sub>2</sub>-CH<sub>2</sub>-CH<sub>3</sub>, CH<sub>2</sub>-CH<sub>2</sub>-CH<sub>2</sub>-CH<sub>2</sub>-CH<sub>2</sub>-CH<sub>3</sub>). <sup>13</sup>C NMR (CDCl<sub>3</sub>, 100 MHz): 134.74 (C-8, C-9), 131.60 (C-4, C-7), 113.32 (C-5, C-6), 51.98 (CH<sub>2</sub>-CH<sub>2</sub>-CH<sub>2</sub>-CH<sub>2</sub>-CH<sub>3</sub>, CH<sub>2</sub>-CH<sub>2</sub>-CH<sub>2</sub>-CH<sub>2</sub>-CH<sub>2</sub>-CH<sub>3</sub>), 30.90 (CH<sub>2</sub>-CH<sub>2</sub>-CH<sub>2</sub>-CH<sub>2</sub>-CH<sub>3</sub>), 28.75 (CH<sub>2</sub>-CH<sub>2</sub>-CH<sub>2</sub>-CH<sub>2</sub>-CH<sub>2</sub>-CH<sub>3</sub>), 28.36 (CH<sub>2</sub>-CH<sub>2</sub>-CH<sub>2</sub>-CH<sub>2</sub>-CH<sub>2</sub>-CH<sub>3</sub>), 25.93 (CH<sub>2</sub>-CH<sub>2</sub>-CH<sub>2</sub>-CH<sub>2</sub>-CH<sub>3</sub>), 22.27 (CH<sub>2</sub>-CH<sub>2</sub>-CH<sub>2</sub>-CH<sub>2</sub>-CH<sub>2</sub>-CH<sub>3</sub>), 21.91 (CH<sub>2</sub>-CH<sub>2</sub>-CH<sub>2</sub>-CH<sub>2</sub>-CH<sub>3</sub>), 13.77 (CH<sub>2</sub>-CH<sub>2</sub>-CH<sub>2</sub>-CH<sub>2</sub>-CH<sub>2</sub>-CH<sub>3</sub>).

**1-butyl-3-pentyl-1,2,3-benzotriazolium bromide(1but3pentBTBr)**

<sup>1</sup>H-NMR (CDCl<sub>3</sub>, 400 MHz): 8.62 (m, 2H,Ar), 7.96 (m, 2H, Ar), 5.23 (m, 4H, CH<sub>2</sub>-CH<sub>2</sub>-CH<sub>2</sub>-CH<sub>2</sub>-CH<sub>3</sub>, CH<sub>2</sub>-CH<sub>2</sub>-CH<sub>2</sub>-CH<sub>2</sub>-CH<sub>3</sub>), 2.15 (m, 4H, CH<sub>2</sub>-CH<sub>2</sub>-CH<sub>2</sub>-CH<sub>3</sub>), 1.44 (m, 6H, CH<sub>2</sub>-CH<sub>2</sub>-CH<sub>2</sub>-CH<sub>2</sub>-CH<sub>3</sub>), 0.97 (t, 3H,CH<sub>2</sub>-CH<sub>2</sub>-CH<sub>2</sub>-CH<sub>3</sub>), 0.88 (t, 3H,CH<sub>2</sub>-CH<sub>2</sub>-CH<sub>2</sub>-CH<sub>2</sub>-CH<sub>3</sub>). <sup>13</sup>C NMR (CDCl<sub>3</sub>, 100 MHz): 134.57 (C-8, C-9), 131.61 (C-4, C-7), 114.29 (C-5, C-6), 52.66 (CH<sub>2</sub>-CH<sub>2</sub>-CH<sub>2</sub>-CH<sub>3</sub>), 52.43 (CH<sub>2</sub>-CH<sub>2</sub>-CH<sub>2</sub>-CH<sub>2</sub>-CH<sub>3</sub>), 30.89 (CH<sub>2</sub>-CH<sub>2</sub>-CH<sub>2</sub>-CH<sub>3</sub>), 28.64 (CH<sub>2</sub>-CH<sub>2</sub>-CH<sub>2</sub>-CH<sub>2</sub>-CH<sub>3</sub>), 28.09 (CH<sub>2</sub>-CH<sub>2</sub>-CH<sub>2</sub>-CH<sub>2</sub>-CH<sub>3</sub>), 21.71 (CH<sub>2</sub>-CH<sub>2</sub>-CH<sub>2</sub>-CH<sub>3</sub>), 19.38 (CH<sub>2</sub>-CH<sub>2</sub>-CH<sub>2</sub>-CH<sub>2</sub>-CH<sub>3</sub>), 13.53 (CH<sub>2</sub>-CH<sub>2</sub>-CH<sub>2</sub>-CH<sub>2</sub>-CH<sub>3</sub>), 13.20 (CH<sub>2</sub>-CH<sub>2</sub>-CH<sub>2</sub>-CH<sub>2</sub>-CH<sub>3</sub>).

**1-butyl-3-pentyl-1,2,3-benzotriazolium tetrafluoroborate(1but3pentBTBF<sub>4</sub>)**

<sup>1</sup>H-NMR (CDCl<sub>3</sub>, 400 MHz): 8.41 (m, 2H,Ar), 7.93 (m, 2H, Ar), 5.10 (m, 4H, CH<sub>2</sub>-CH<sub>2</sub>-CH<sub>2</sub>-CH<sub>2</sub>-CH<sub>3</sub>, CH<sub>2</sub>-CH<sub>2</sub>-CH<sub>2</sub>-CH<sub>3</sub>), 2.14 (m, 4H, CH<sub>2</sub>-CH<sub>2</sub>-CH<sub>2</sub>-CH<sub>3</sub>), 1.42 (m, 6H, CH<sub>2</sub>-CH<sub>2</sub>-CH<sub>2</sub>-CH<sub>2</sub>-CH<sub>3</sub>), 0.98 (t, 3H,CH<sub>2</sub>-CH<sub>2</sub>-CH<sub>2</sub>-CH<sub>3</sub>), 0.89 (t, 3H,CH<sub>2</sub>-CH<sub>2</sub>-CH<sub>2</sub>-CH<sub>2</sub>-CH<sub>3</sub>). <sup>13</sup>C NMR (CDCl<sub>3</sub>, 100 MHz): 132.87 (C-8, C-9), 129.86 (C-4, C-7), 112.16 (C-5, C-6), 50.57 (CH<sub>2</sub>-CH<sub>2</sub>-CH<sub>2</sub>-CH<sub>3</sub>), 50.34 (CH<sub>2</sub>-CH<sub>2</sub>-CH<sub>2</sub>-CH<sub>2</sub>-CH<sub>3</sub>), 29.05 (CH<sub>2</sub>-CH<sub>2</sub>-CH<sub>2</sub>-CH<sub>3</sub>), 26.82 (CH<sub>2</sub>-CH<sub>2</sub>-CH<sub>2</sub>-CH<sub>2</sub>-CH<sub>3</sub>), 26.39 (CH<sub>2</sub>-CH<sub>2</sub>-CH<sub>2</sub>-CH<sub>2</sub>-CH<sub>3</sub>), 20.01 (CH<sub>2</sub>-CH<sub>2</sub>-CH<sub>2</sub>-CH<sub>3</sub>), 17.67 (CH<sub>2</sub>-CH<sub>2</sub>-CH<sub>2</sub>-CH<sub>2</sub>-CH<sub>3</sub>), 11.81 (CH<sub>2</sub>-CH<sub>2</sub>-CH<sub>2</sub>-CH<sub>2</sub>-CH<sub>3</sub>), 11.44 (CH<sub>2</sub>-CH<sub>2</sub>-CH<sub>2</sub>-CH<sub>2</sub>-CH<sub>3</sub>).

**1-butyl-3-pentyl-1,2,3-benzotriazolium hexafluorophosphate(1but3pentBTPF<sub>6</sub>)**

<sup>1</sup>H-NMR (CDCl<sub>3</sub>, 400 MHz): 8.11 (m, 2H,Ar), 7.87 (m, 2H, Ar), 4.92 (m, 4H, CH<sub>2</sub>-CH<sub>2</sub>-CH<sub>2</sub>-CH<sub>2</sub>-CH<sub>3</sub>, CH<sub>2</sub>-CH<sub>2</sub>-CH<sub>2</sub>-CH<sub>3</sub>), 2.10 (m, 4H, CH<sub>2</sub>-CH<sub>2</sub>-CH<sub>2</sub>-CH<sub>3</sub>), 1.40 (m, 6H, CH<sub>2</sub>-CH<sub>2</sub>-CH<sub>2</sub>-CH<sub>2</sub>-CH<sub>3</sub>), 0.97 (t, 3H, CH<sub>2</sub>-CH<sub>2</sub>-CH<sub>2</sub>-CH<sub>3</sub>), 0.89 (t, 3H, CH<sub>2</sub>-CH<sub>2</sub>-CH<sub>2</sub>-CH<sub>2</sub>-CH<sub>3</sub>). <sup>13</sup>C NMR (CDCl<sub>3</sub>, 100 MHz): 134.74 (C-8, C-9), 131.69 (C-4, C-7), 113.50 (C-5, C-6), 52.07 (CH<sub>2</sub>-CH<sub>2</sub>-CH<sub>2</sub>-CH<sub>3</sub>), 51.83 (CH<sub>2</sub>-CH<sub>2</sub>-CH<sub>2</sub>-CH<sub>2</sub>-CH<sub>3</sub>), 30.76 (CH<sub>2</sub>-CH<sub>2</sub>-CH<sub>2</sub>-CH<sub>3</sub>), 28.54 (CH<sub>2</sub>-CH<sub>2</sub>-CH<sub>2</sub>-CH<sub>2</sub>-CH<sub>3</sub>), 28.31 (CH<sub>2</sub>-CH<sub>2</sub>-CH<sub>2</sub>-CH<sub>2</sub>-CH<sub>3</sub>), 21.91 (CH<sub>2</sub>-CH<sub>2</sub>-CH<sub>2</sub>-CH<sub>3</sub>), 19.58 (CH<sub>2</sub>-CH<sub>2</sub>-CH<sub>2</sub>-CH<sub>2</sub>-CH<sub>3</sub>), 13.69 (CH<sub>2</sub>-CH<sub>2</sub>-CH<sub>2</sub>-CH<sub>2</sub>-CH<sub>3</sub>), 10.28 (CH<sub>2</sub>-CH<sub>2</sub>-CH<sub>2</sub>-CH<sub>2</sub>-CH<sub>3</sub>).

**1-pentyl-3-propyl-1,2,3-benzotriazolium bromide(1pent3propBTBr)**

<sup>1</sup>H-NMR (CDCl<sub>3</sub>, 400 MHz): 8.62(m, 2H, Ar), 7.97 (m, 2H, Ar), 5.22 (t, 4H, CH<sub>2</sub>-CH<sub>2</sub>-CH<sub>2</sub>-CH<sub>2</sub>-CH<sub>3</sub>, CH<sub>2</sub>-CH<sub>2</sub>-CH<sub>3</sub>), 2.22 (m, 4H, CH<sub>2</sub>-CH<sub>2</sub>-CH<sub>2</sub>-CH<sub>2</sub>-CH<sub>3</sub>), 1.40 (CH<sub>2</sub>-CH<sub>2</sub>-CH<sub>3</sub>, CH<sub>2</sub>-CH<sub>2</sub>-CH<sub>2</sub>-CH<sub>2</sub>-CH<sub>3</sub>), 1.06 (t, 3H, CH<sub>2</sub>-CH<sub>2</sub>-CH<sub>3</sub>), 0.88 (t, 3H, CH<sub>2</sub>-CH<sub>2</sub>-CH<sub>2</sub>-CH<sub>2</sub>-CH<sub>3</sub>). <sup>13</sup>C NMR (CDCl<sub>3</sub>, 100 MHz): 134.55 (C-8, C-9), 131.56 (C-4, C-7), 114.20 (C-5, C-6), 53.97 (CH<sub>2</sub>-CH<sub>2</sub>-CH<sub>3</sub>), 52.57 (CH<sub>2</sub>-CH<sub>2</sub>-CH<sub>2</sub>-CH<sub>2</sub>-CH<sub>3</sub>), 28.57 (CH<sub>2</sub>-CH<sub>2</sub>-CH<sub>2</sub>-CH<sub>2</sub>-CH<sub>3</sub>), 28.04 (CH<sub>2</sub>-CH<sub>2</sub>-CH<sub>2</sub>-CH<sub>2</sub>-CH<sub>3</sub>), 22.55 (CH<sub>2</sub>-CH<sub>2</sub>-CH<sub>2</sub>-CH<sub>2</sub>-CH<sub>3</sub>), 21.67 (CH<sub>2</sub>-CH<sub>2</sub>-CH<sub>3</sub>), 13.49 (CH<sub>2</sub>-CH<sub>2</sub>-CH<sub>3</sub>), 10.75 (CH<sub>2</sub>-CH<sub>2</sub>-CH<sub>2</sub>-CH<sub>2</sub>-CH<sub>3</sub>).

**1-pentyl-3-propyl-1,2,3-benzotriazolium tetrafluoroborate(1pent3propBTBF<sub>4</sub>)**



$^1\text{H-NMR}$  ( $\text{CDCl}_3$ , 400 MHz): 7.92 (m, 2H,Ar), 7.41 (m, 2H, Ar), 4.57 (m, 4H,  $\text{CH}_2\text{-CH}_2\text{-CH}_2\text{-CH}_2\text{-CH}_3$ ,  $\text{CH}_2\text{-CH}_2\text{-CH}_3$ ), 1.64 (m, 4H,  $\text{CH}_2\text{-CH}_2\text{-CH}_2\text{-CH}_2\text{-CH}_3$ ), 0.86 (m, 4H,  $\text{CH}_2\text{-CH}_2\text{-CH}_3$ ,  $\text{CH}_2\text{-CH}_2\text{-CH}_2\text{-CH}_2\text{-CH}_3$ ), 0.50 (t, 3H,  $\text{CH}_2\text{-CH}_2\text{-CH}_3$ ), 0.34 (t, 3H,  $\text{CH}_2\text{-CH}_2\text{-CH}_2\text{-CH}_2\text{-CH}_3$ ).  $^{13}\text{C NMR}$  ( $\text{CDCl}_3$ , 100 MHz): 134.57 (C-8, C-9), 131.53 (C-4, C-7), 113.90 (C-5, C-6), 53.65 ( $\text{CH}_2\text{-CH}_2\text{-CH}_3$ ), 52.24 ( $\text{CH}_2\text{-CH}_2\text{-CH}_2\text{-CH}_2\text{-CH}_3$ ), 28.48 ( $\text{CH}_2\text{-CH}_2\text{-CH}_2\text{-CH}_2\text{-CH}_3$ ), 28.04 ( $\text{CH}_2\text{-CH}_2\text{-CH}_2\text{-CH}_2\text{-CH}_3$ ), 22.45 ( $\text{CH}_2\text{-CH}_2\text{-CH}_2\text{-CH}_2\text{-CH}_3$ ), 21.68 ( $\text{CH}_2\text{-CH}_2\text{-CH}_3$ ), 13.51 ( $\text{CH}_2\text{-CH}_2\text{-CH}_3$ ), 10.70 ( $\text{CH}_2\text{-CH}_2\text{-CH}_2\text{-CH}_2\text{-CH}_3$ ).

**1-pentyl-3-propyl-1,2,3-benzotriazolium hexafluorophosphate(1pent3propBTPF<sub>6</sub>)**

$^1\text{H-NMR}$  ( $\text{CDCl}_3$ , 400 MHz): 8.09 (m, 2H, Ar), 7.87 (m, 2H, Ar), 4.89 (m, 4H,  $\text{CH}_2\text{-CH}_2\text{-CH}_2\text{-CH}_2\text{-CH}_3$ ,  $\text{CH}_2\text{-CH}_2\text{-CH}_3$ ), 2.14 (m, 4H,  $\text{CH}_2\text{-CH}_2\text{-CH}_2\text{-CH}_2\text{-CH}_3$ ), 1.37 (m, 4H,  $\text{CH}_2\text{-CH}_2\text{-CH}_3$ ,  $\text{CH}_2\text{-CH}_2\text{-CH}_2\text{-CH}_2\text{-CH}_3$ ), 1.02 (t, 3H,  $\text{CH}_2\text{-CH}_2\text{-CH}_3$ ), 0.88 (t, 3H,  $\text{CH}_2\text{-CH}_2\text{-CH}_2\text{-CH}_2\text{-CH}_3$ ).  $^{13}\text{C NMR}$  ( $\text{CDCl}_3$ , 100 MHz): 134.76 (C-8, C-9), 131.66 (C-4, C-7), 113.45 (C-5, C-6), 53.44 ( $\text{CH}_2\text{-CH}_2\text{-CH}_3$ ), 52.01 ( $\text{CH}_2\text{-CH}_2\text{-CH}_2\text{-CH}_2\text{-CH}_3$ ), 28.52 ( $\text{CH}_2\text{-CH}_2\text{-CH}_2\text{-CH}_2\text{-CH}_3$ ), 28.30 ( $\text{CH}_2\text{-CH}_2\text{-CH}_2\text{-CH}_2\text{-CH}_3$ ), 22.46 ( $\text{CH}_2\text{-CH}_2\text{-CH}_2\text{-CH}_2\text{-CH}_3$ ), 21.91 ( $\text{CH}_2\text{-CH}_2\text{-CH}_3$ ), 13.68 ( $\text{CH}_2\text{-CH}_2\text{-CH}_3$ ), 10.82 ( $\text{CH}_2\text{-CH}_2\text{-CH}_2\text{-CH}_2\text{-CH}_3$ ).

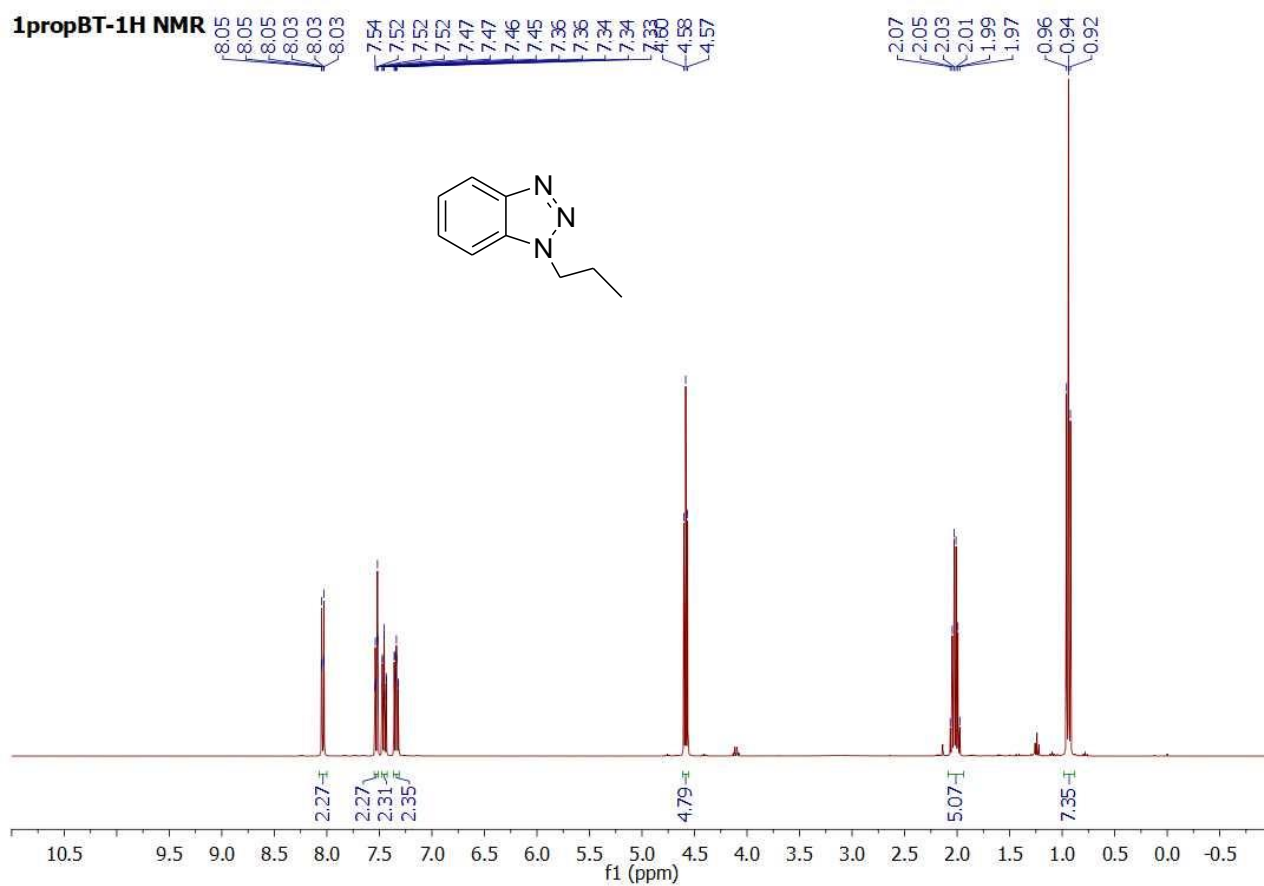

**Figure S2.** 1propBT-<sup>1</sup>H NMR

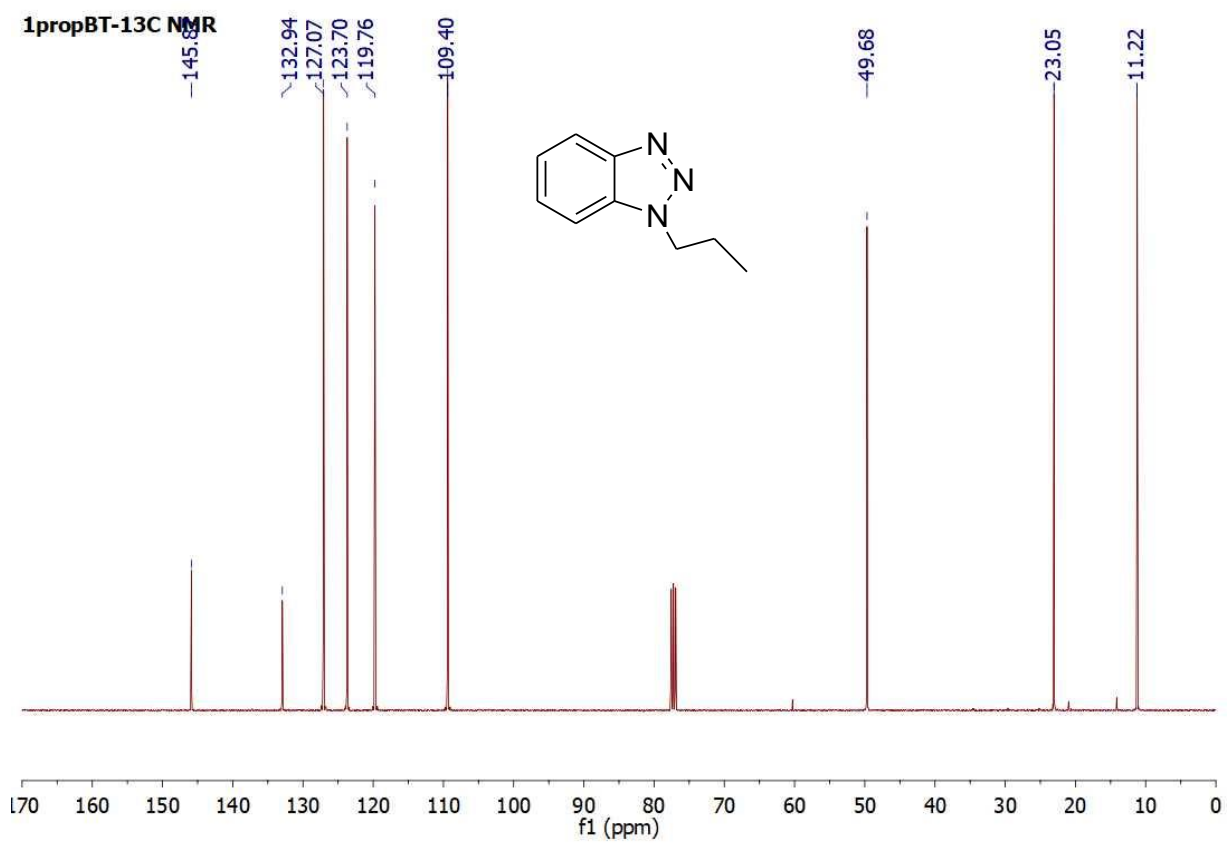

**Figure S3.** 1propBT-<sup>13</sup>C NMR

2propBT-1H NMR

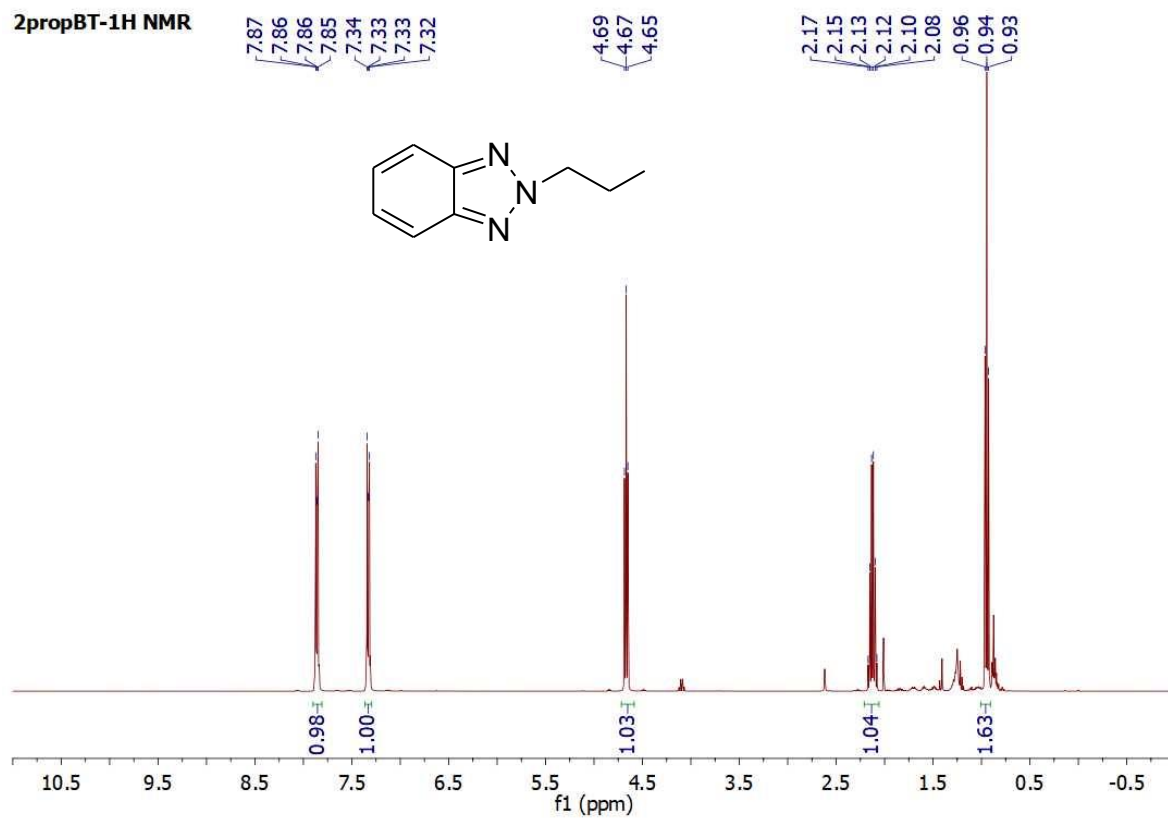

Figure S4. 2propBT-<sup>1</sup>H NMR

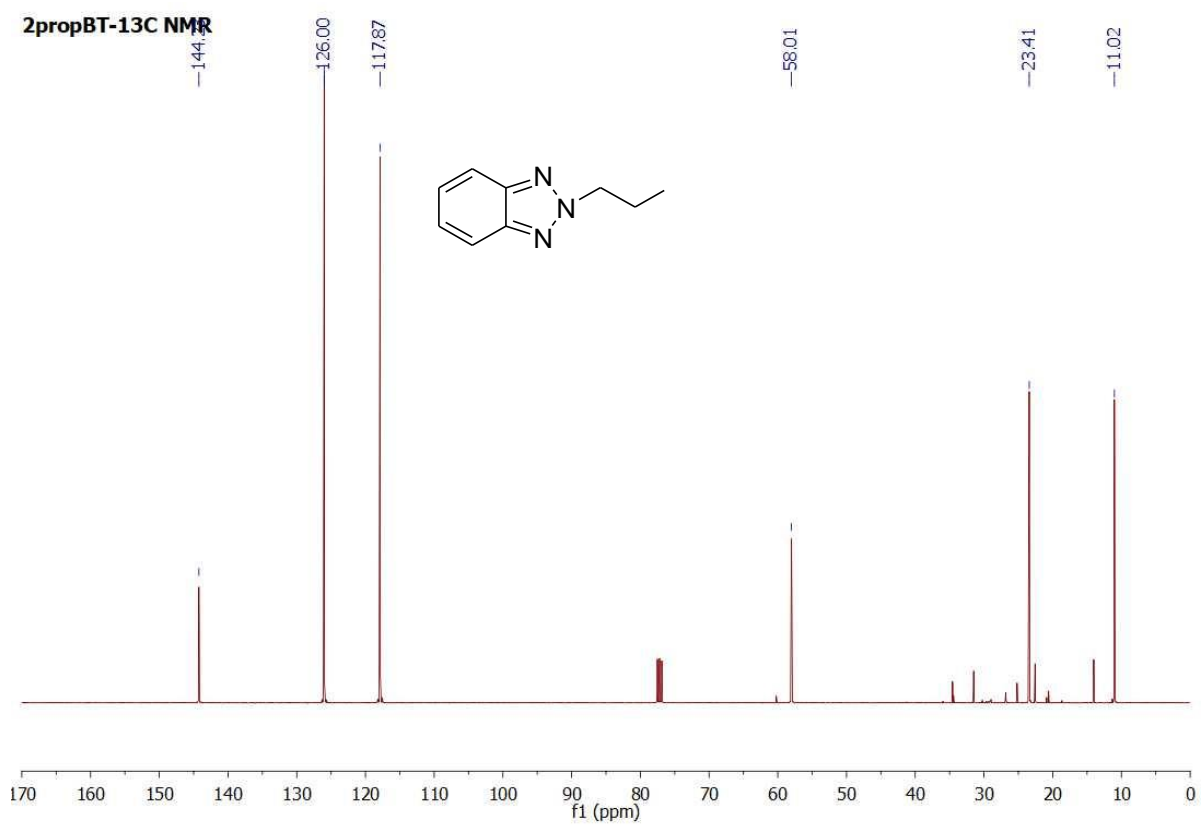

**Figure S5.** 2propBT-<sup>13</sup>C NMR

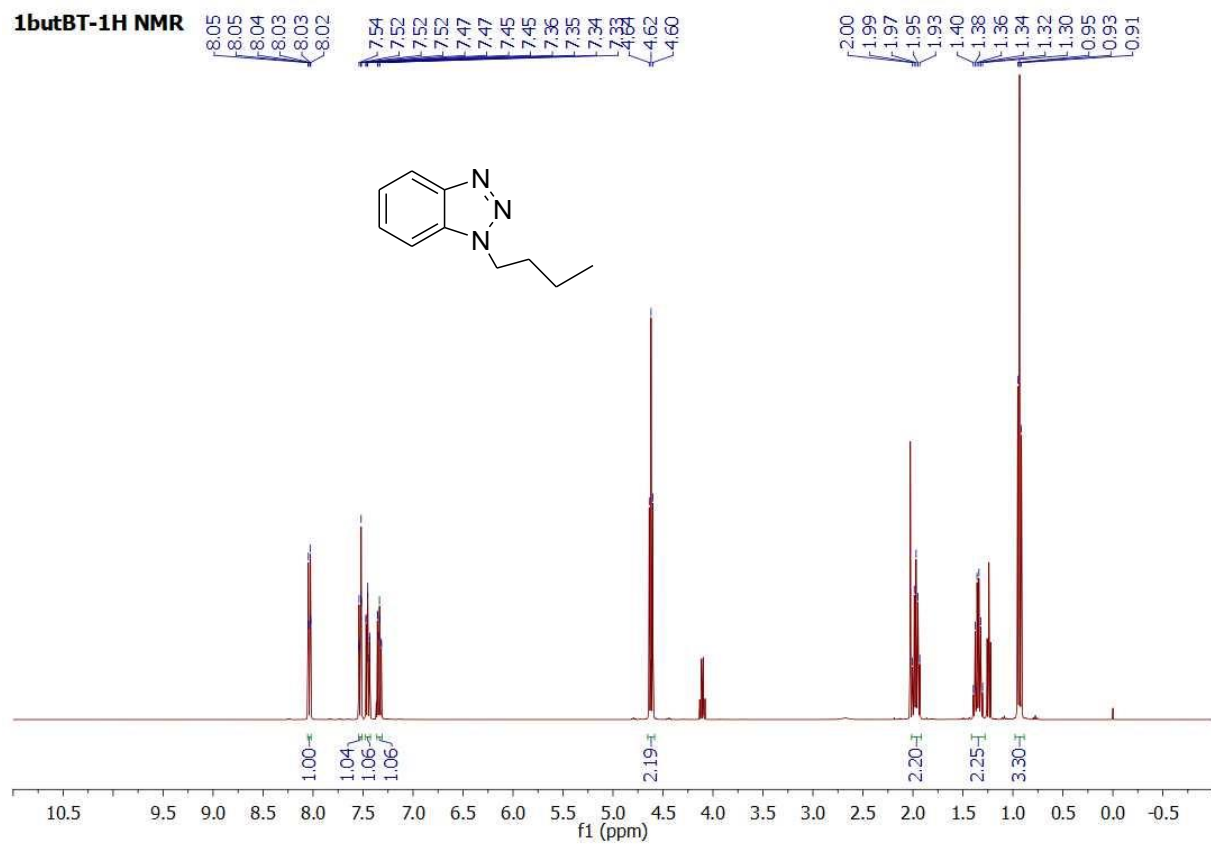

**Figure S6.** 1butBT-<sup>1</sup>H NMR

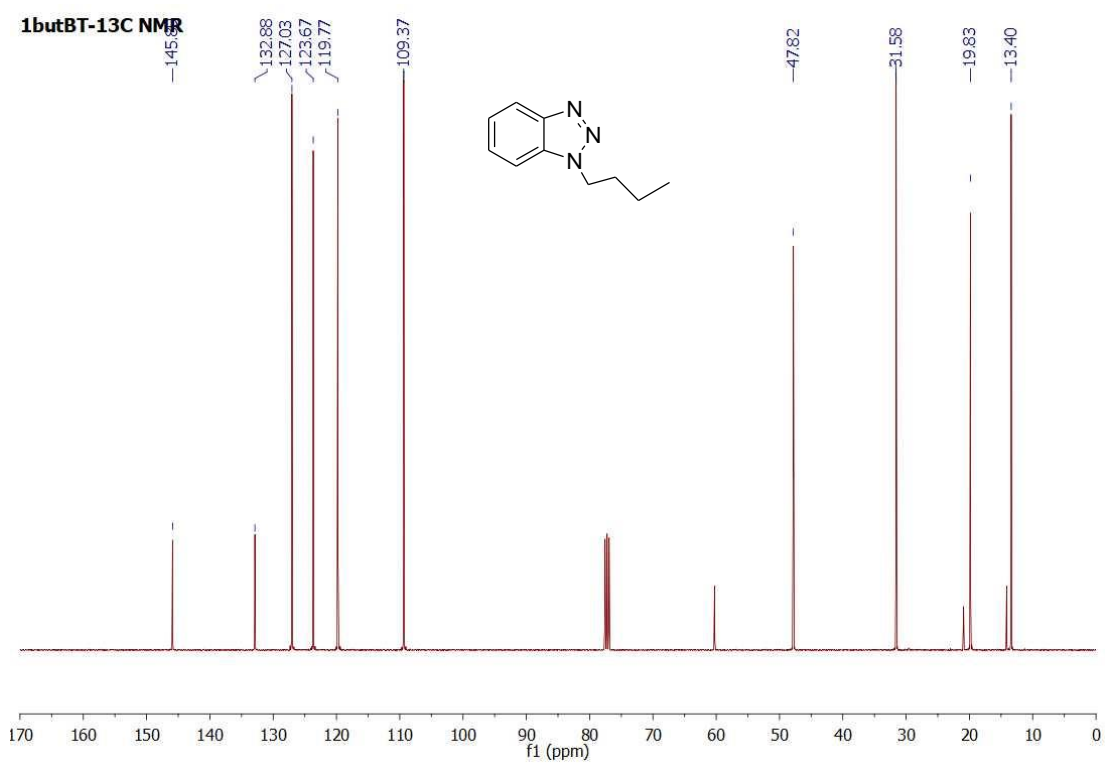

**Figure S7.** 1butBT-<sup>13</sup>C NMR

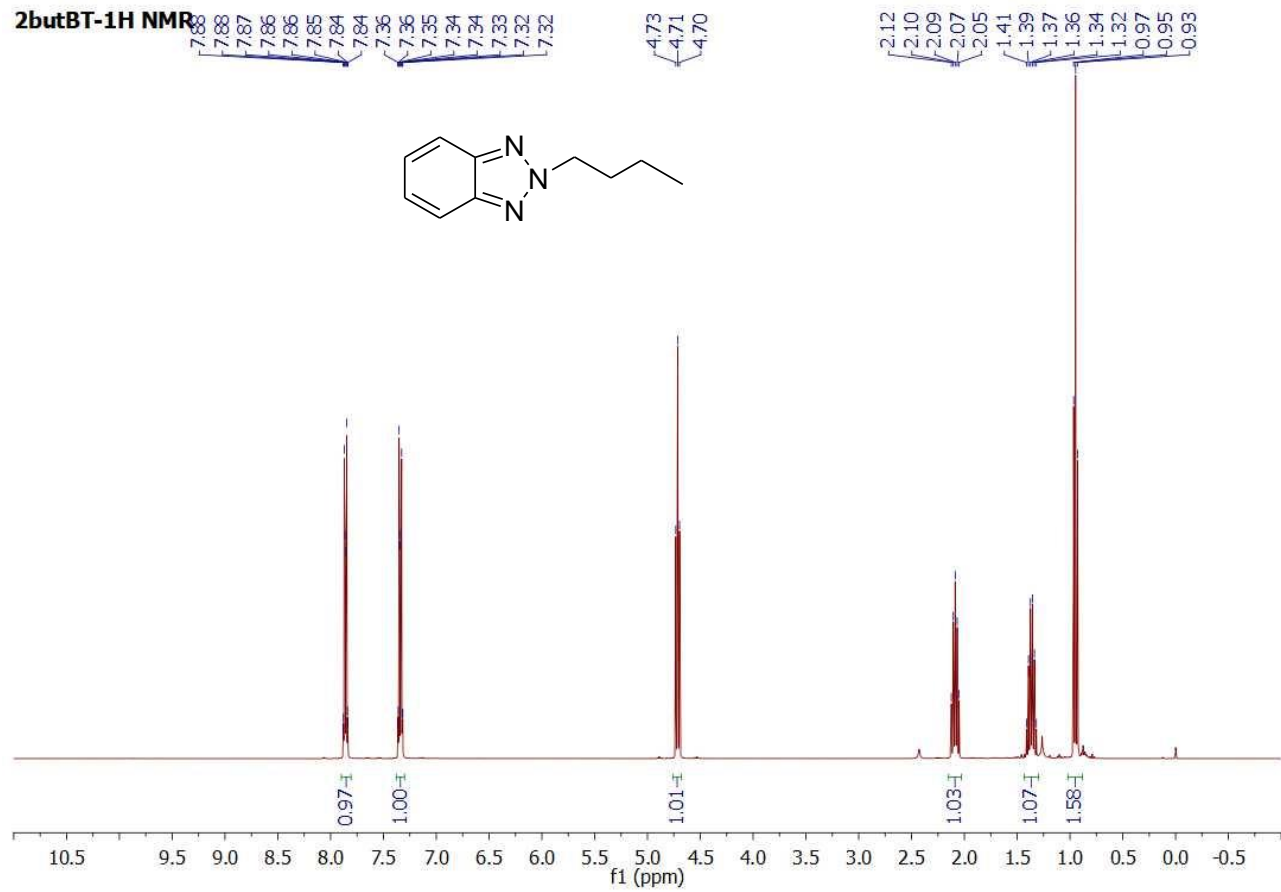

**Figure S8.2butBT-<sup>1</sup>H NMR**



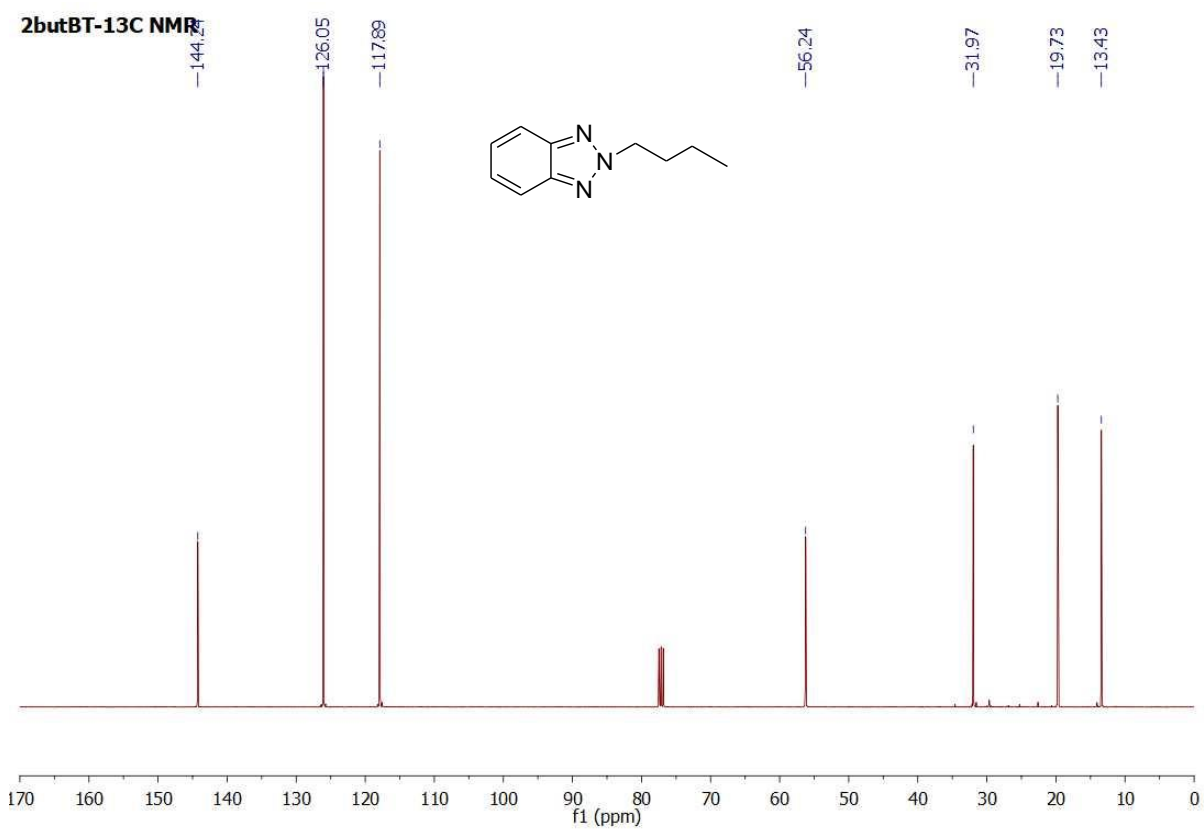

**Figure S9.2butBT-<sup>13</sup>C NMR**

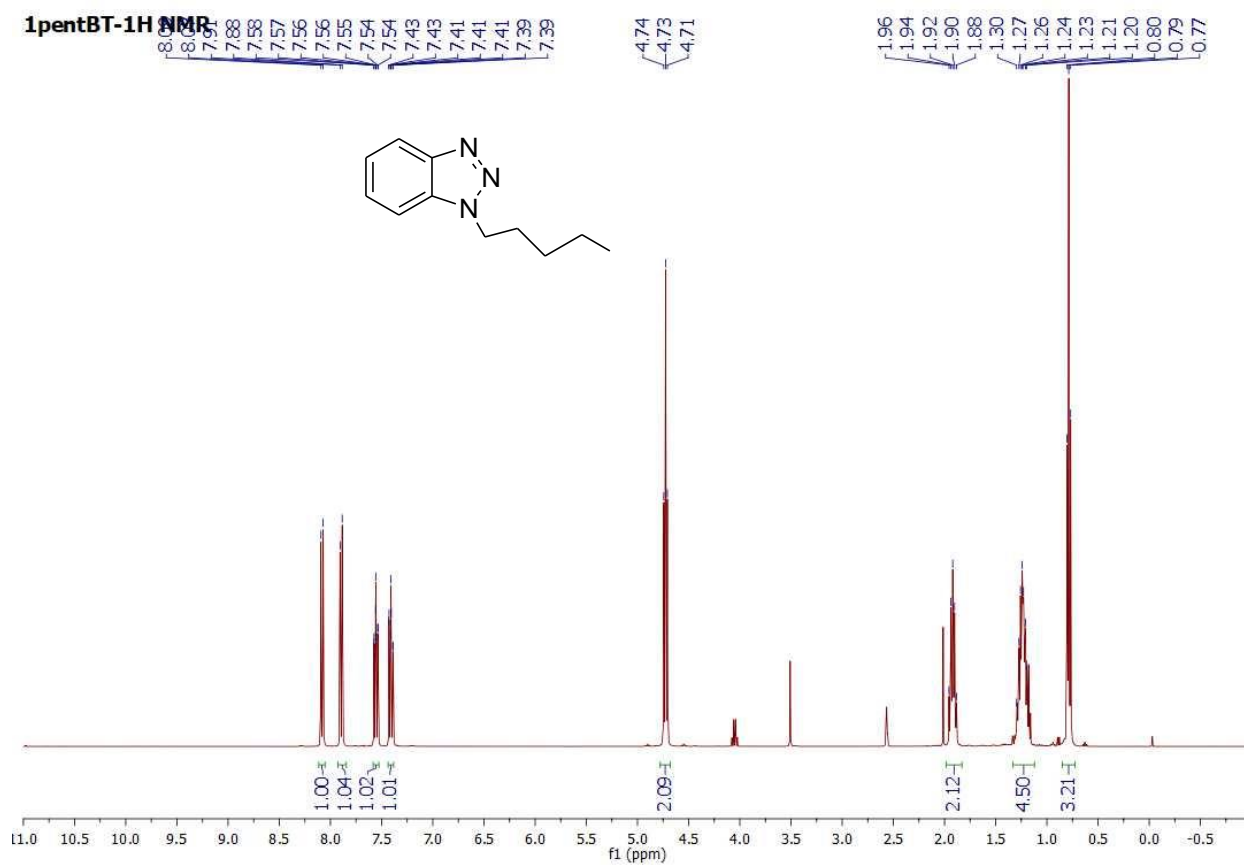

**Figure S10.1**pentBT-<sup>1</sup>H NMR

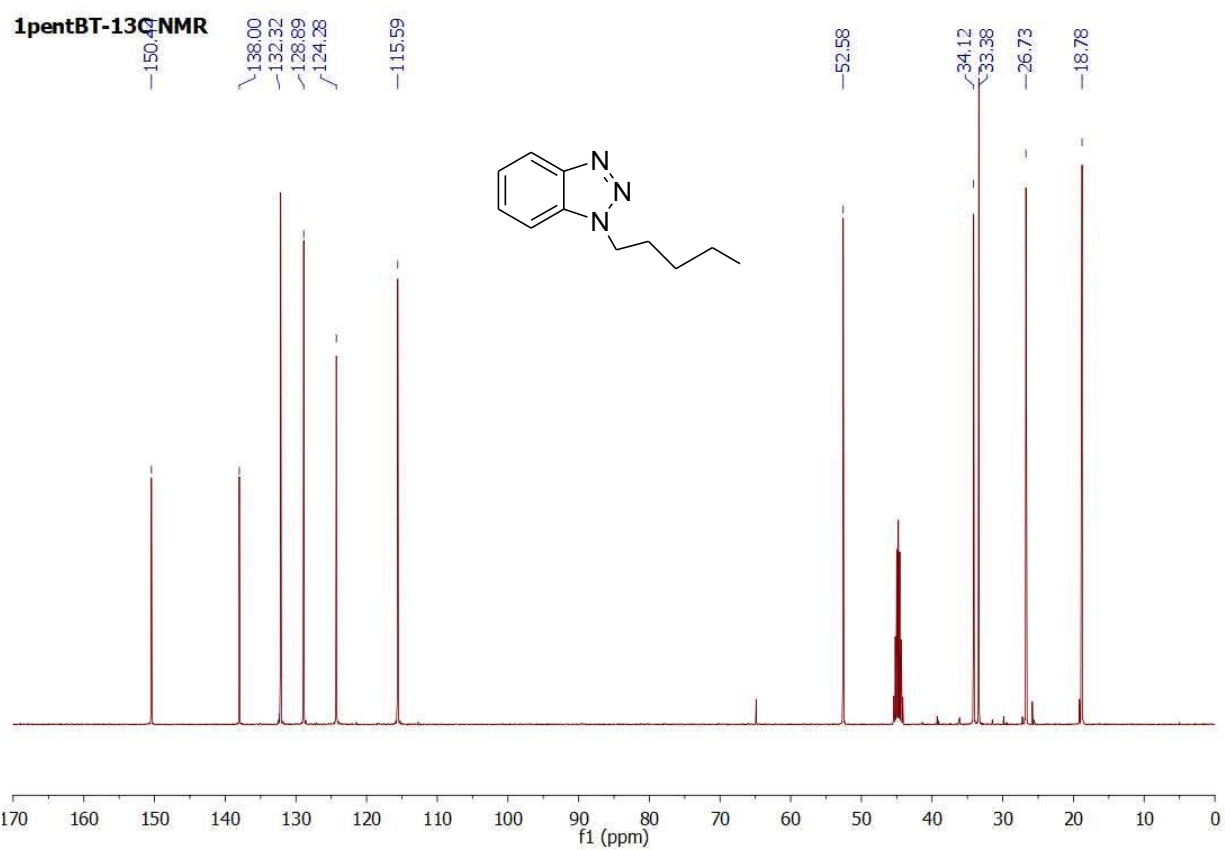

**Figure S11.1pentBT-<sup>13</sup>C NMR**

2pentBT-1H NMR

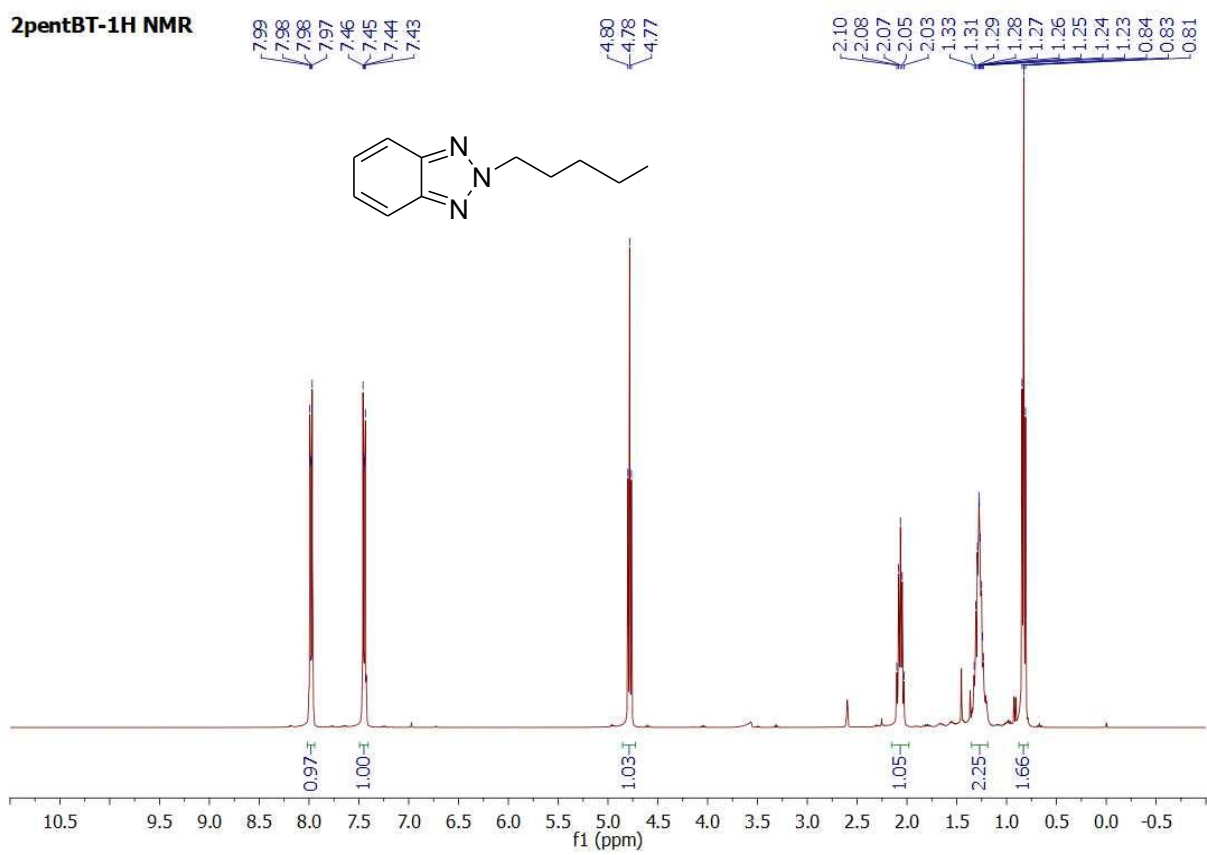

Figure S12. 2pentBT-<sup>1</sup>H NMR

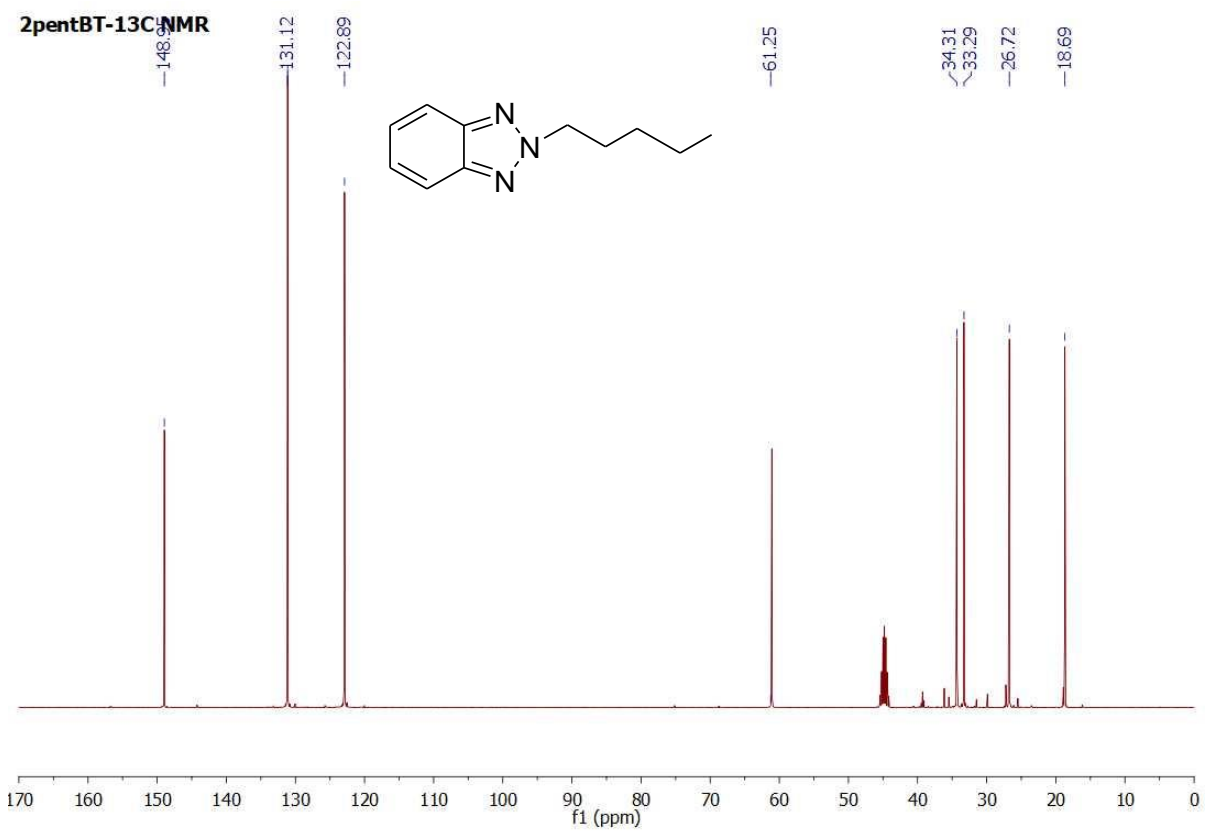

**Figure S13.** 2pentBT-<sup>13</sup>C NMR

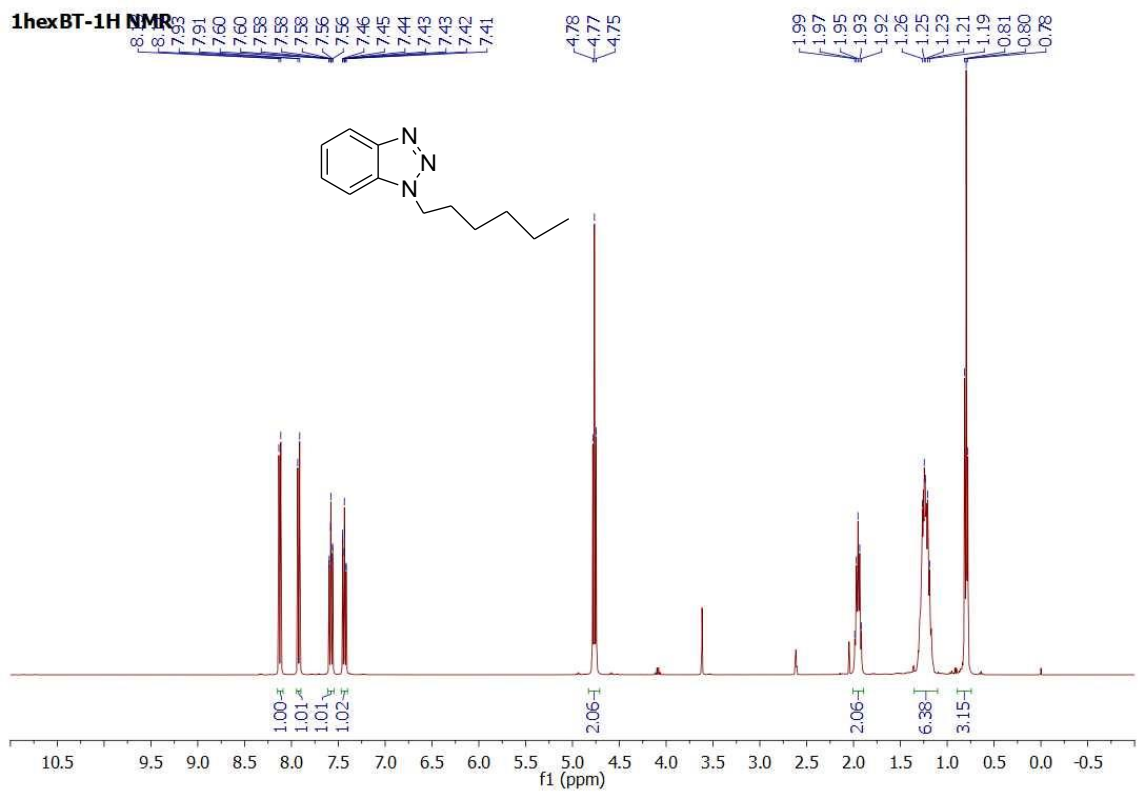

**Figure S14. 1hexBT-<sup>1</sup>H NMR**

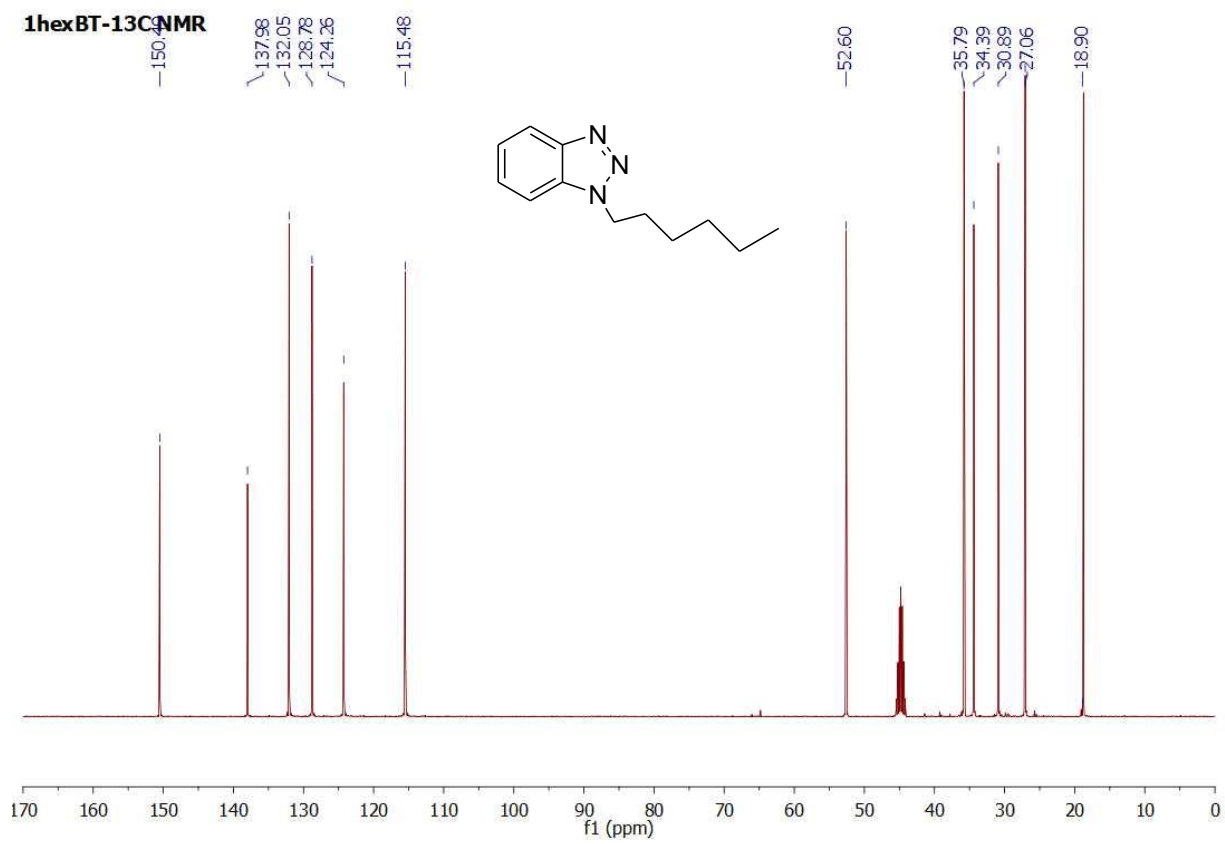

**Figure S15.1hexBT-<sup>13</sup>C NMR**

2hexBT-1H NMR

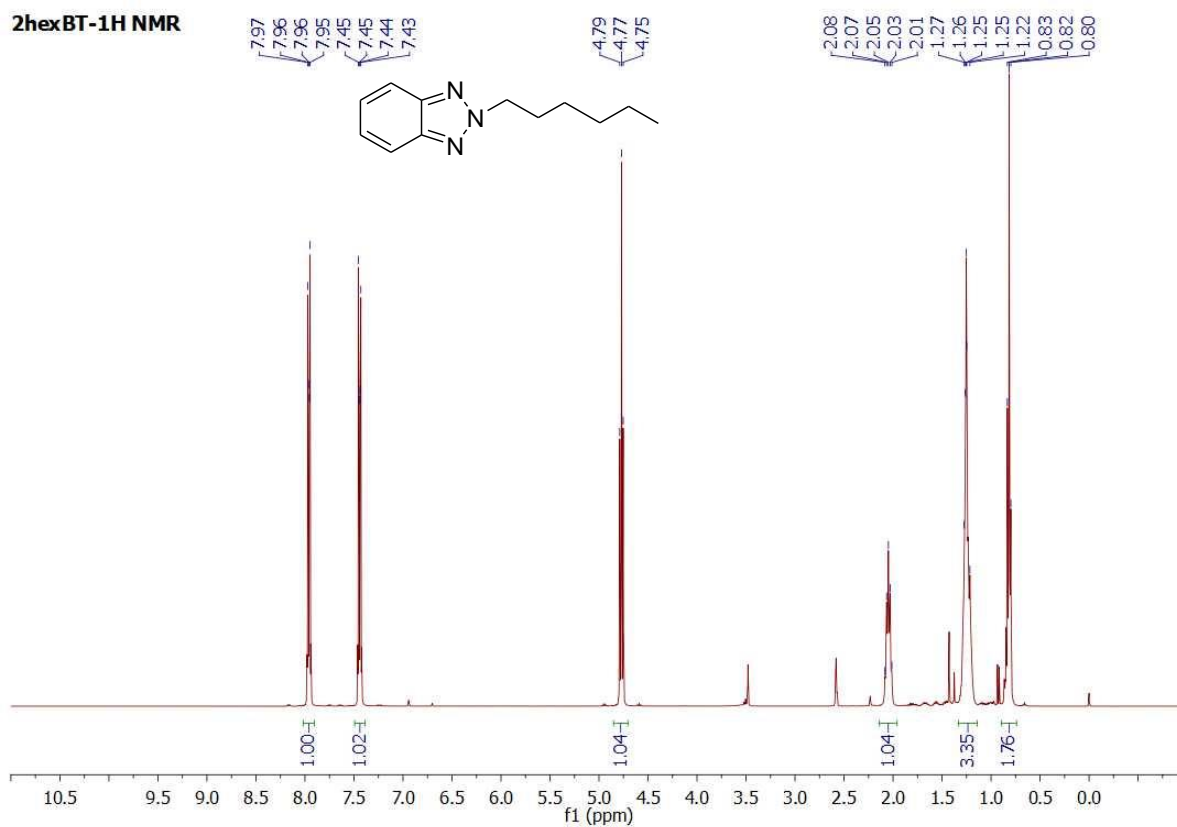

Figure S16. 2hexBT-<sup>1</sup>H NMR



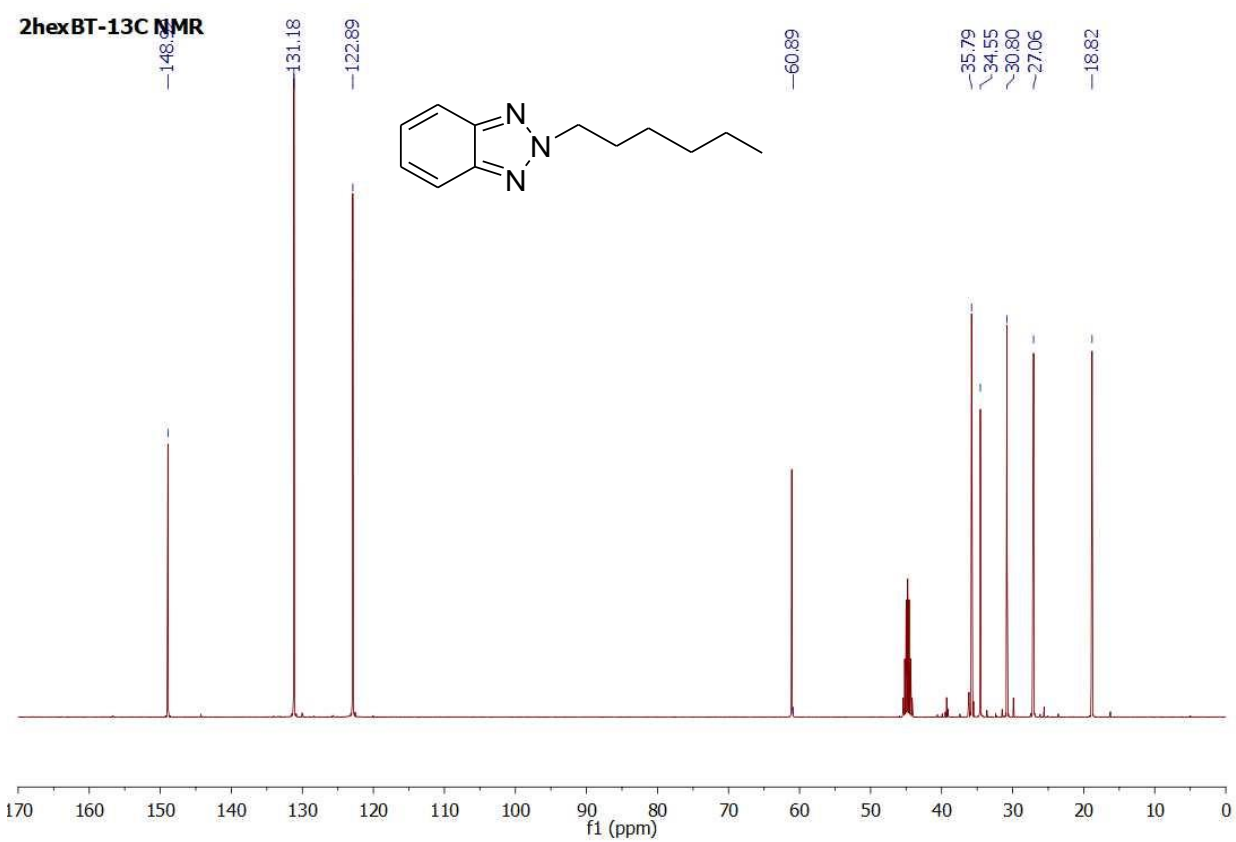

**Figure S17.** 2hexBT-<sup>13</sup>C NMR

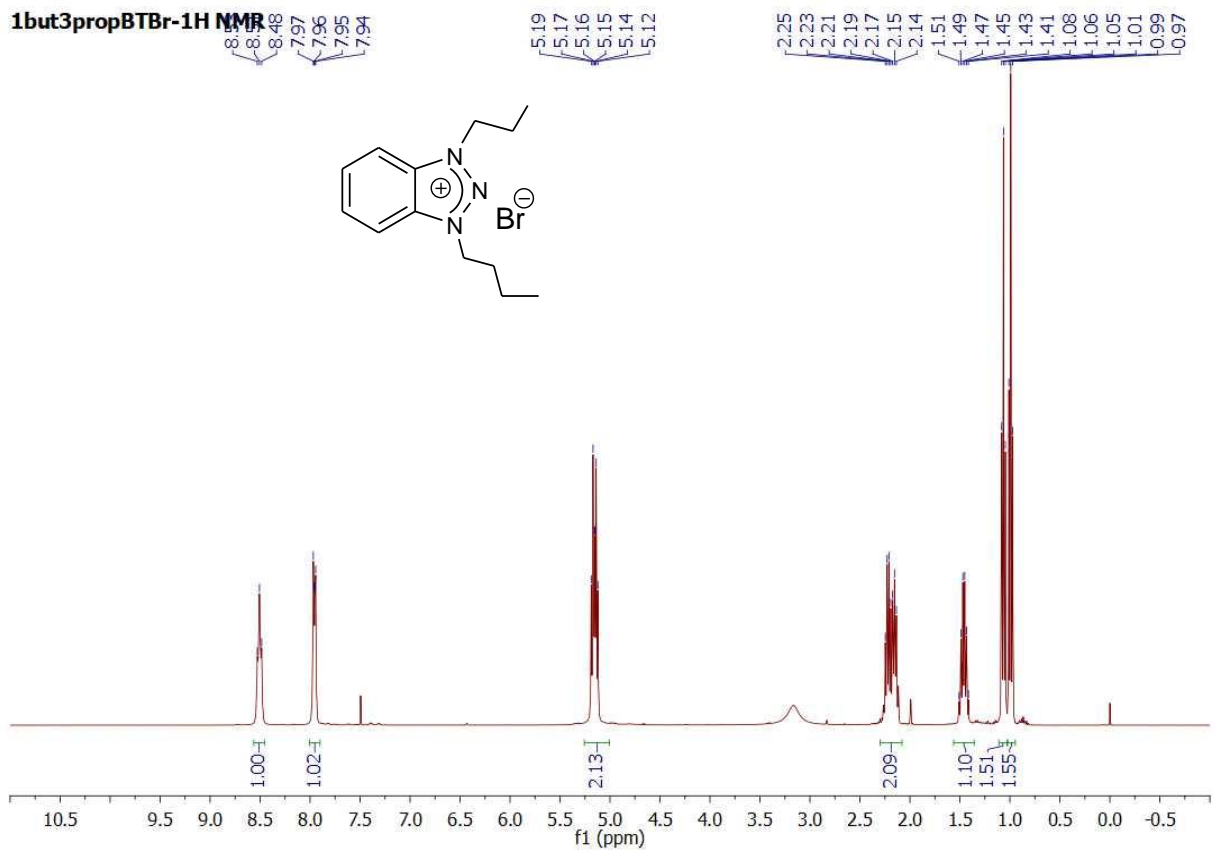

**Figure S18.** 1but3propBTBr-<sup>1</sup>H NMR

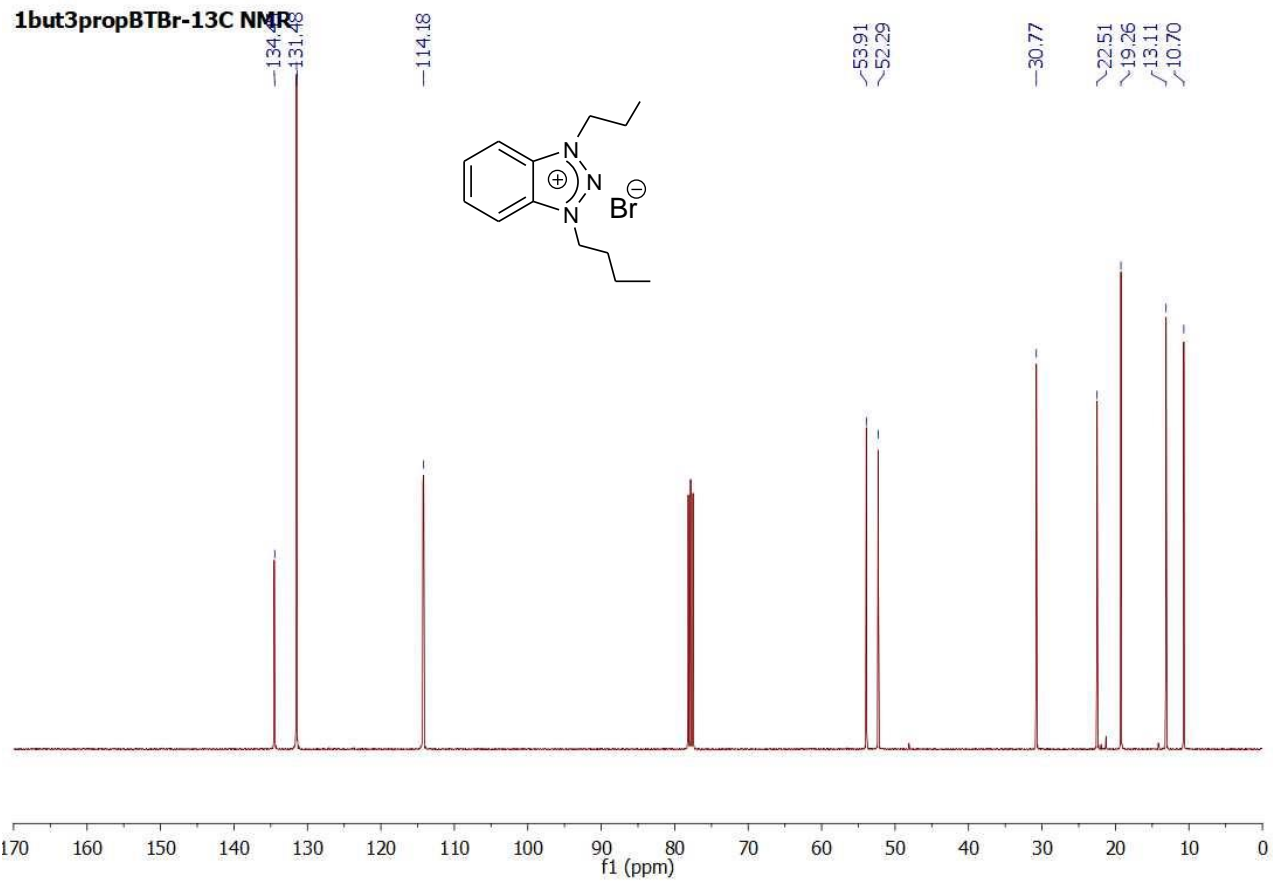

**Figure S19.** 1but3propBTBr-<sup>13</sup>C NMR

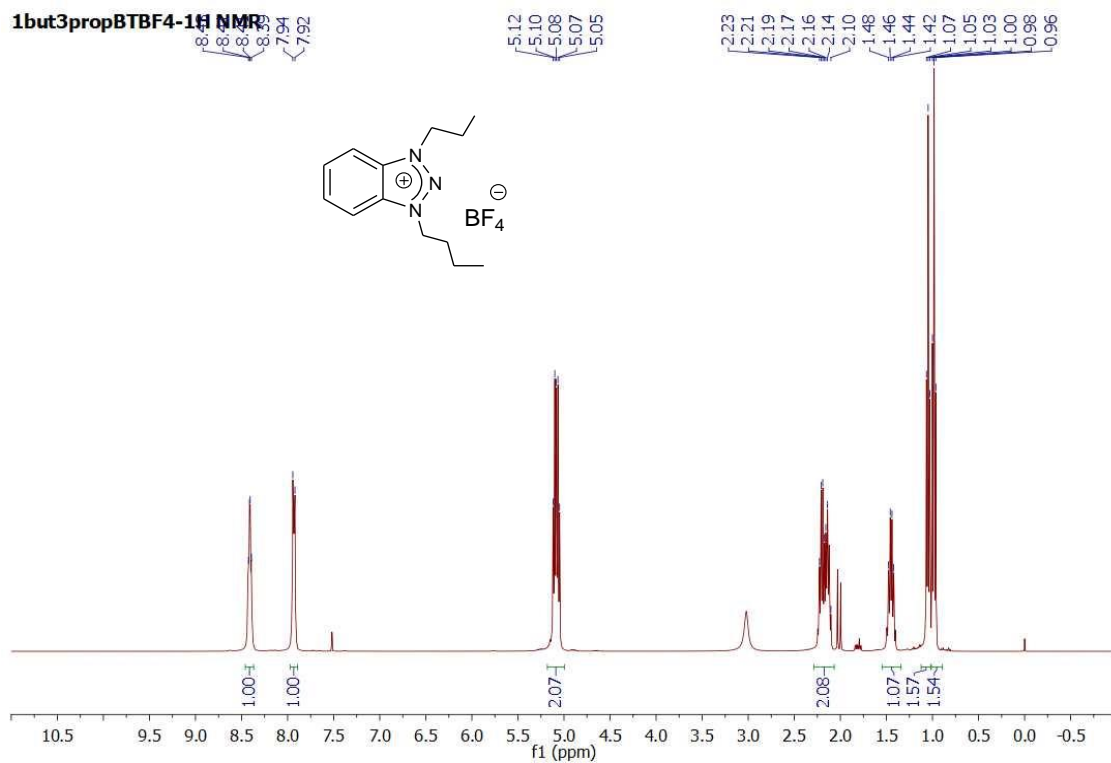

**Figure S20.1but3propBTBF<sub>4</sub>-<sup>1</sup>H NMR**

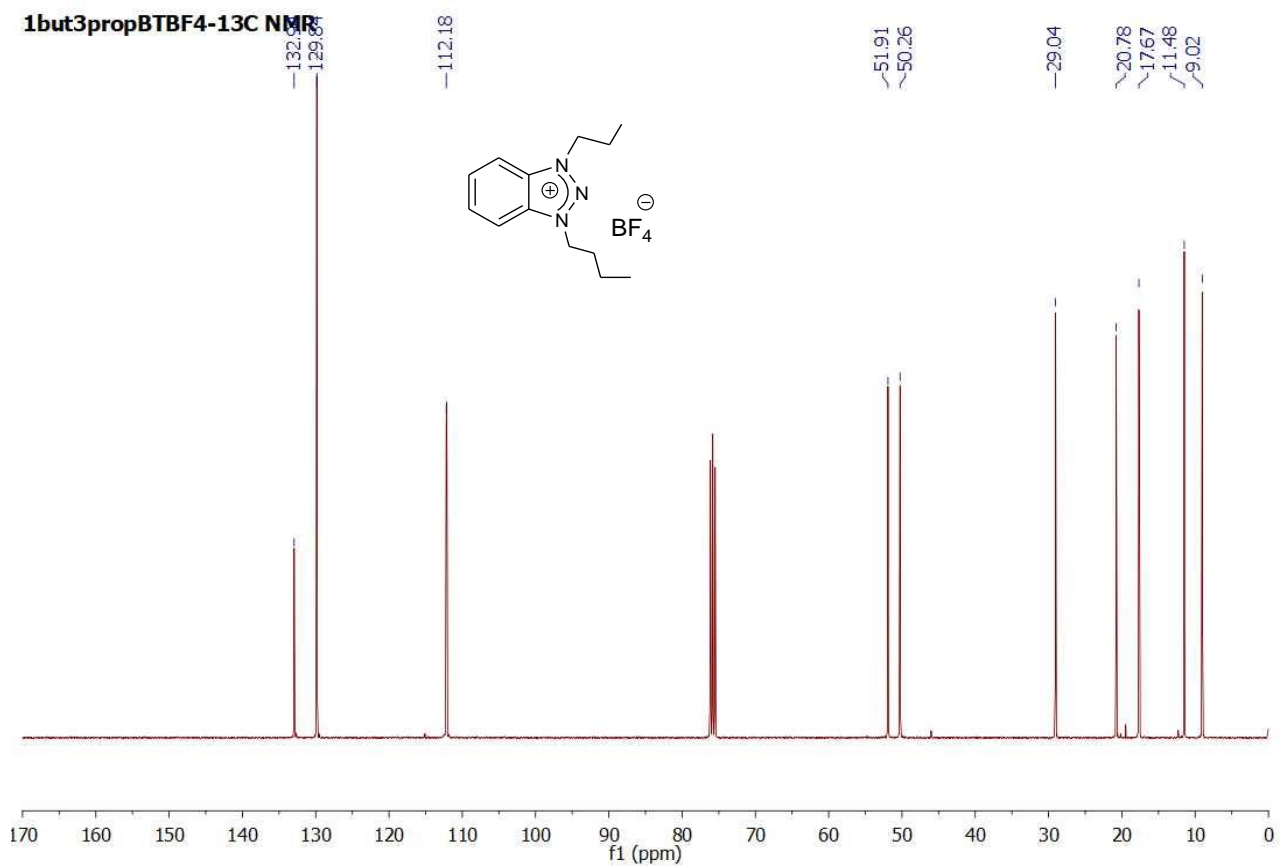

**Figure S21.** 1but3propBTBF<sub>4</sub>-<sup>13</sup>C NMR

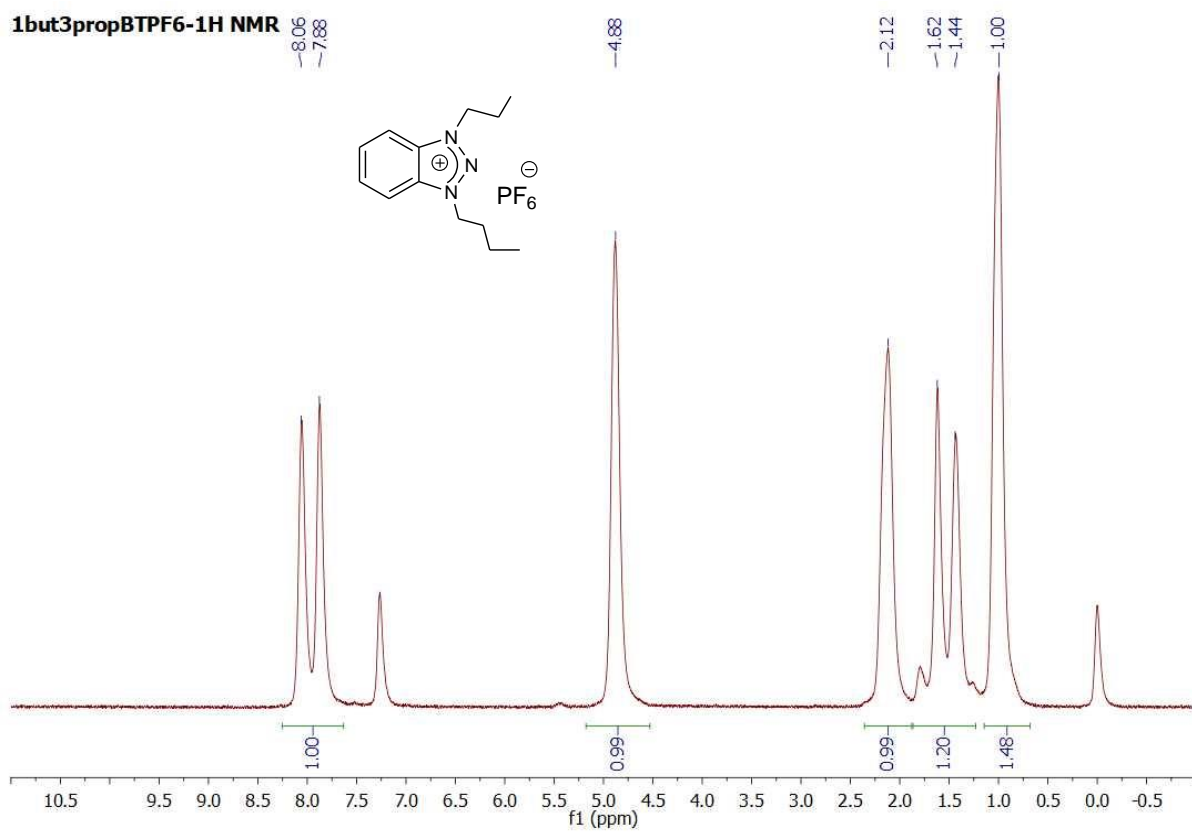

**Figure S22.** 1but3propBTPF<sub>6</sub>-<sup>1</sup>H NMR

**1but3propBTPF6-13C NMR**

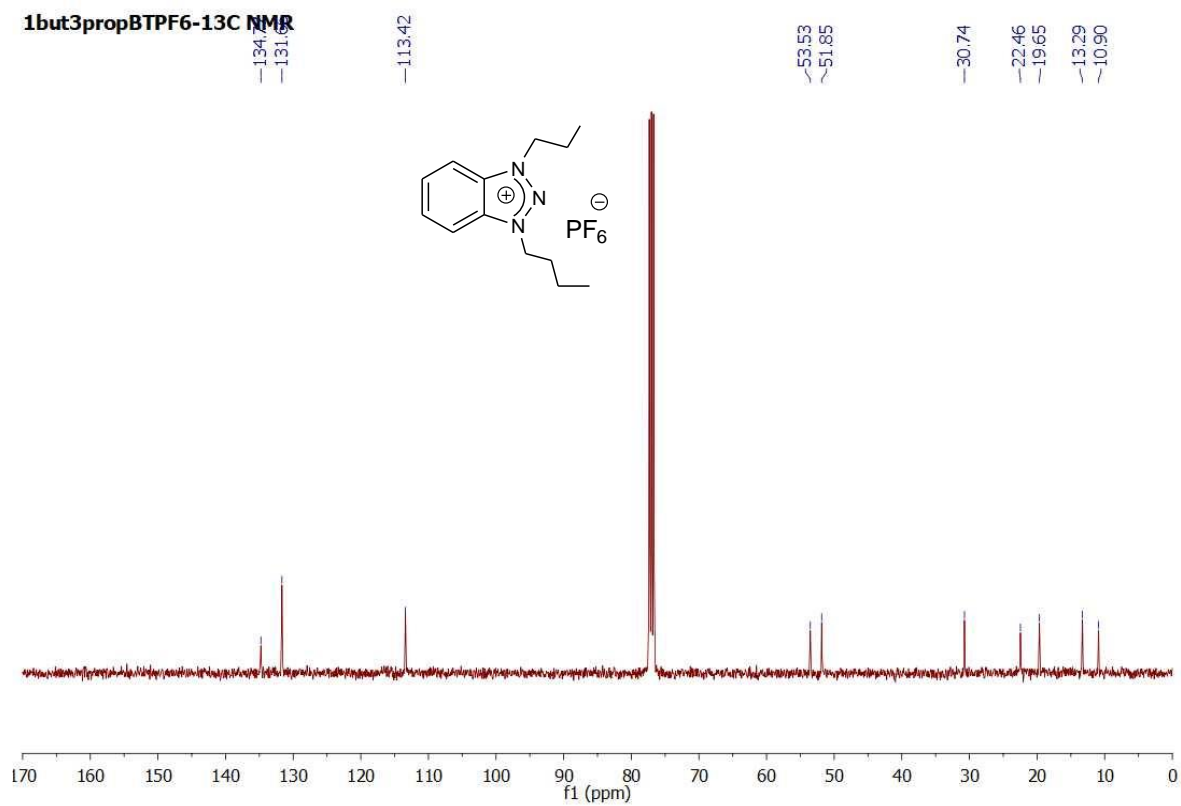

**Figure S23.** 1but3propBTPF<sub>6</sub>-<sup>13</sup>C NMR

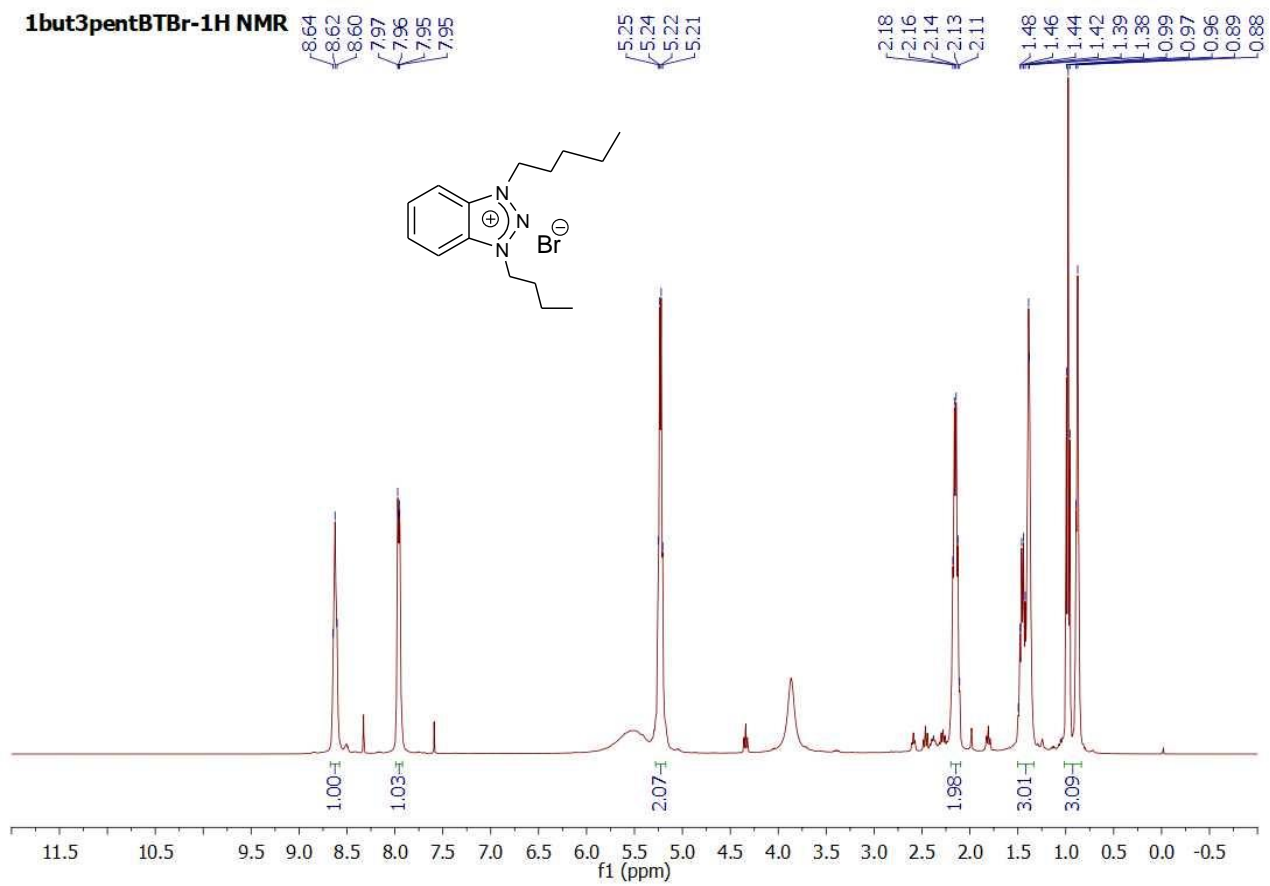

**Figure S24.1but3pentBTBr-<sup>1</sup>H NMR**



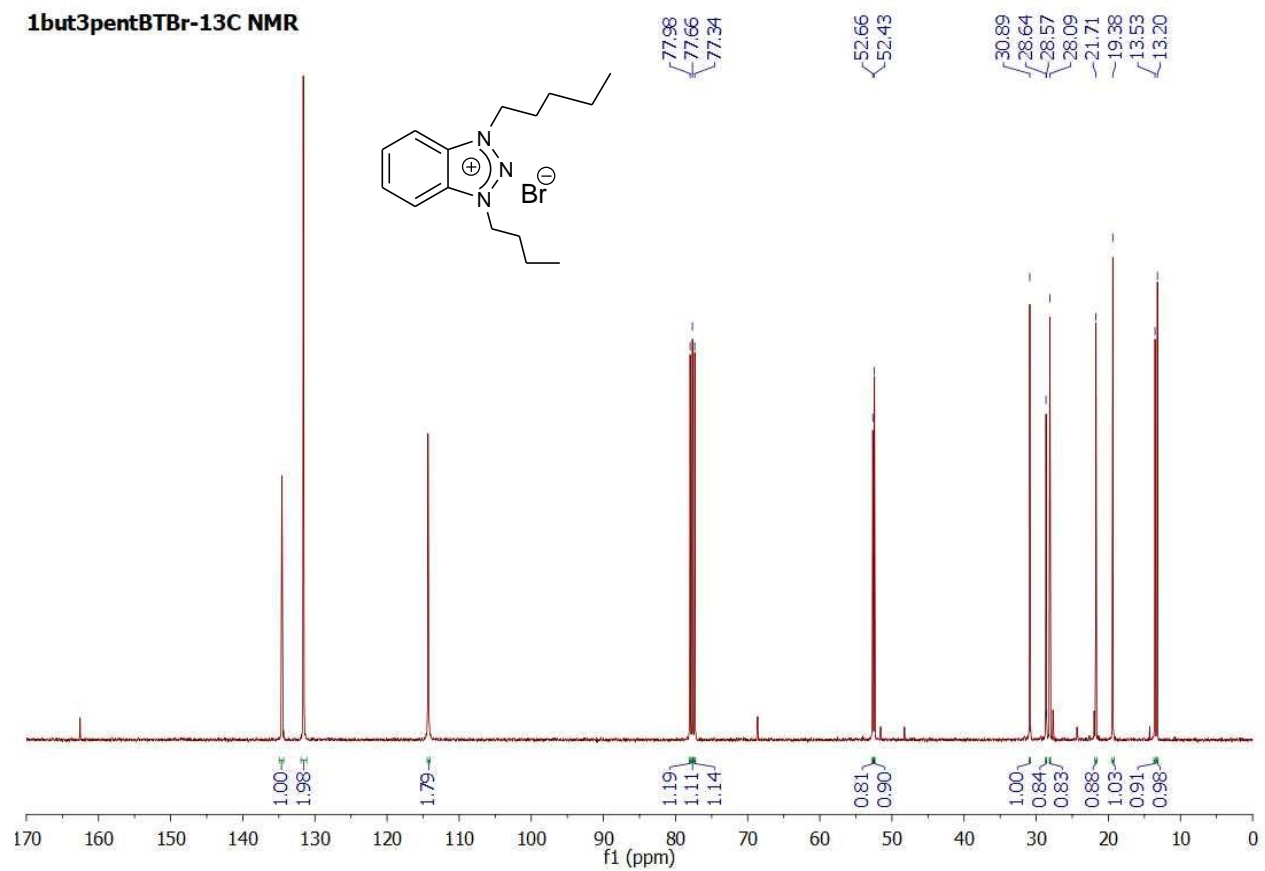

**Figure S25.** 1but3pentBTBr-<sup>13</sup>C NMR

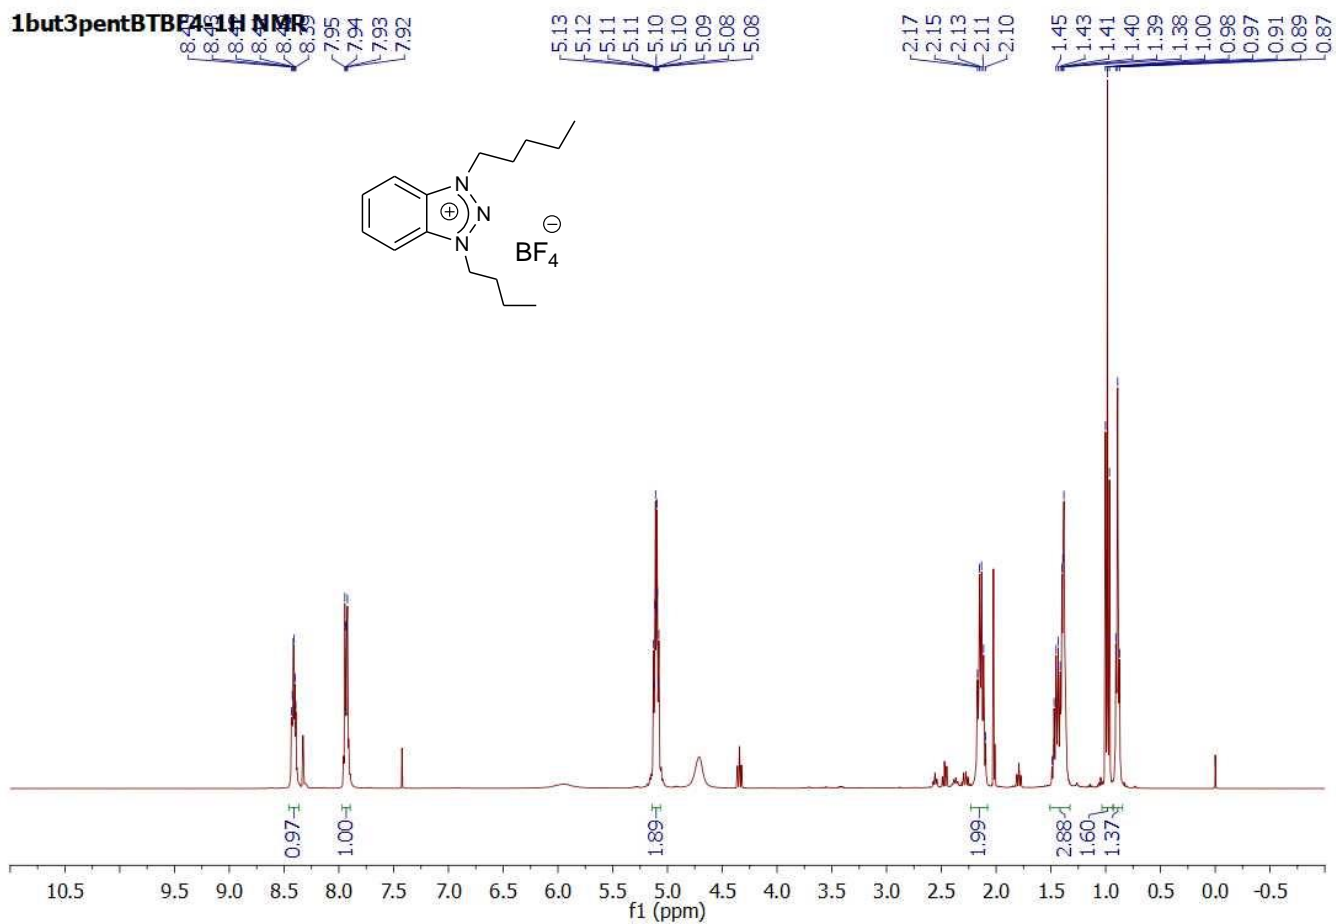

**Figure S26.** 1but3pentBTBF<sub>4</sub>-<sup>1</sup>H NMR

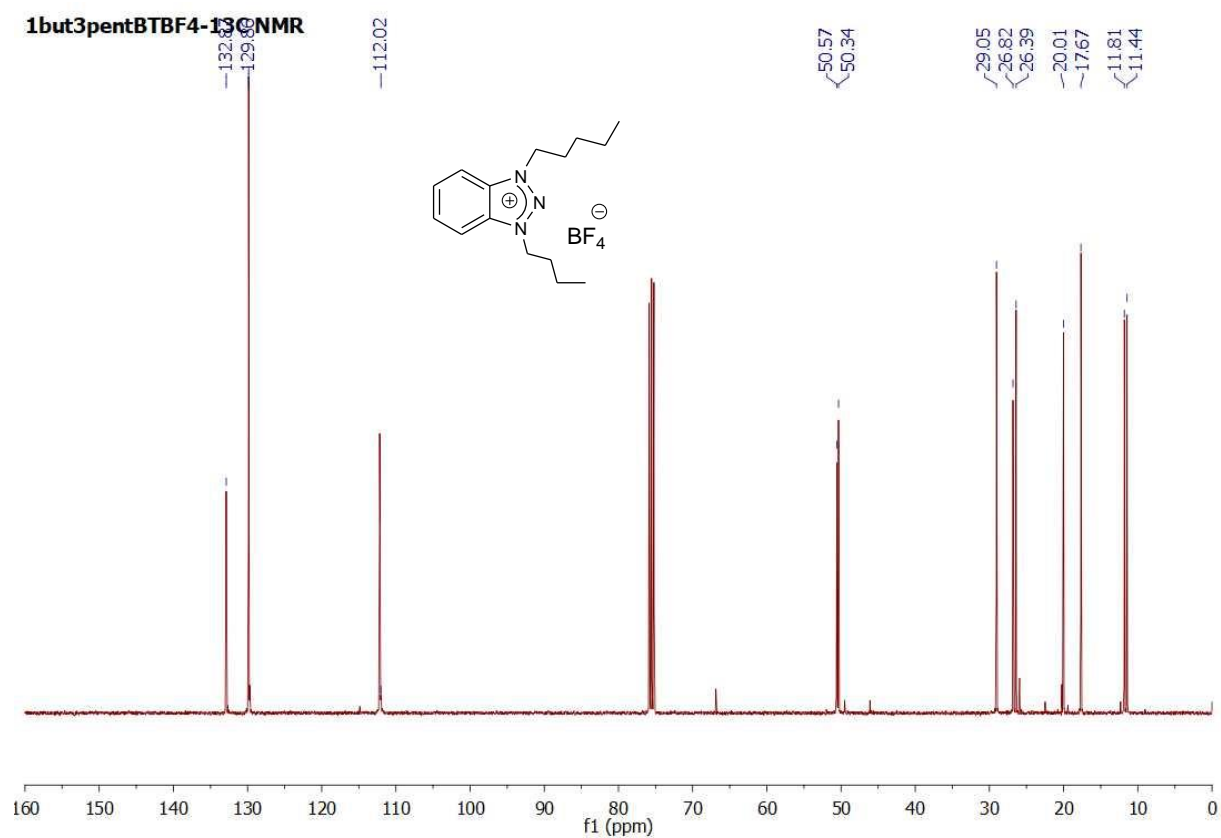

**Figure S27.** 1but3pentBTBF<sub>4</sub>-<sup>13</sup>C NMR

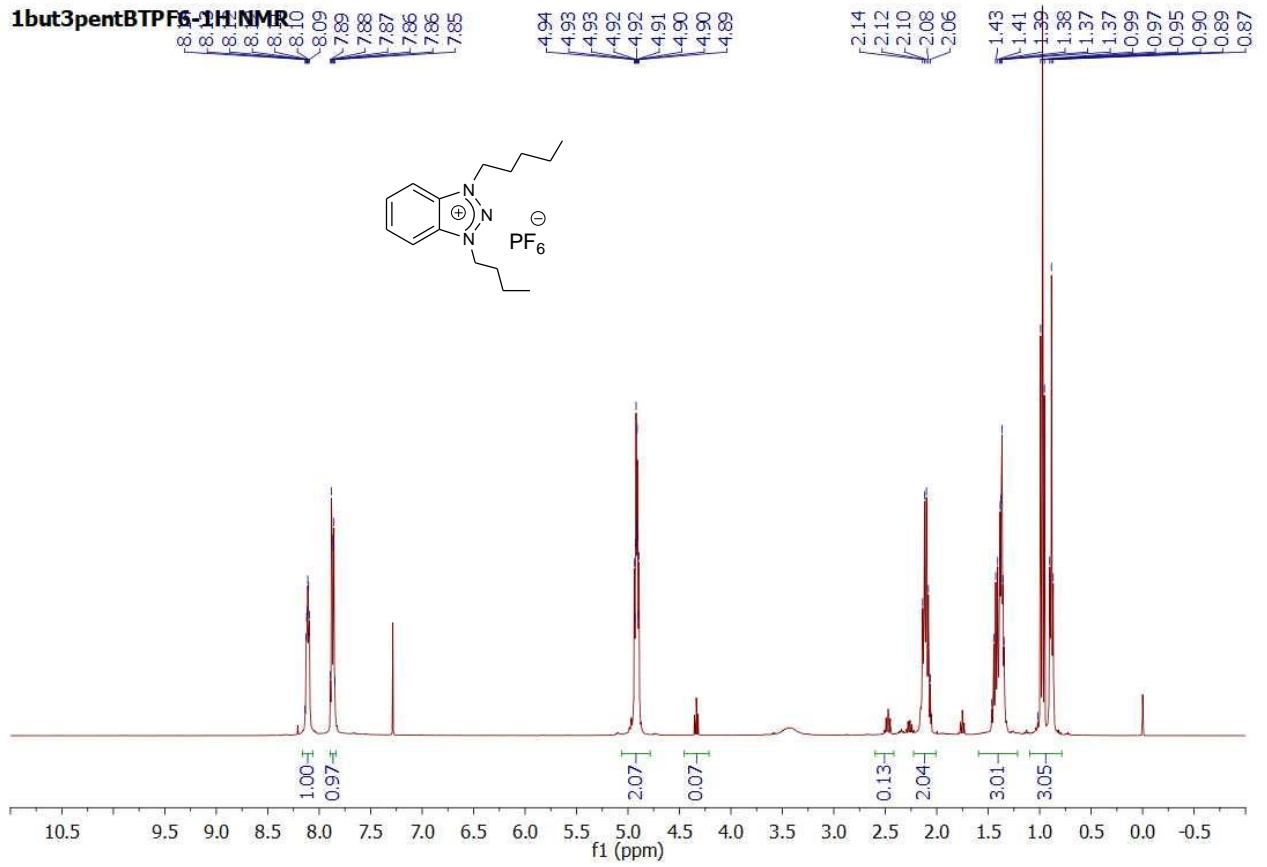

**Figure S28.1but3pentBTPF<sub>6</sub>-<sup>1</sup>H NMR**

1but3pentBTPF6-13C NMR

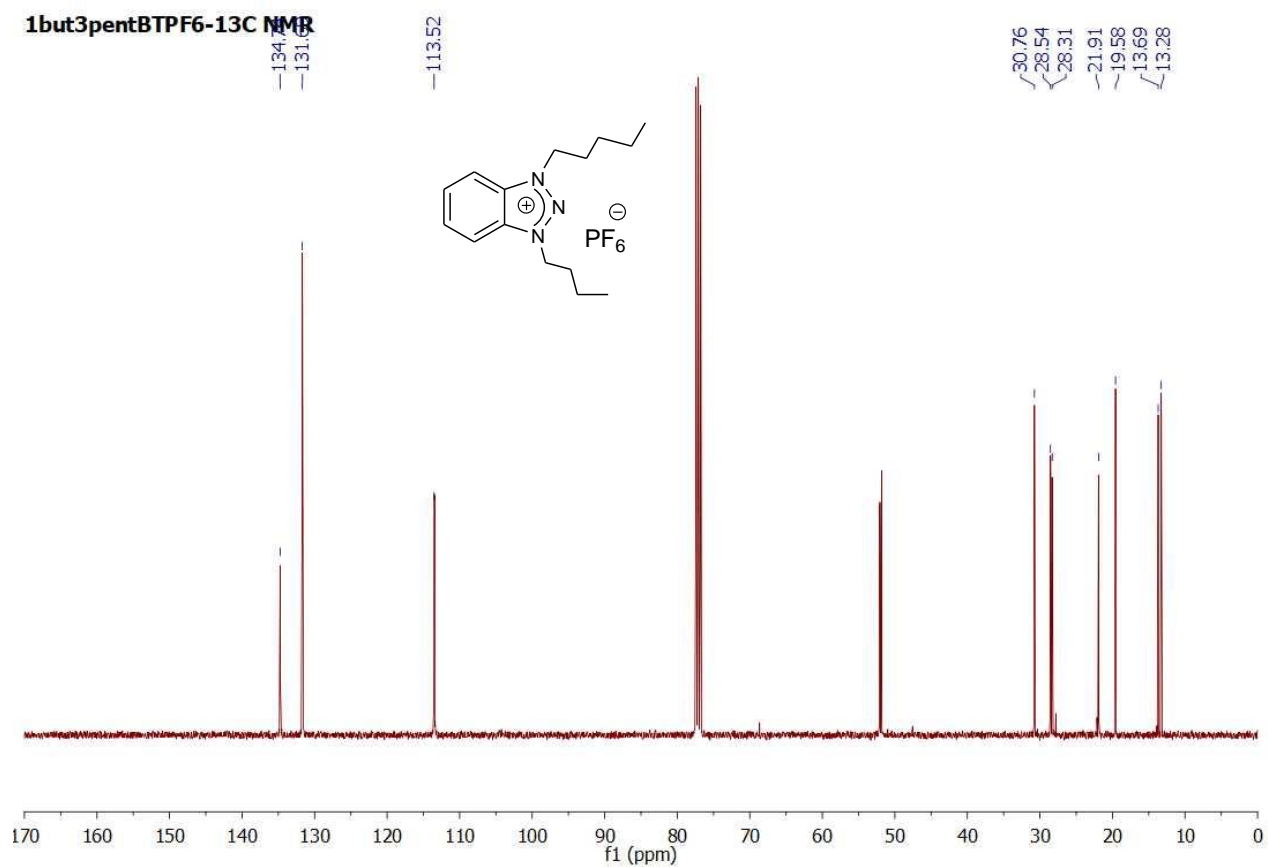

Figure S29.1but3pentBTPF<sub>6</sub>-<sup>13</sup>C NMR

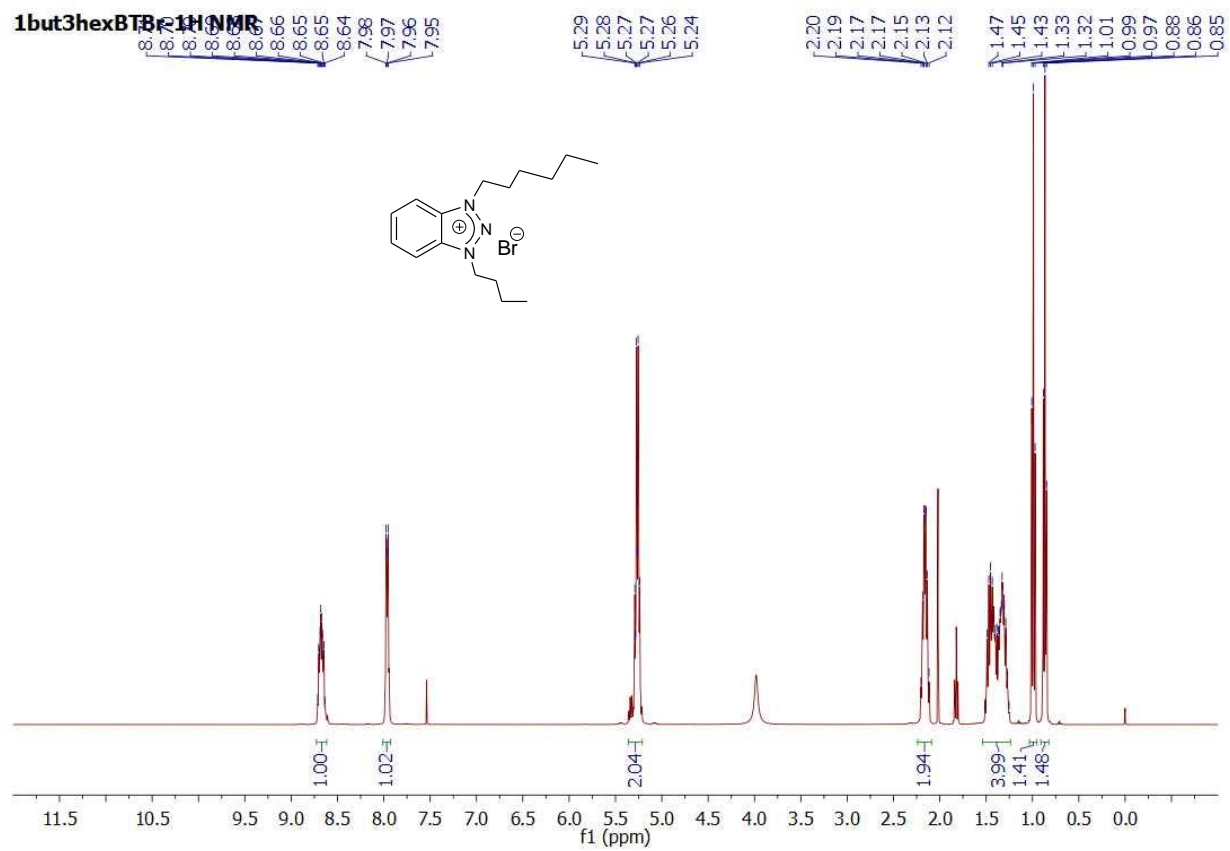

**Figure S30.1but3hexBTBr-<sup>1</sup>H NMR**

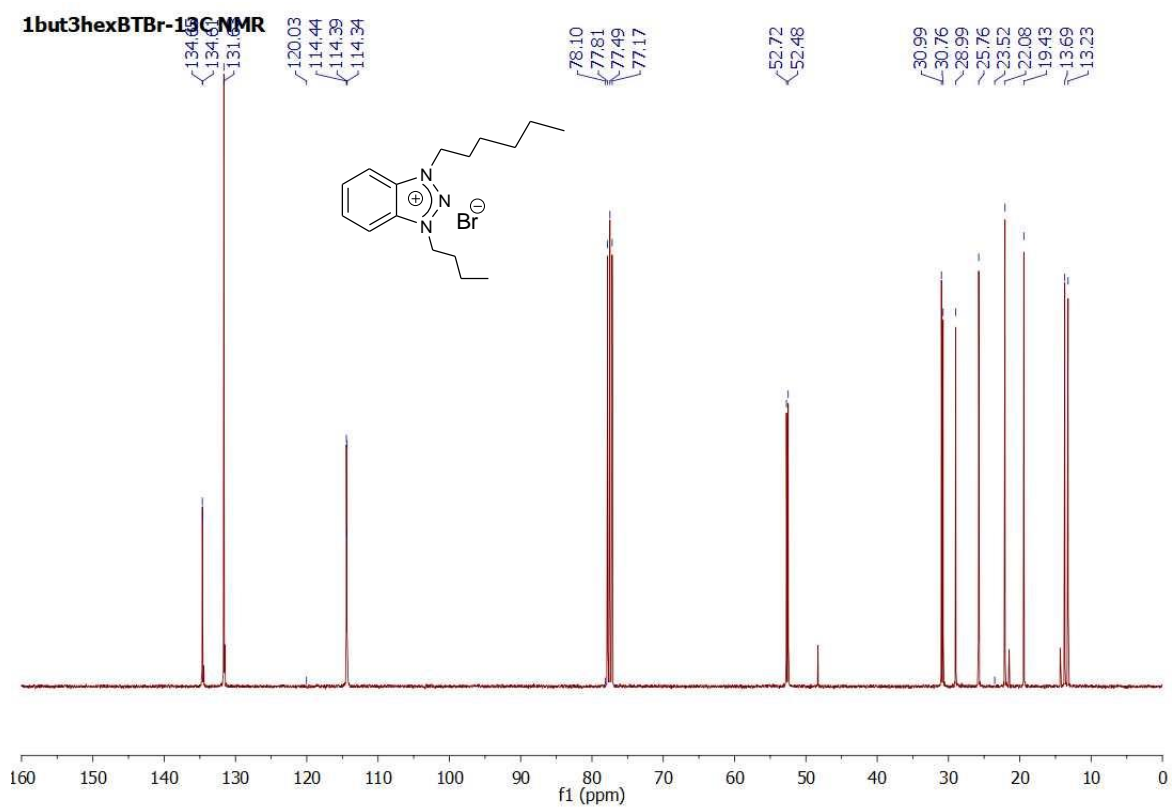

**Figure S31.** 1but3hexBTBr-<sup>13</sup>C NMR

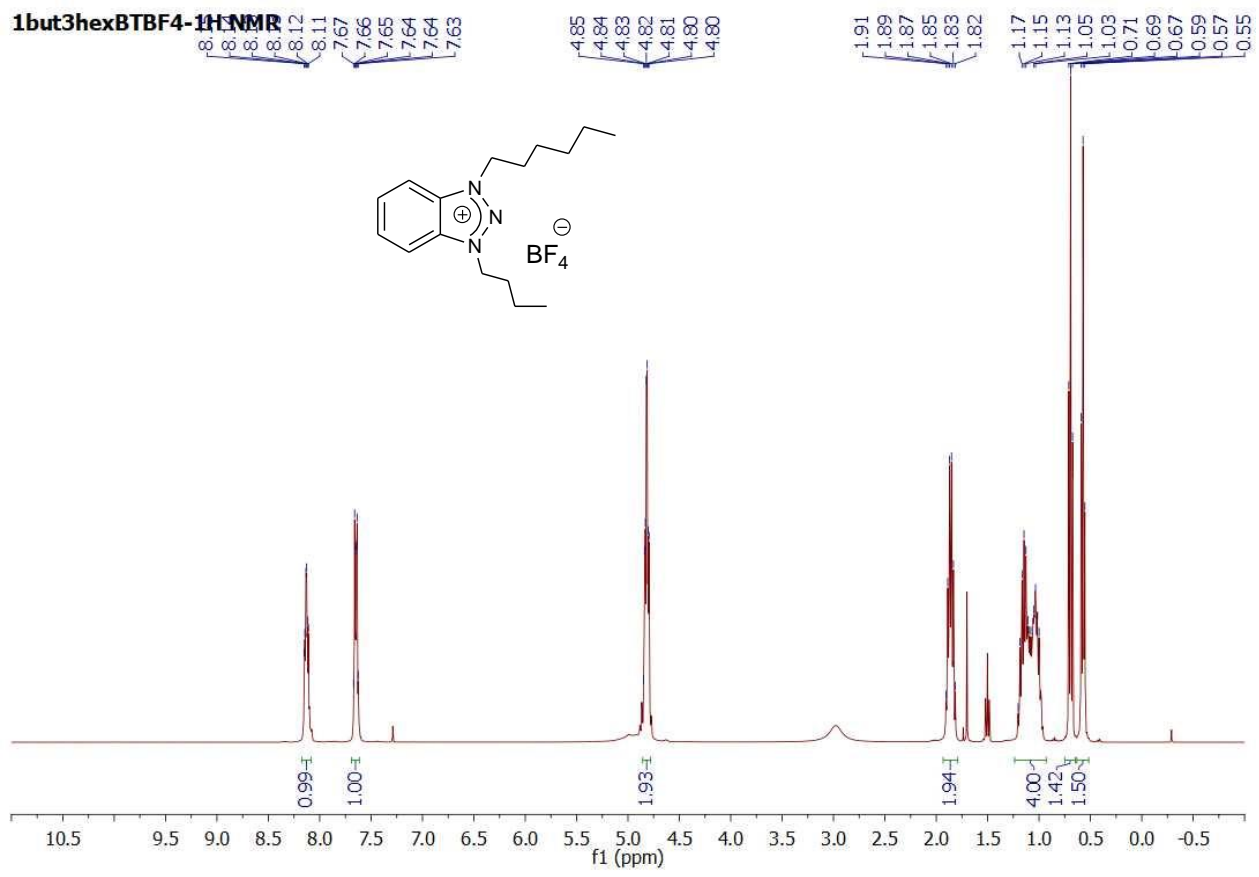

**Figure S32.** 1but3hexBTBF<sub>4</sub>-<sup>1</sup>H NMR



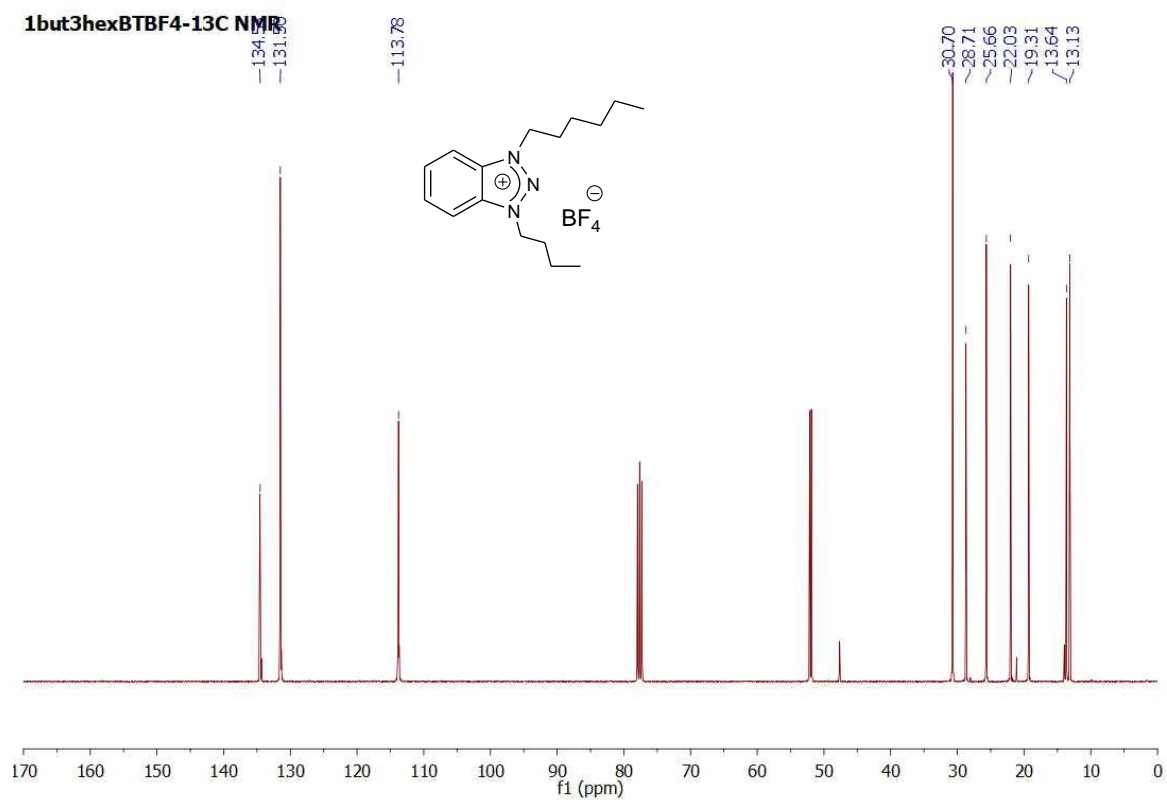

**Figure S33.1but3hexBTBF<sub>4</sub>-<sup>13</sup>C NMR**

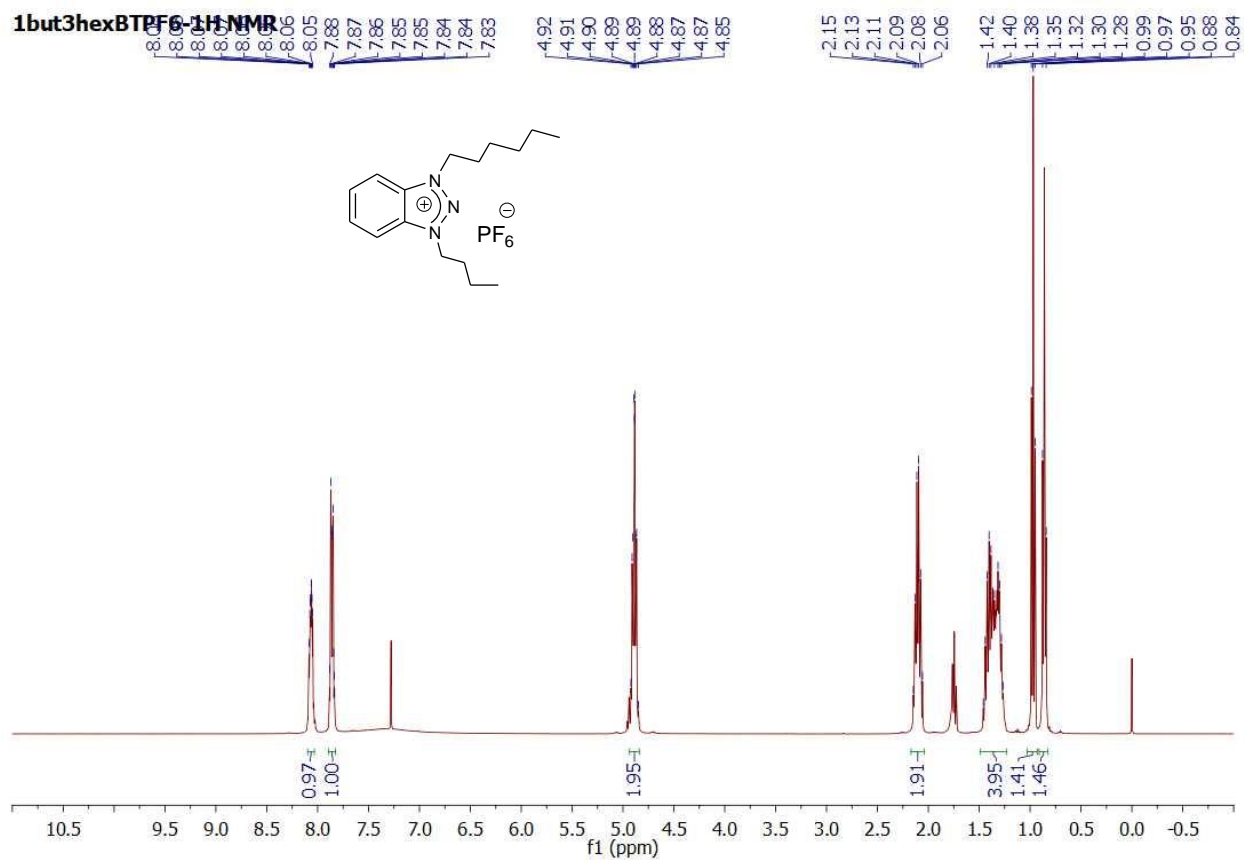

**Figure S34.** 1but3hexBTPF<sub>6</sub>-<sup>1</sup>H NMR

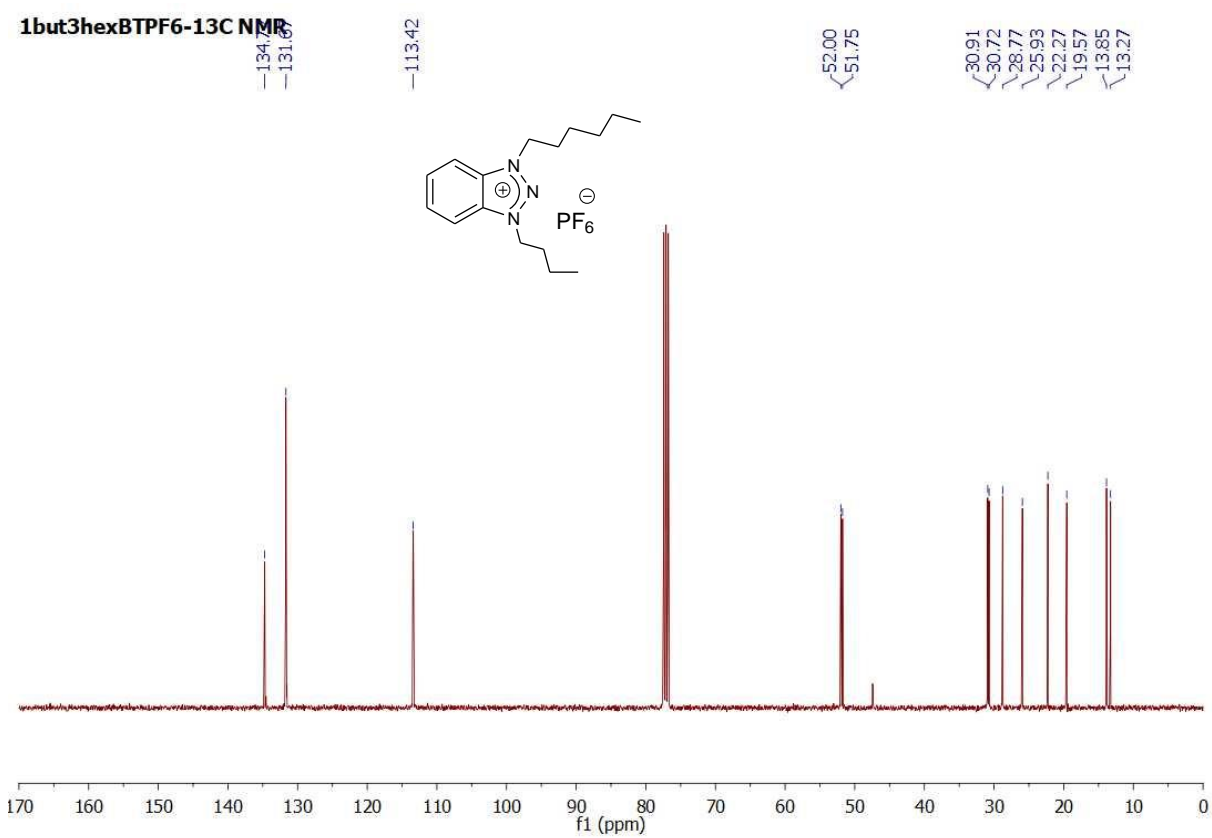

**Figure S35.** 1but3hexBTPF<sub>6</sub>-<sup>13</sup>C NMR

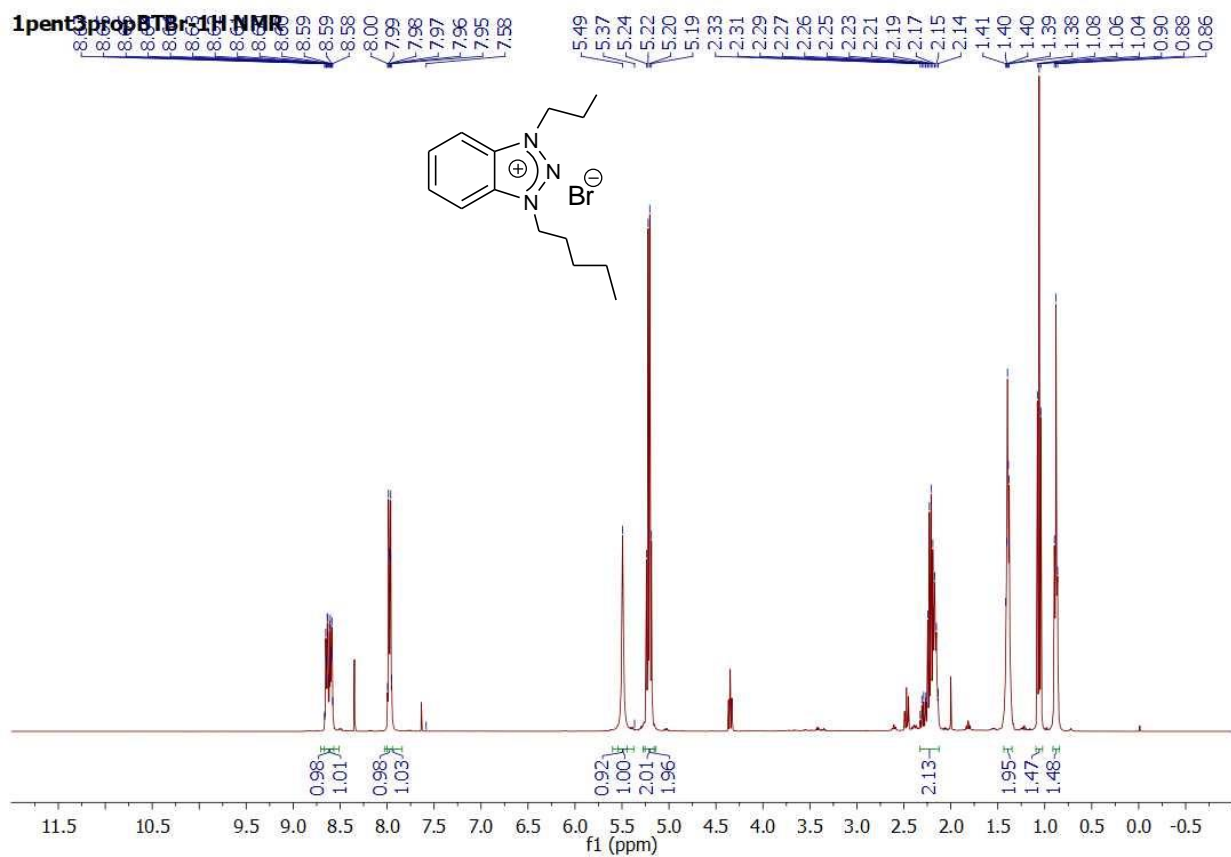

**Figure S36.** 1pent3propBTBr-<sup>1</sup>H NMR

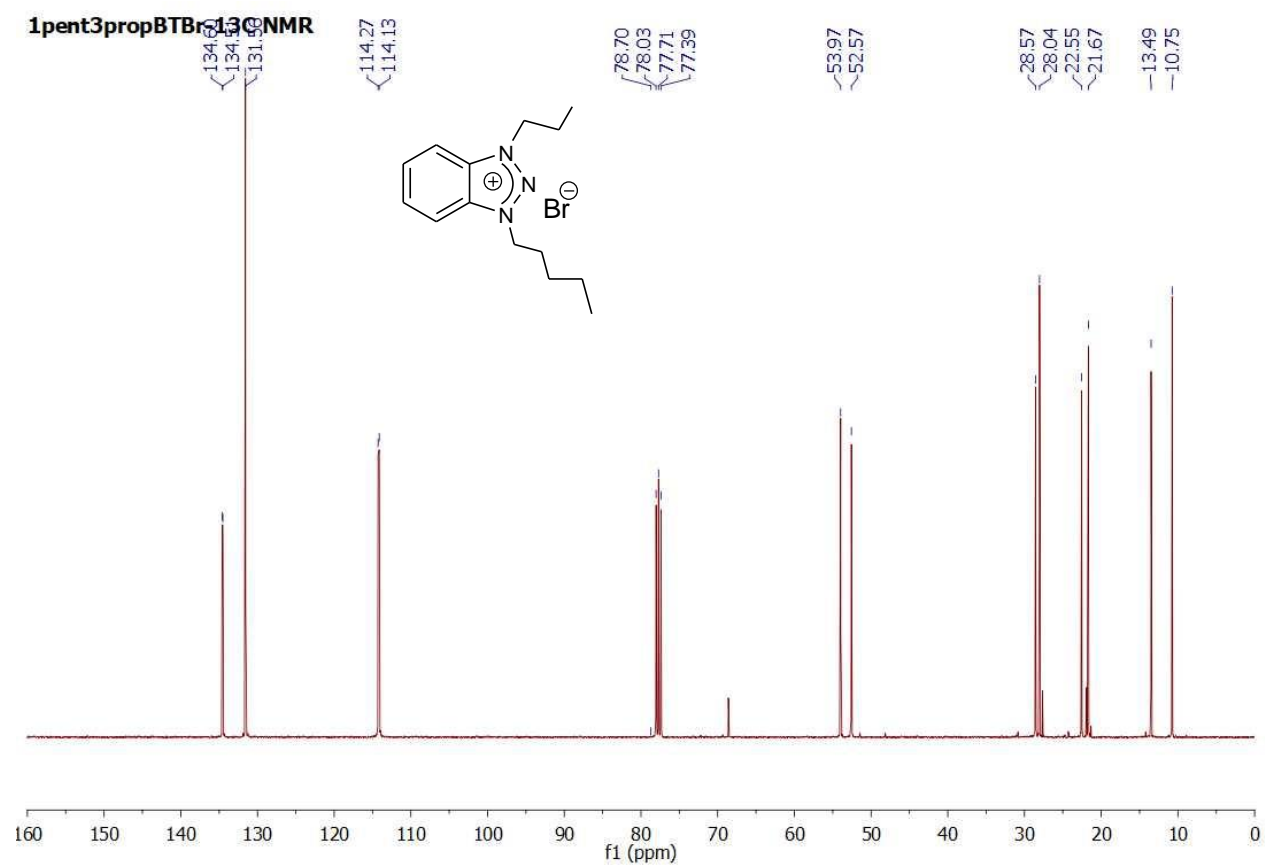

**Figure S37.** 1pent3propBTBr-<sup>13</sup>C NMR

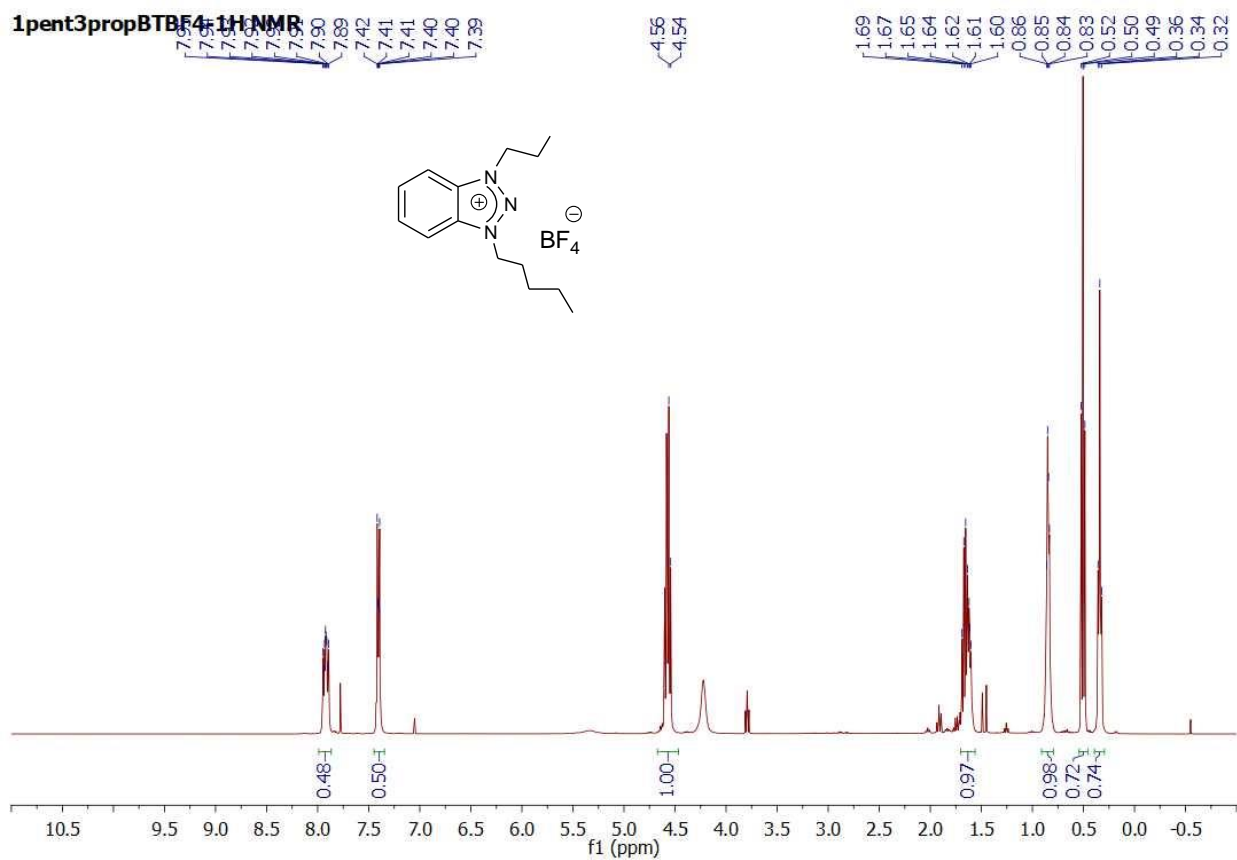

**Figure S38.** 1pent3propBTBF<sub>4</sub>-<sup>1</sup>H NMR

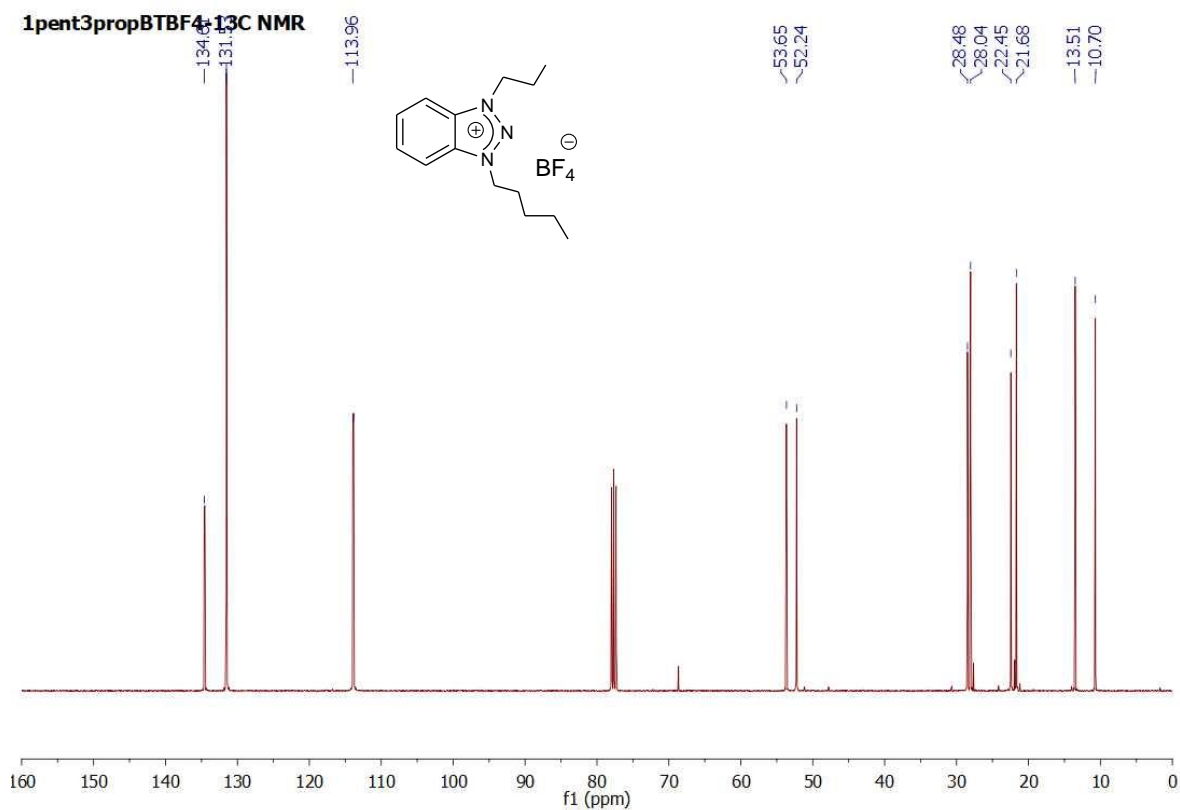

**Figure S39.** 1pent3propBTBF<sub>4</sub>-<sup>13</sup>C NMR

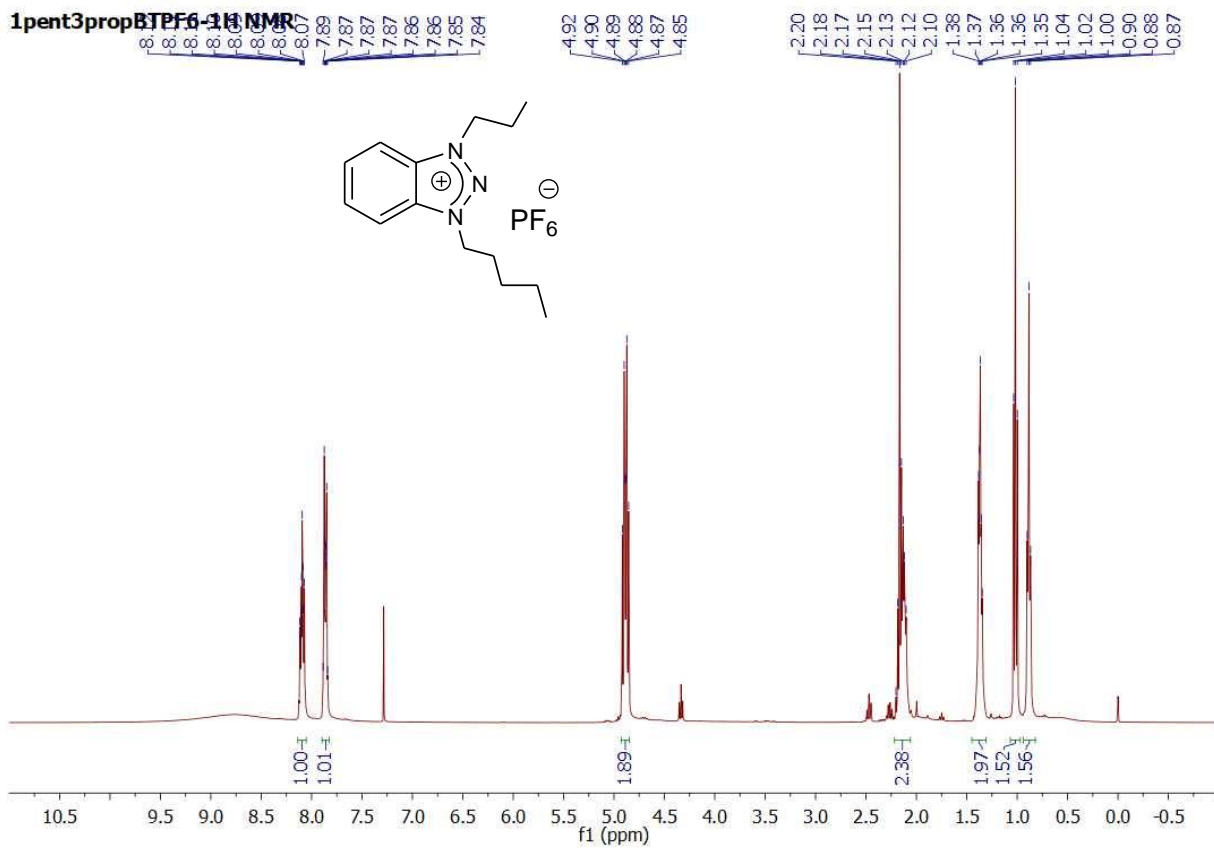

**Figure S40.** 1pent3propBTPF<sub>6</sub>-<sup>1</sup>H NMR



1pent3propBTPF6-13C NMR

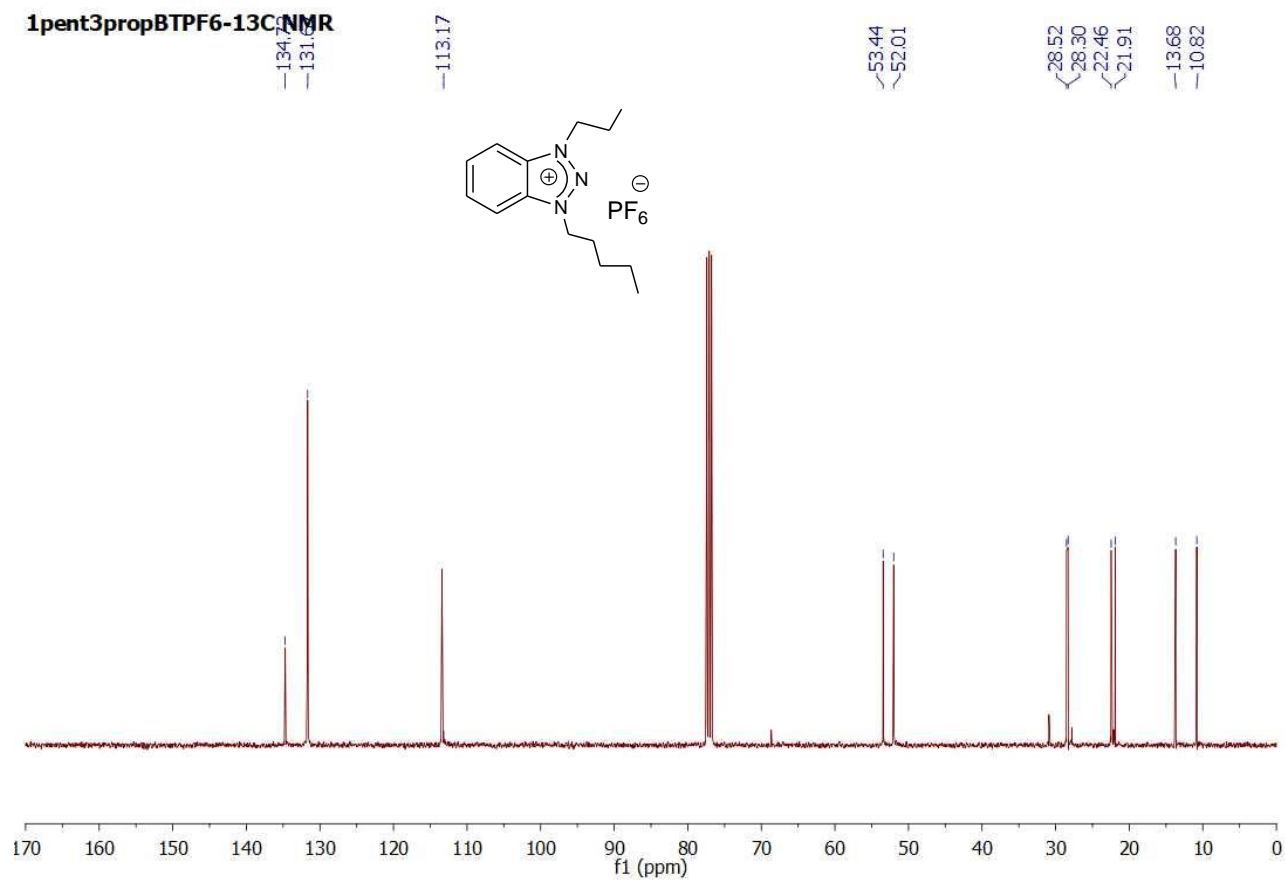

Figure S41. 1pent3propBTPF<sub>6</sub>-<sup>13</sup>C NMR

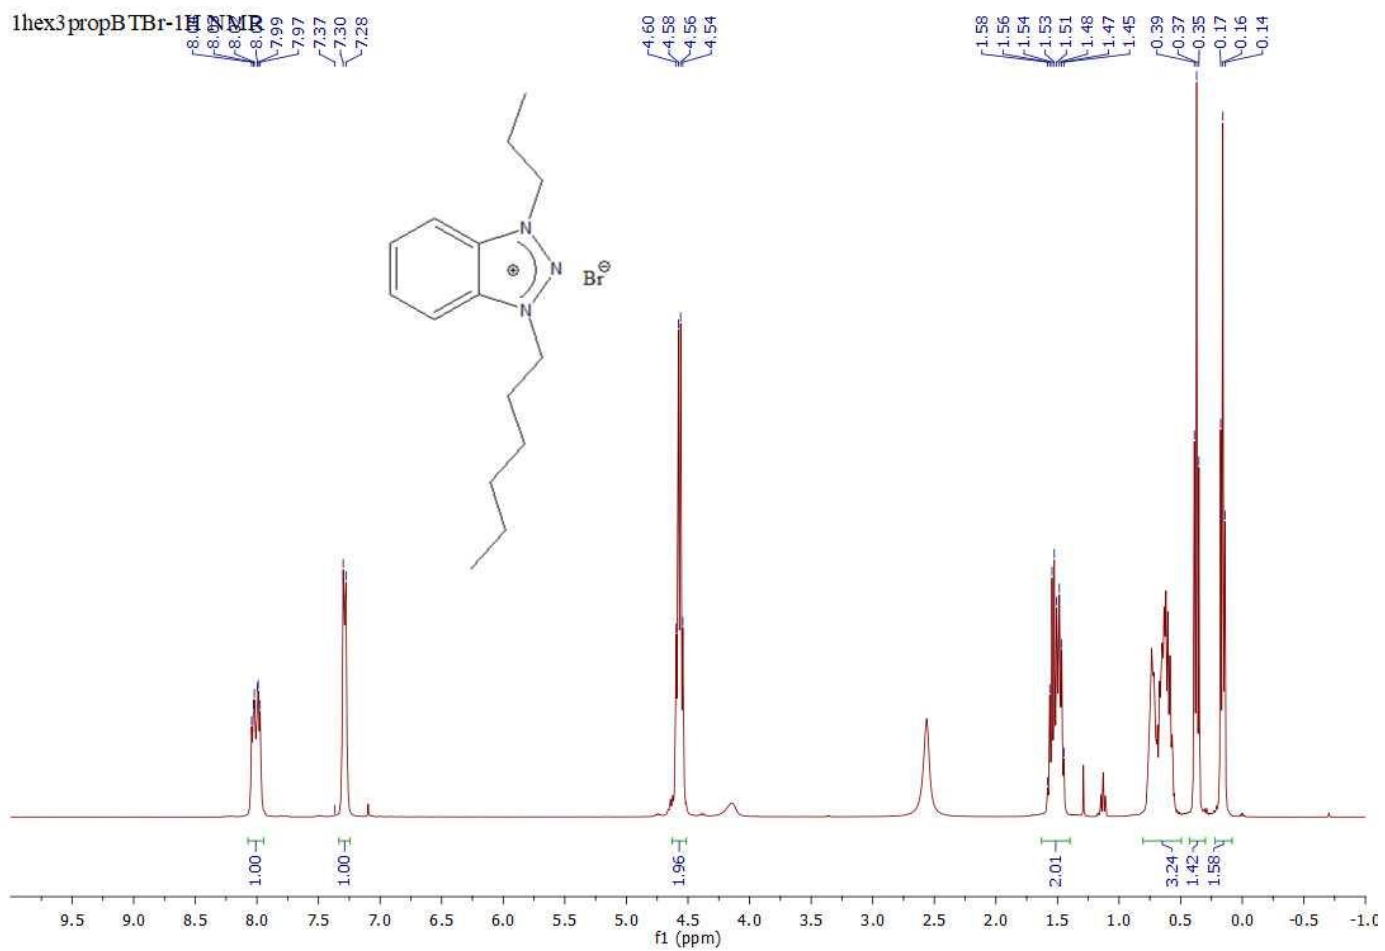

Figure S42. 1hex3propBTBr-<sup>1</sup>H NMR

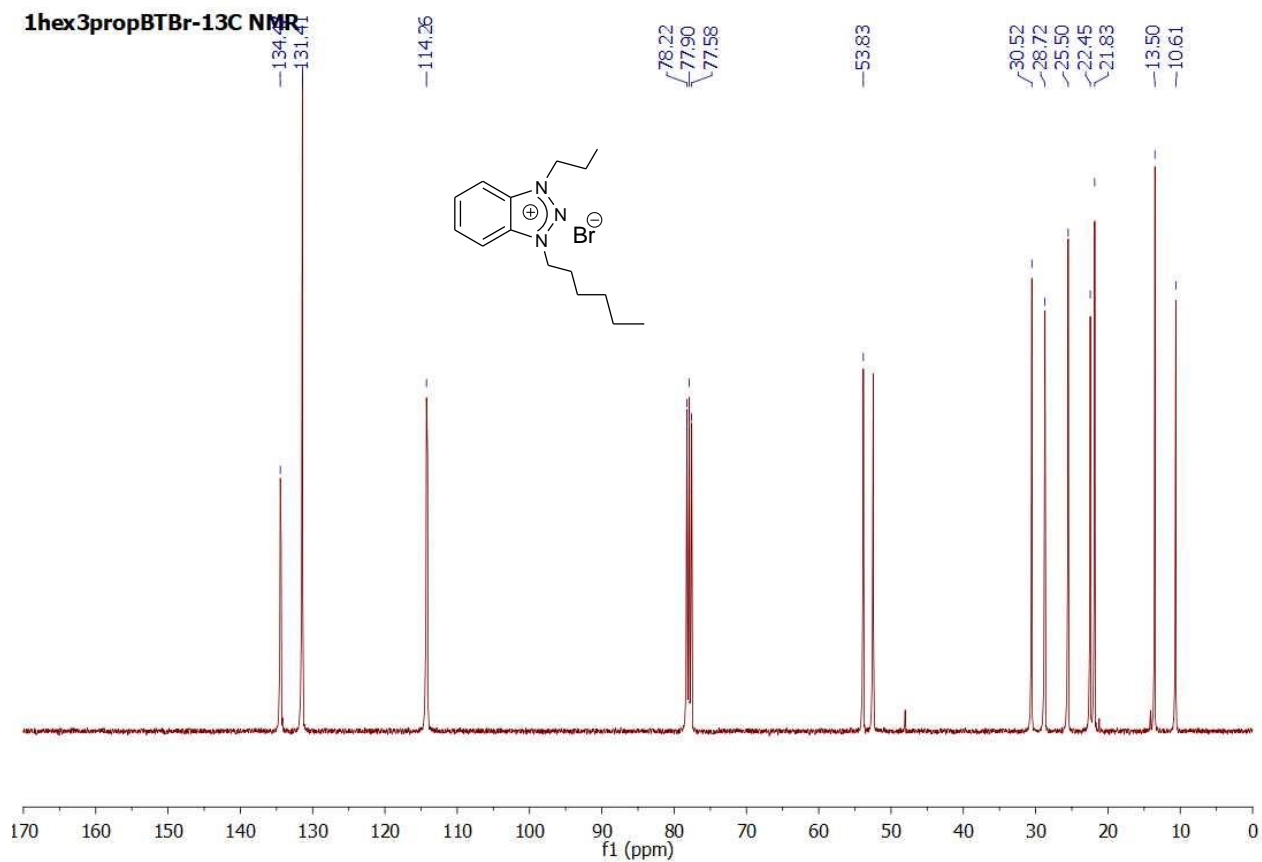

**Figure S43.** 1hex3propBTBr-<sup>13</sup>C NMR

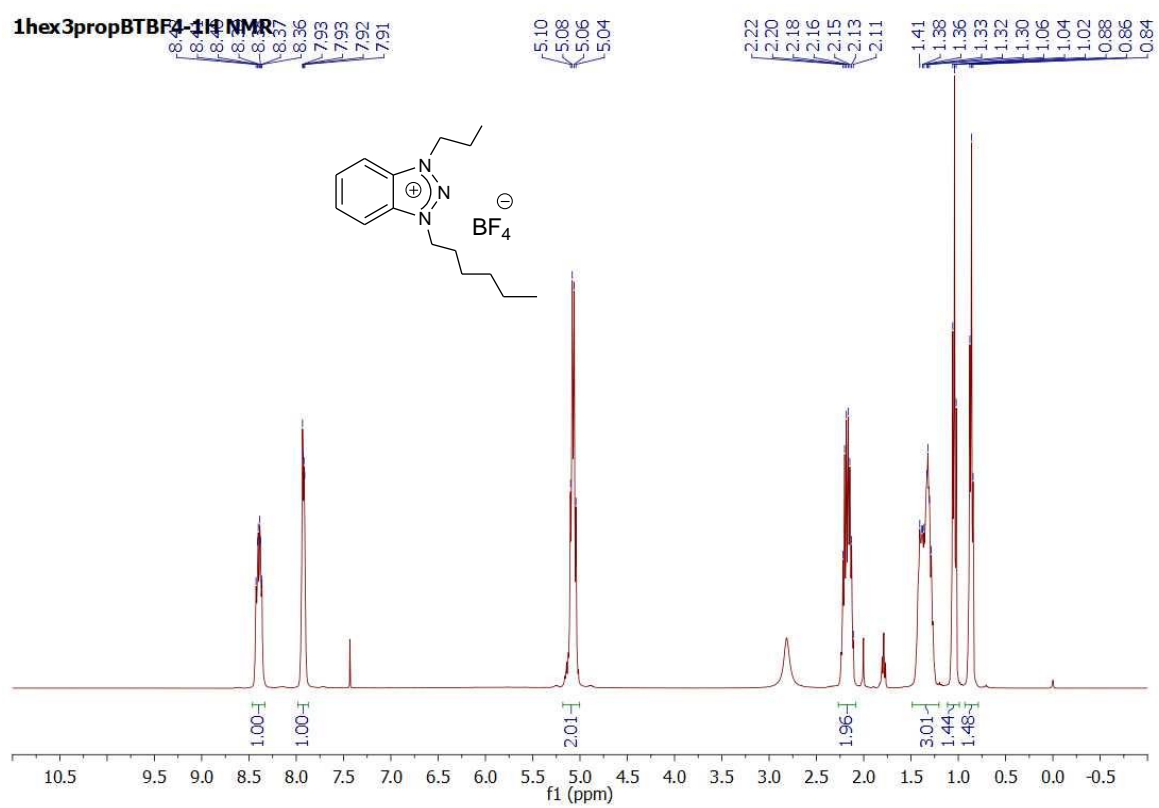

**Figure S44.** 1hex3propBTBF<sub>4</sub>-<sup>1</sup>H NMR

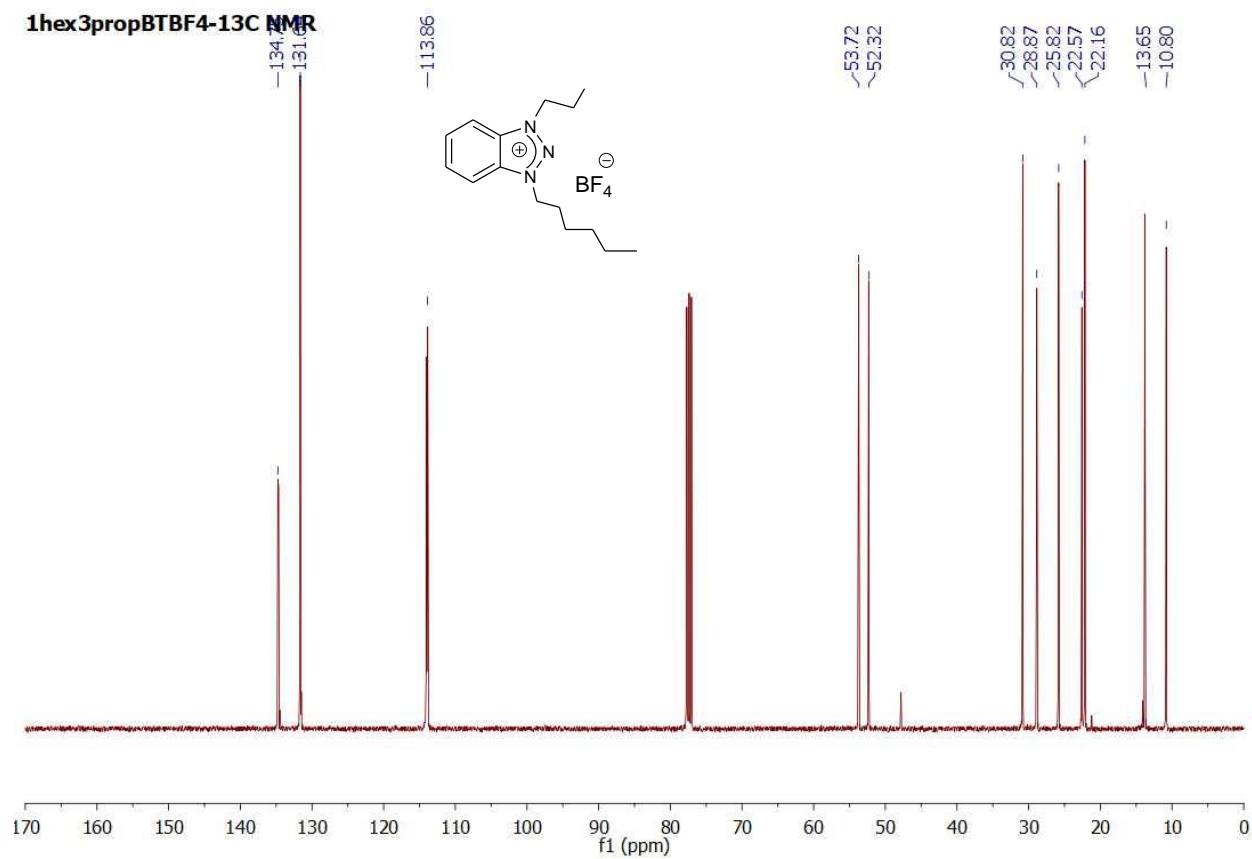

**Figure S45.** 1hex3propBTBF<sub>4</sub>-<sup>13</sup>C NMR

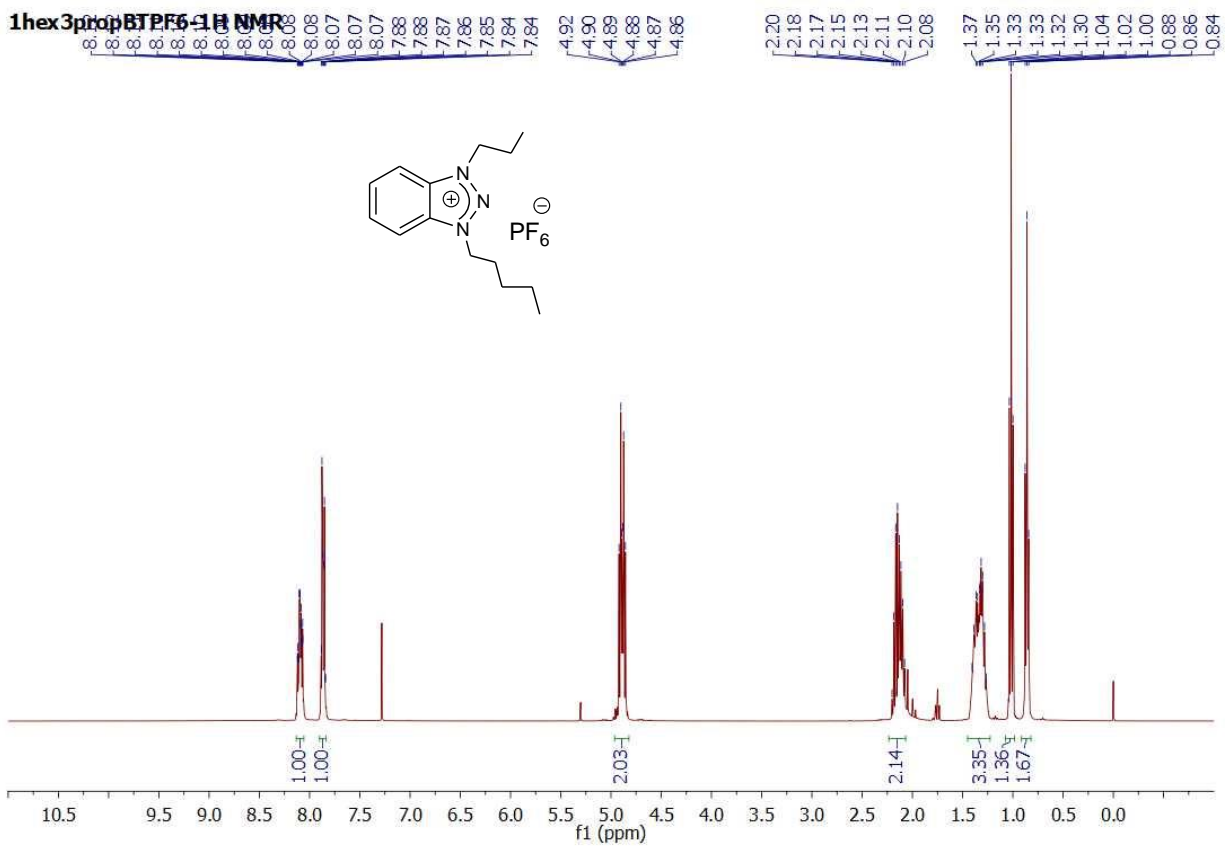

**Figure S46.** 1hex3propBTPF<sub>6</sub>-<sup>1</sup>H NMR

**1hex3propBTPF6-13C NMR**

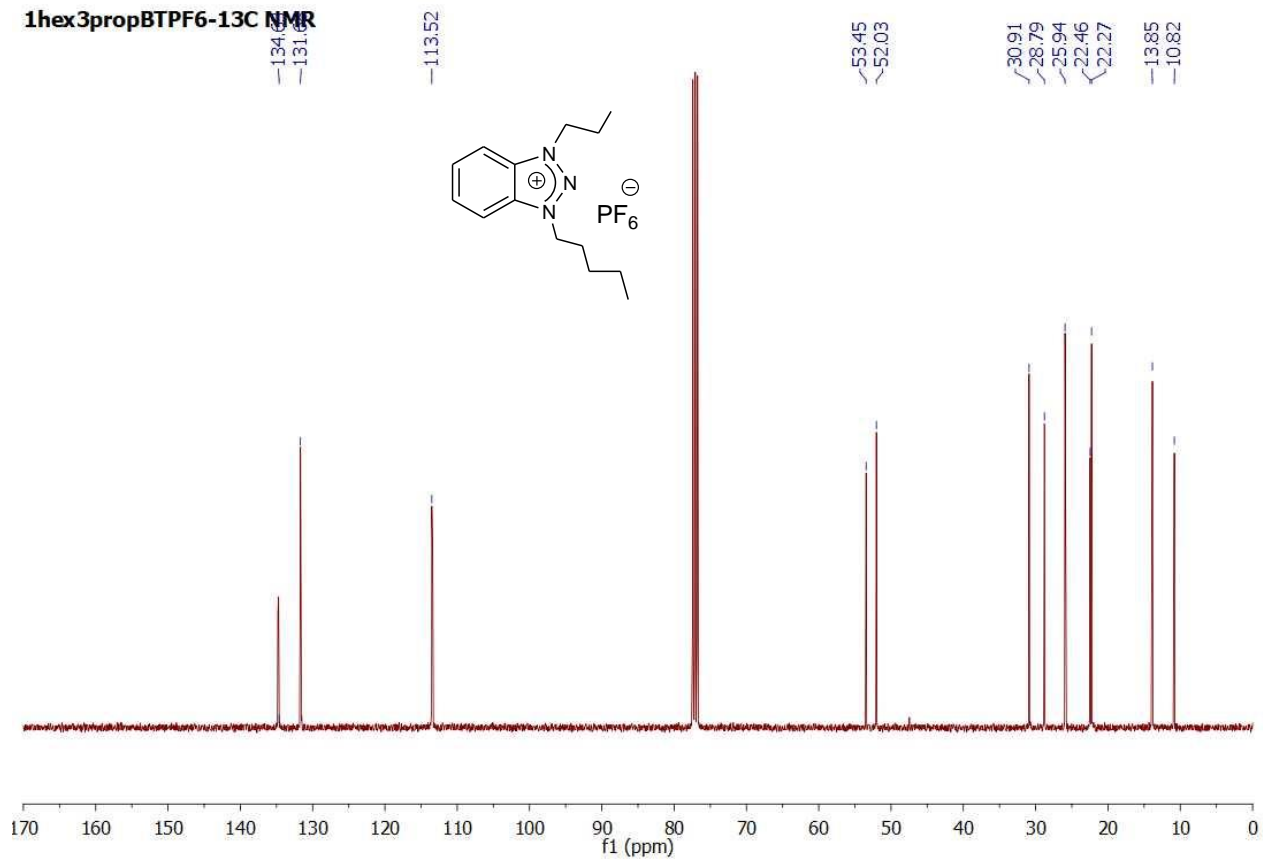

**Figure S47.** 1hex3propBTPF<sub>6</sub>-<sup>13</sup>C NMR

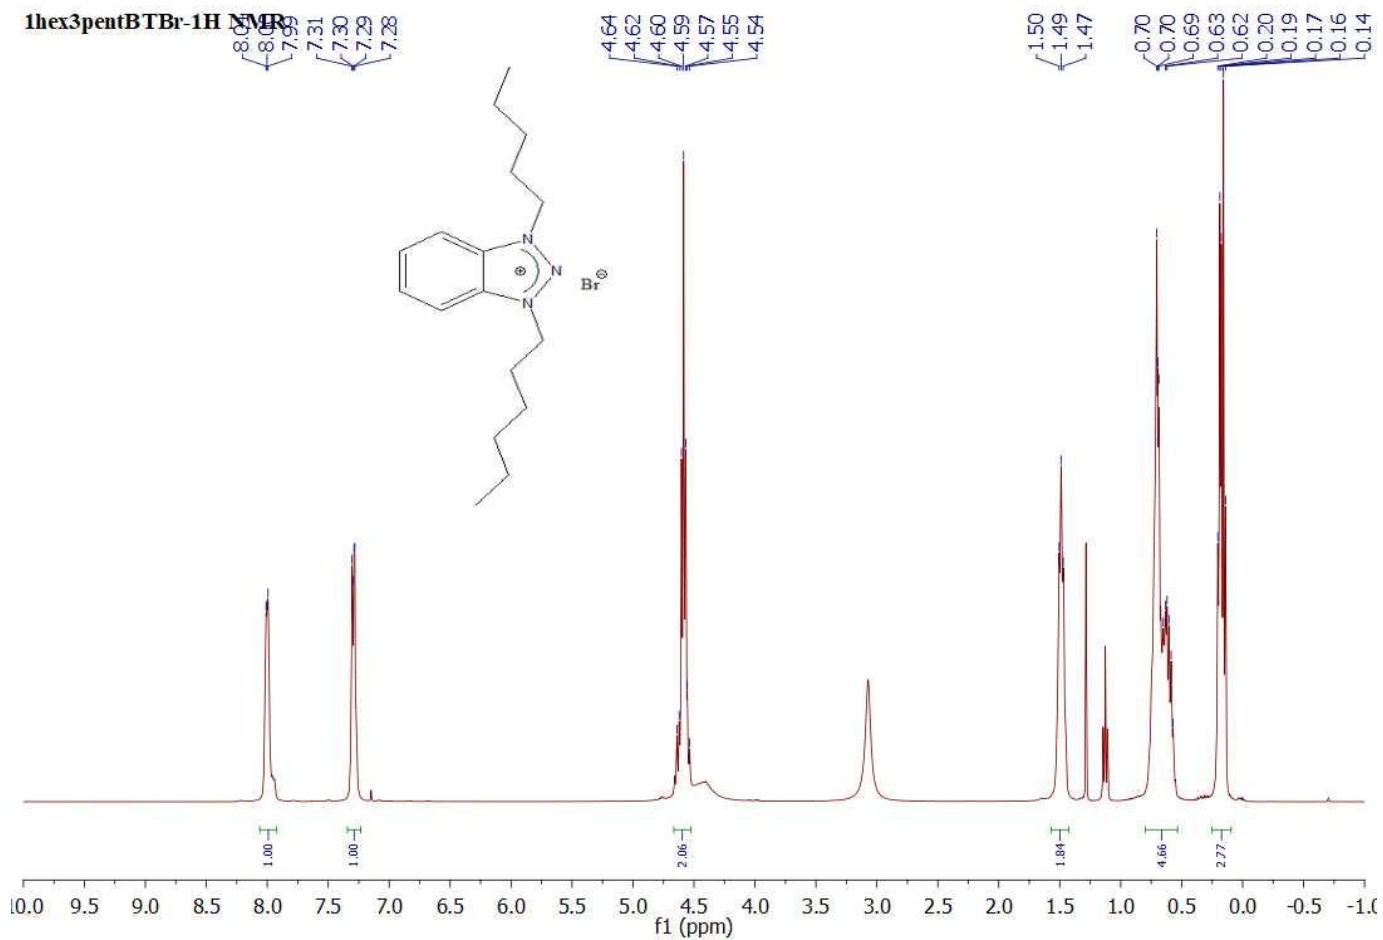

**Figure S48.** 1hex3pentBTBr- $^1H$  NMR



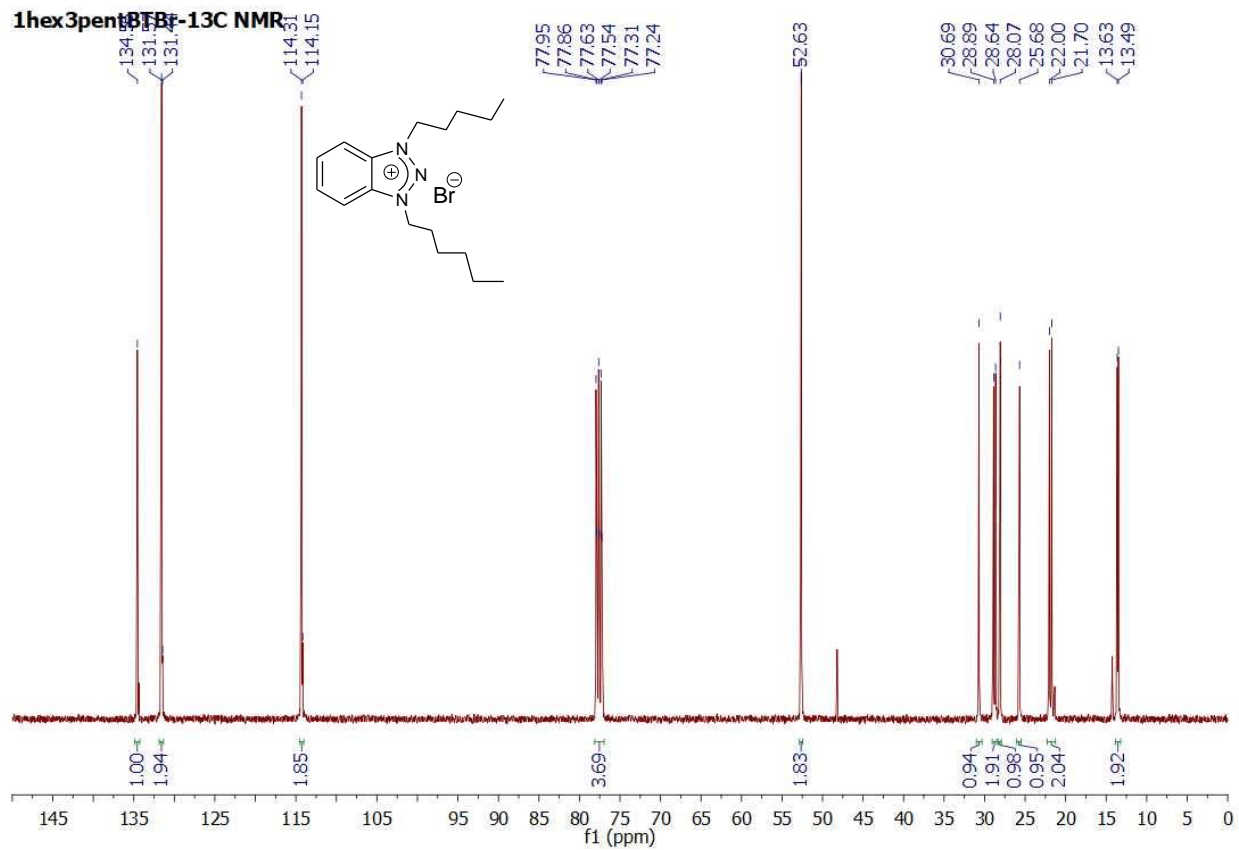

**Figure S49.** 1hex3pentBTBr-<sup>13</sup>C NMR

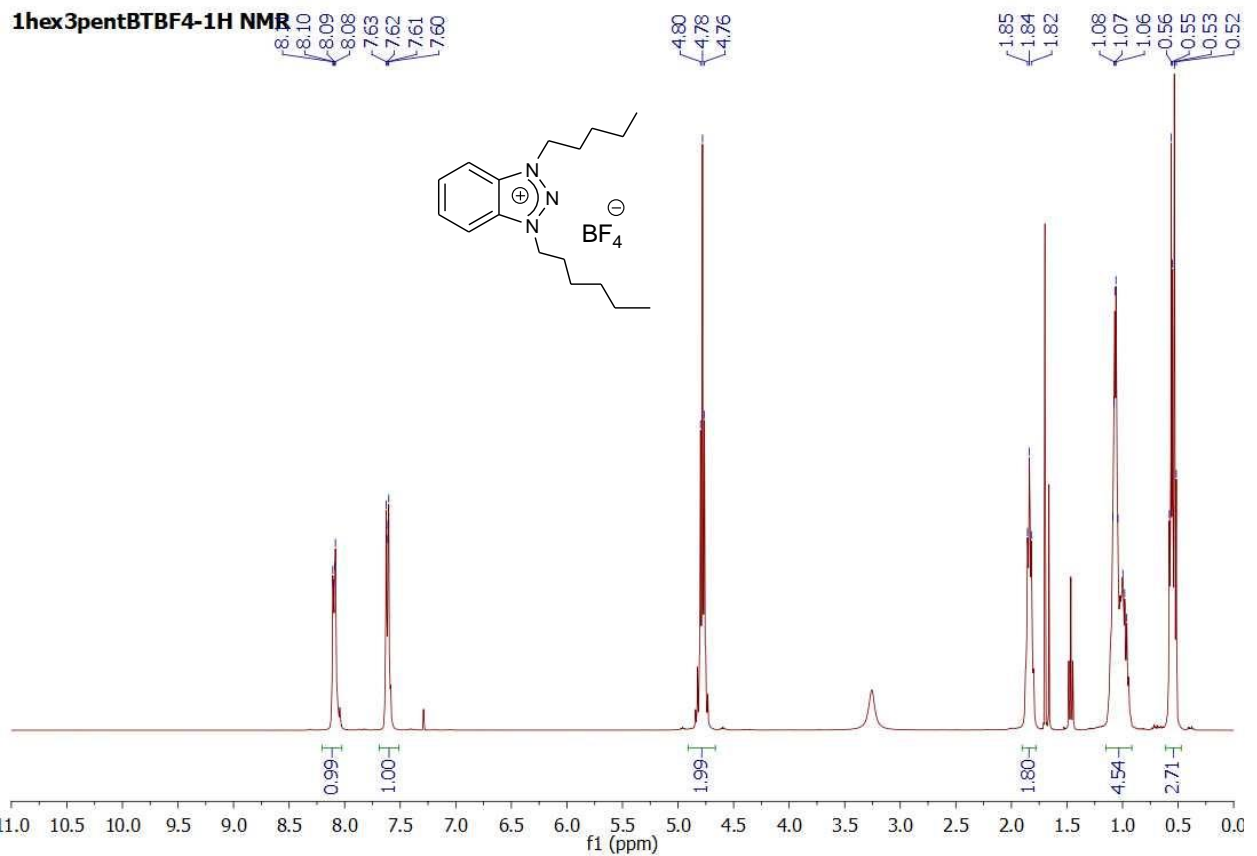

**Figure S50.** 1hex3pentBTBF<sub>4</sub>-<sup>1</sup>H NMR

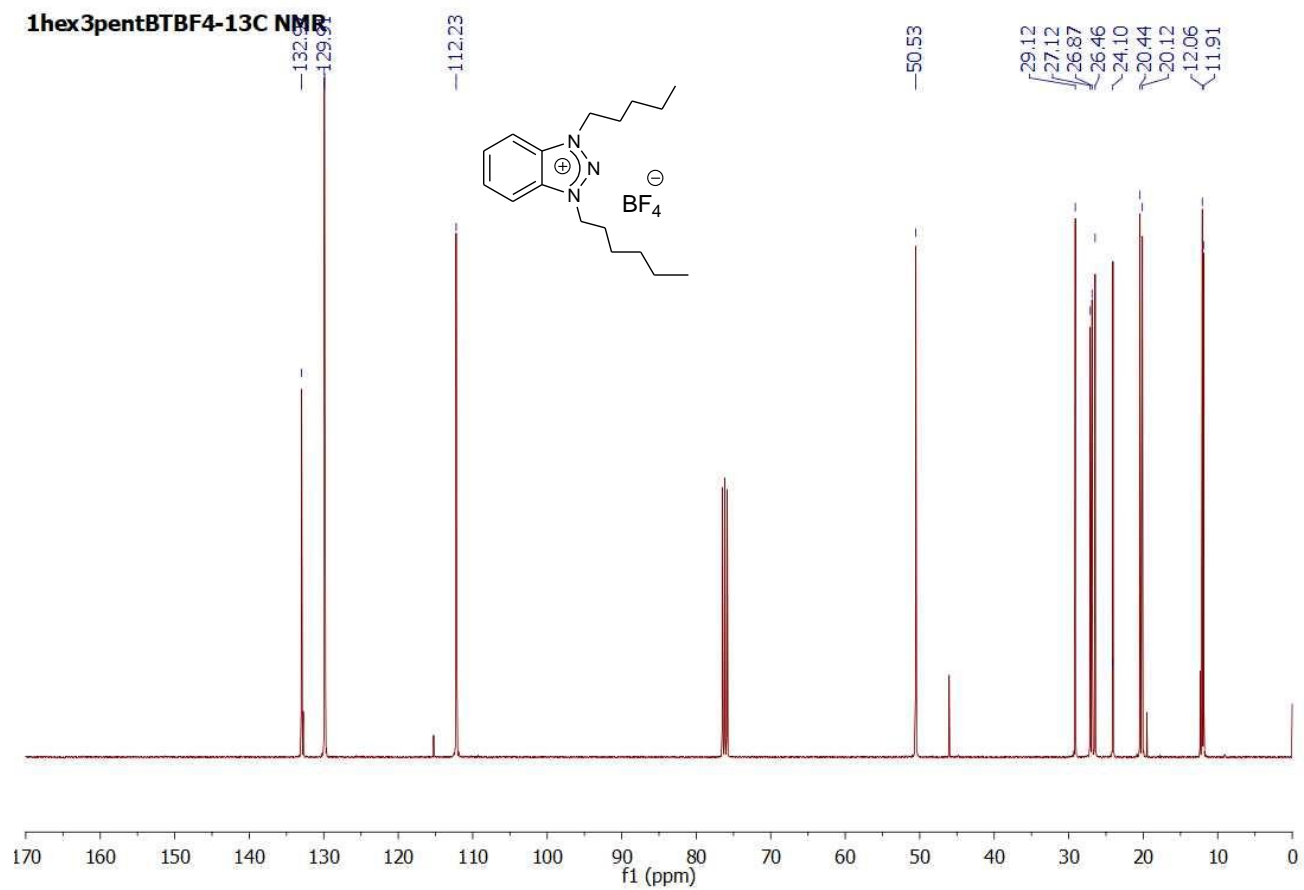

**Figure S51.** 1hex3pentBTBF<sub>4</sub>-<sup>13</sup>C NMR

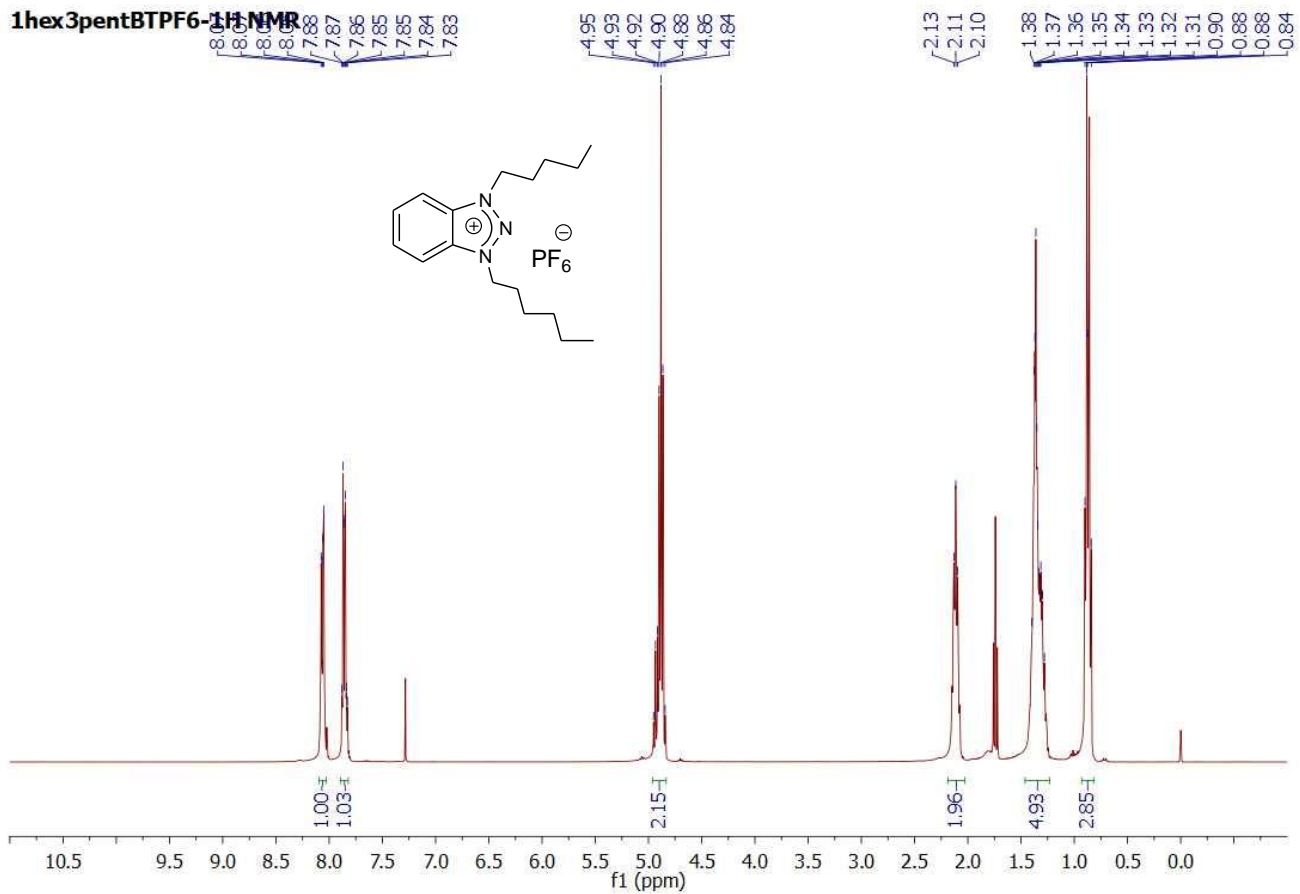

**Figure S52.** 1hex3pentBTPF<sub>6</sub>-<sup>1</sup>H NMR

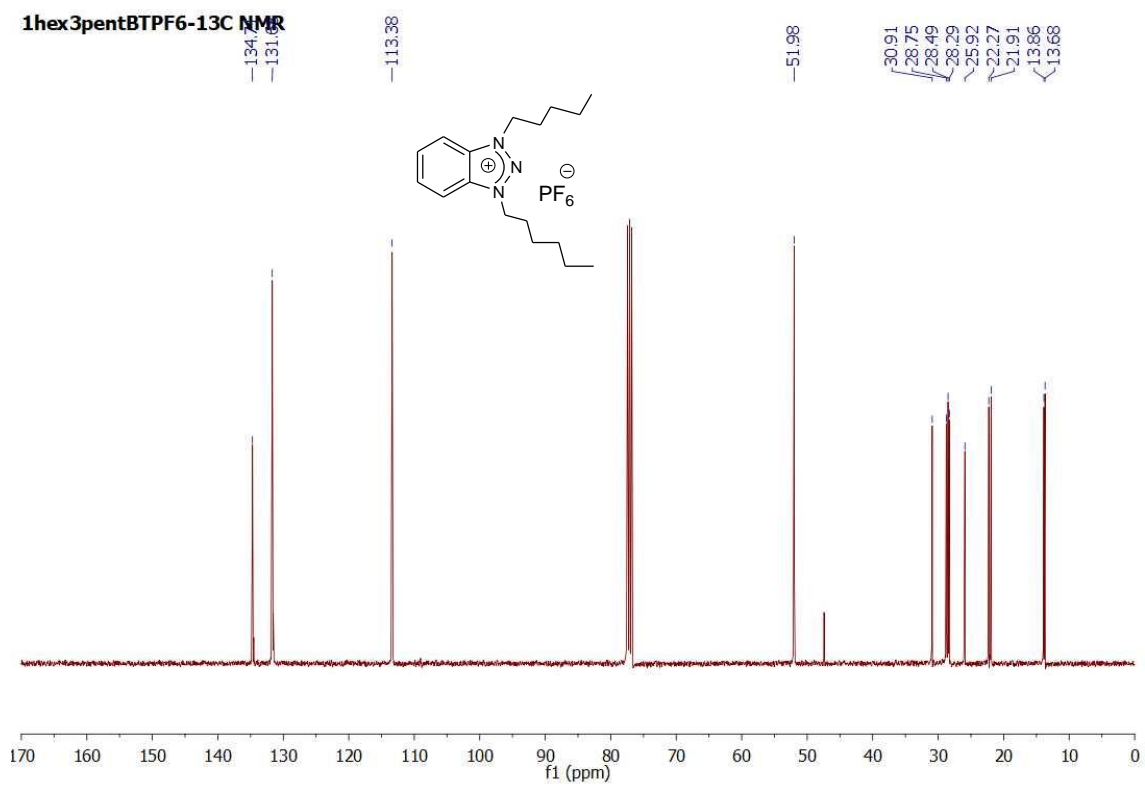

**Figure S53.** 1hex3pentBTPF<sub>6</sub>-<sup>13</sup>C NMR

### S3. FTIR

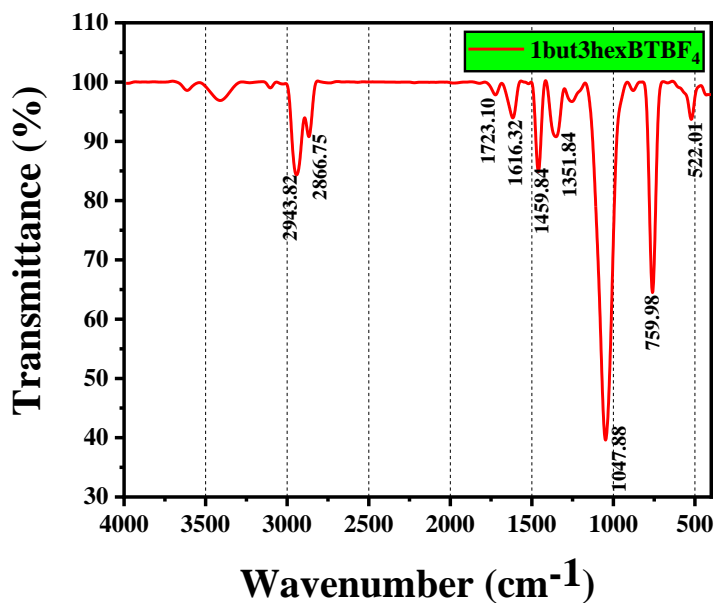

Figure S54. 1but3hexBTBF<sub>4</sub>

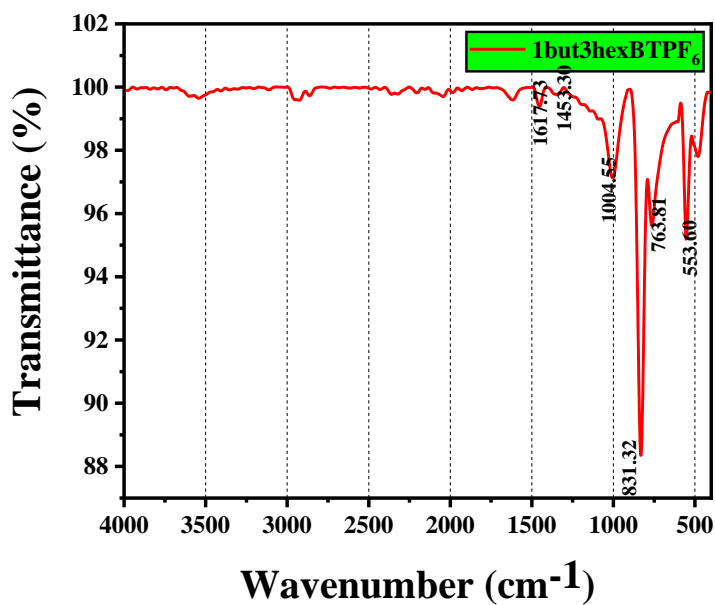

Figure S55. 1but3hexBTPF<sub>6</sub>

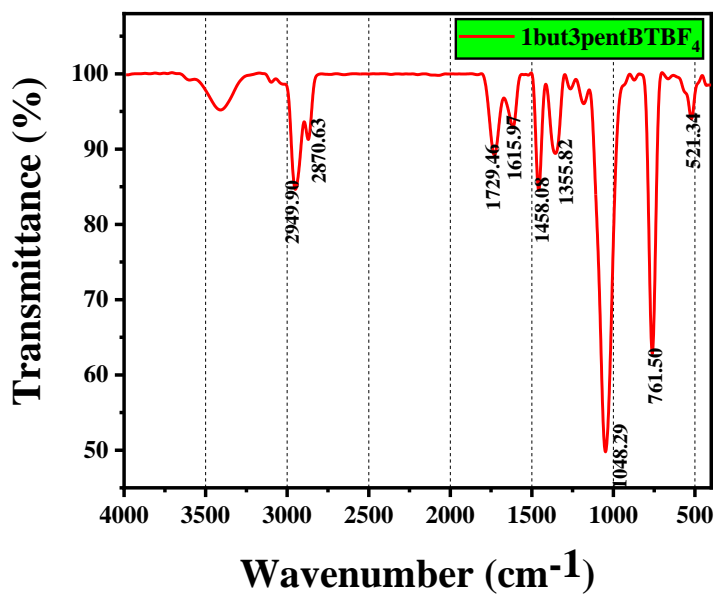

Figure S56. 1but3pentBTBF<sub>4</sub>

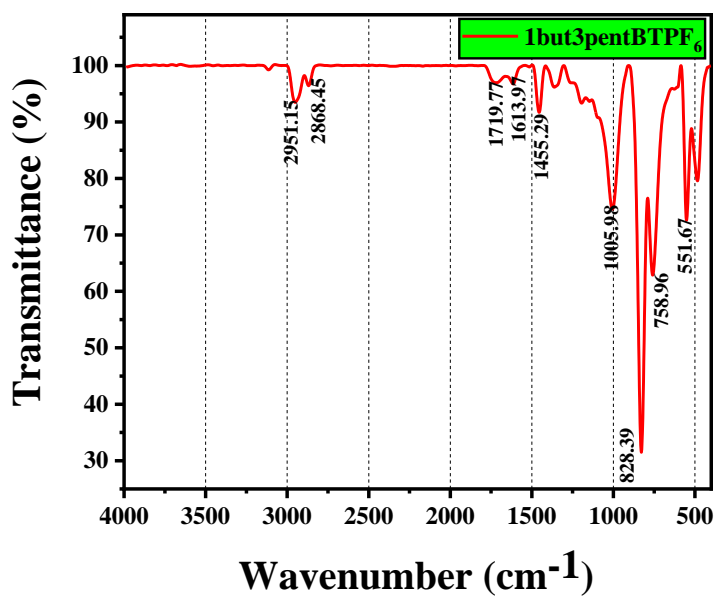

Figure S57. 1but3pentBTPF<sub>6</sub>

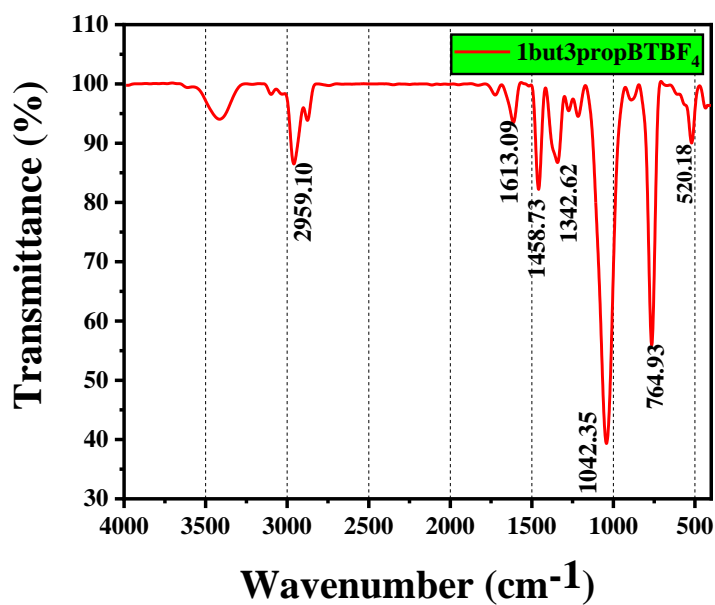

Figure S58. 1but3propBTBF<sub>4</sub>

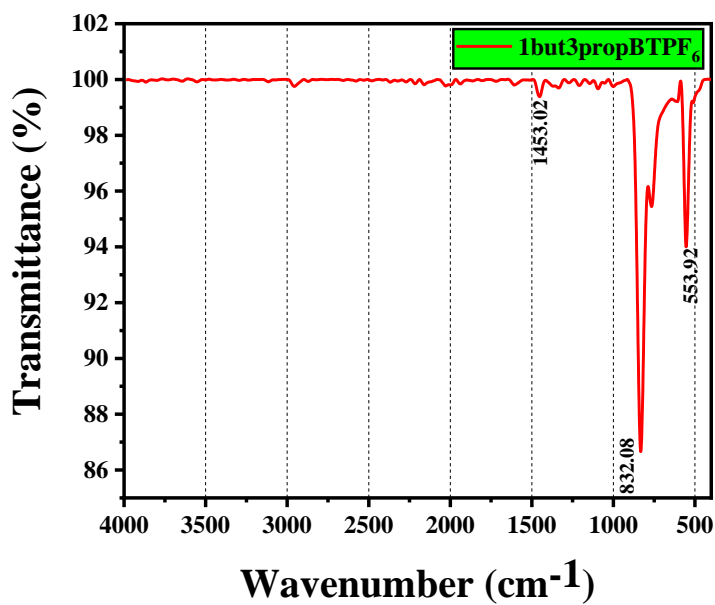

Figure S59. 1but3propBTPF<sub>6</sub>



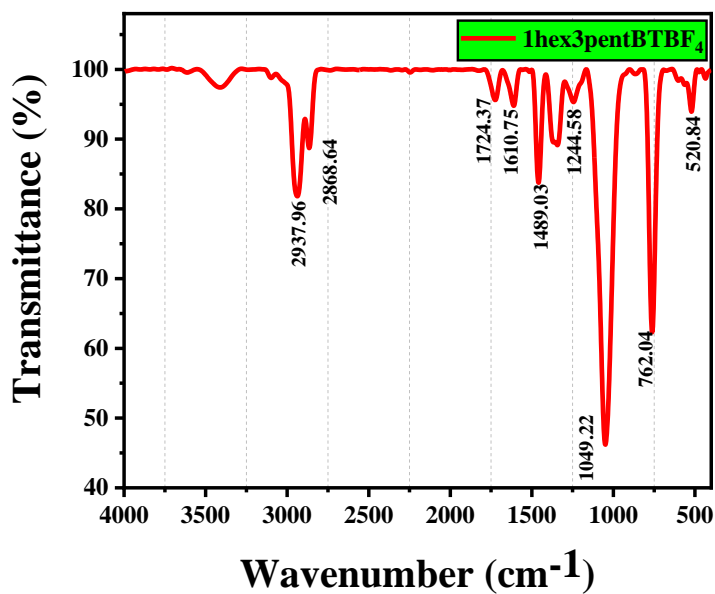

Figure S60. 1hex3pentBTBF<sub>4</sub>

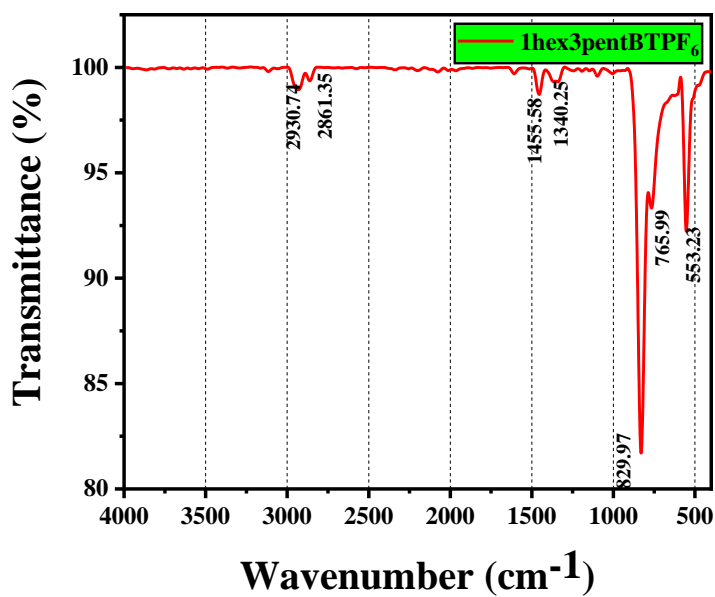

Figure S61. 1hex3pentBTPF<sub>6</sub>

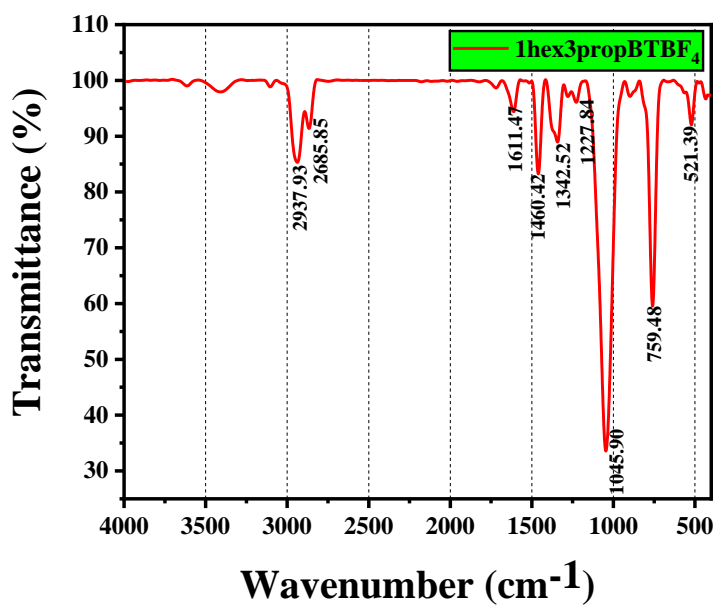

Figure S62. 1hex3propBTBF<sub>4</sub>

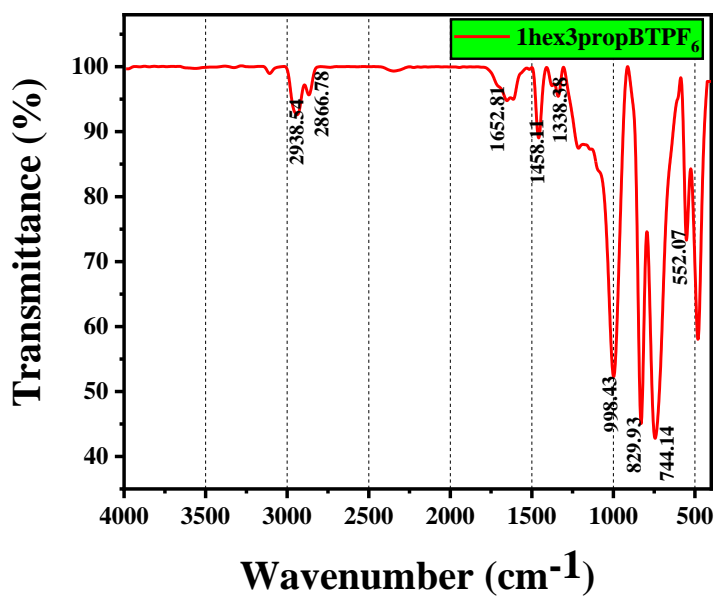

Figure S63. 1hex3pentBTPF<sub>6</sub>

#### S4. EIS

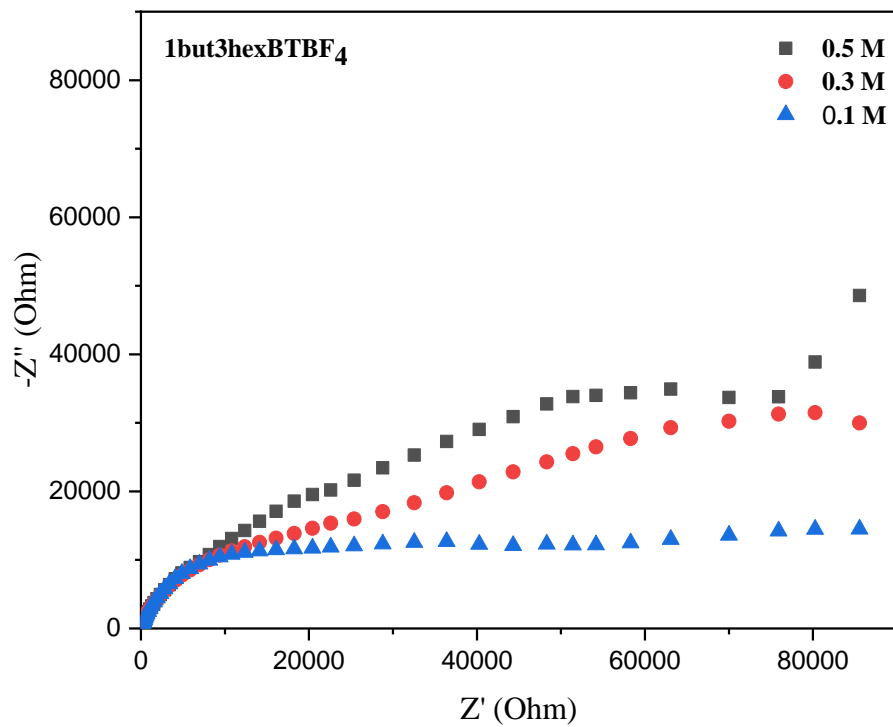

Figure S64. Impedance graph of 1but3hexBTBF<sub>4</sub> with 3 different concentration 0.5, 0.3, and 0.1 M

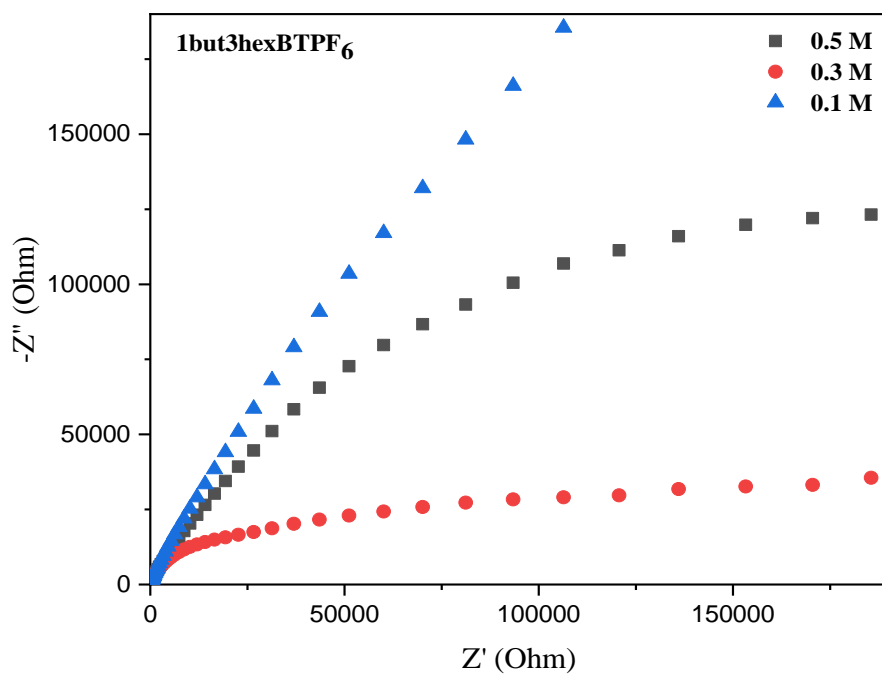

**Figure S65.** Impedance graph of 1but3hexBTPF<sub>6</sub> with 3 different concentration 0.5, 0.3, and 0.1 M

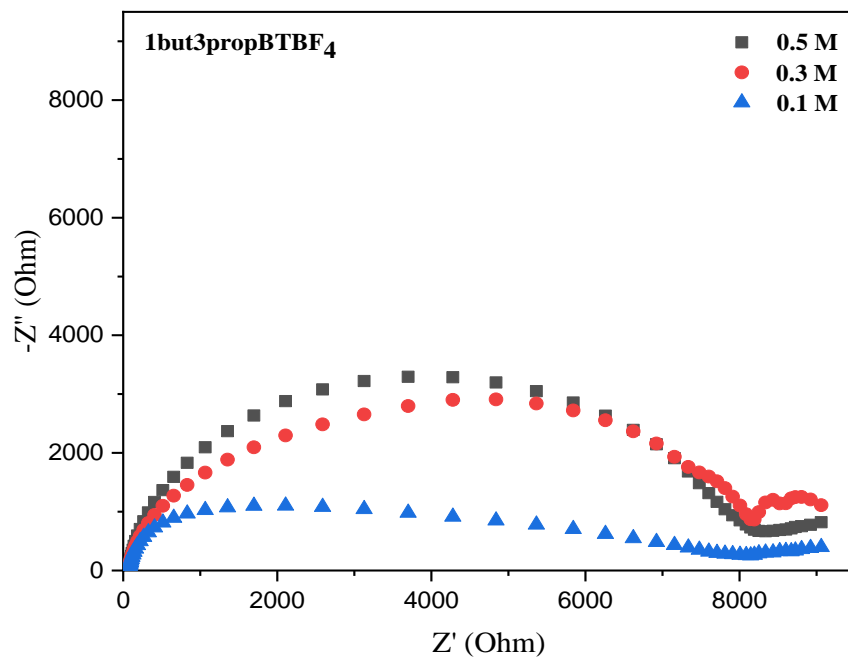

**Figure S66.** Impedance graph of 1but3propBTBF<sub>4</sub> with 3 different concentration 0.5, 0.3, and 0.1 M

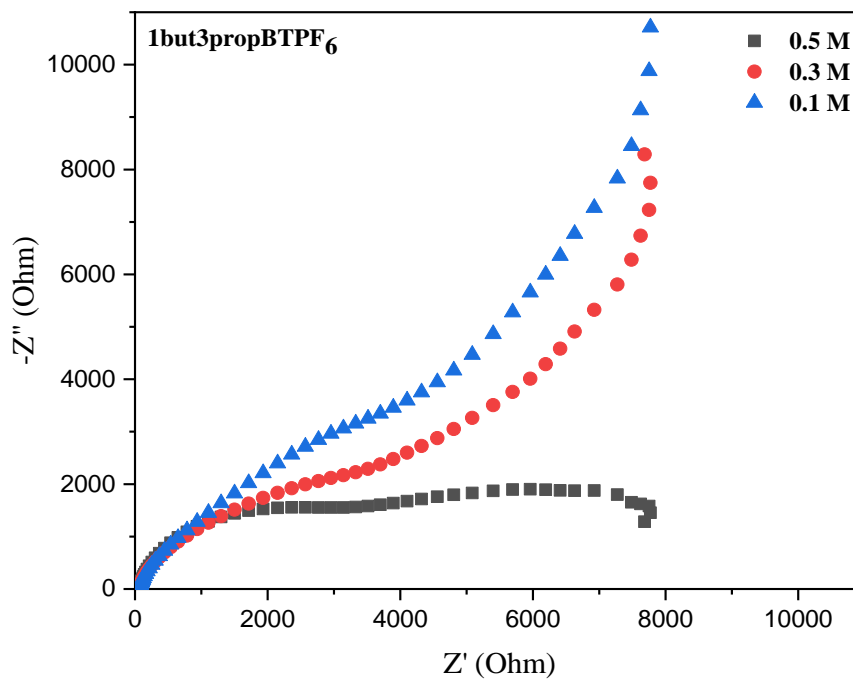

**Figure S67.** Impedance graph of 1but3propBTPF<sub>6</sub> with 3 different concentration 0.5, 0.3, and 0.1 M

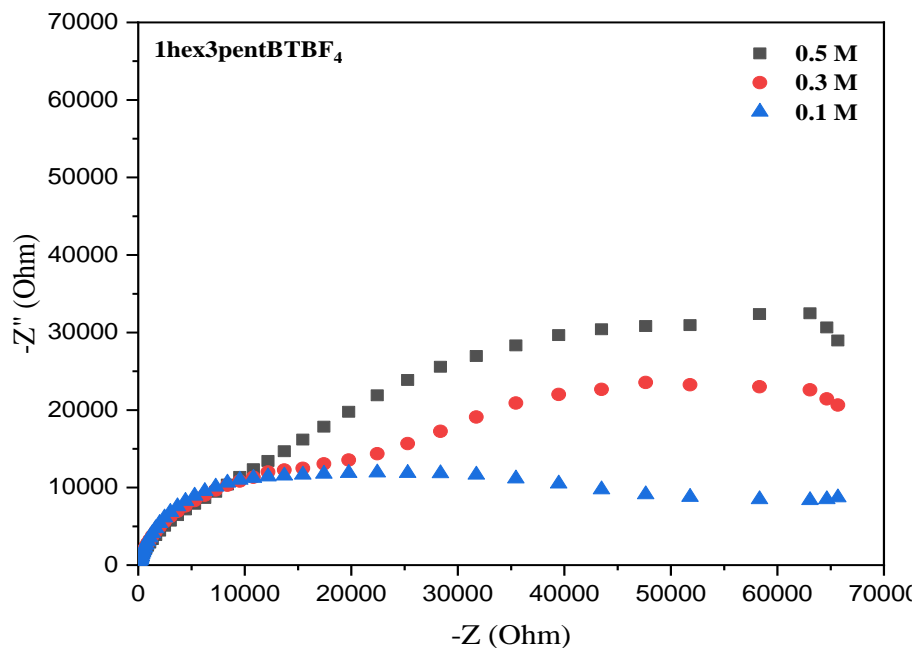

**Figure S68.** Impedance graph of 1hex3pentBTBF<sub>4</sub> with 3 different concentration 0.5, 0.3, and 0.1 M

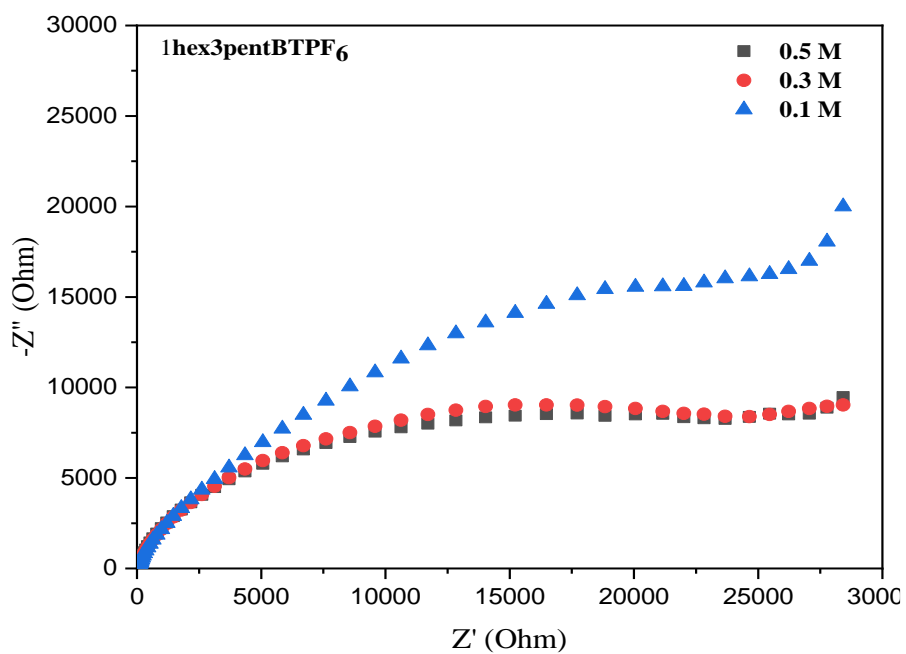

**Figure S69.** Impedance graph of 1hex3pentBTPF<sub>6</sub> with 3 different concentration 0.5, 0.3, and 0.1 M

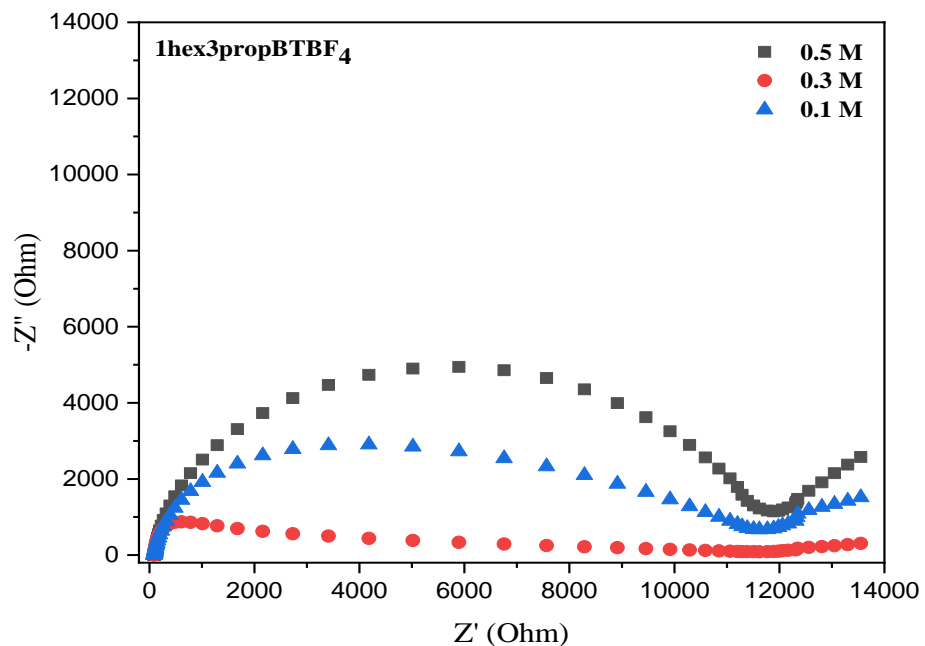

**Figure S70.** Impedance graph of 1hex3propBTBF<sub>4</sub> with 3 different concentration 0.5, 0.3, and 0.1 M

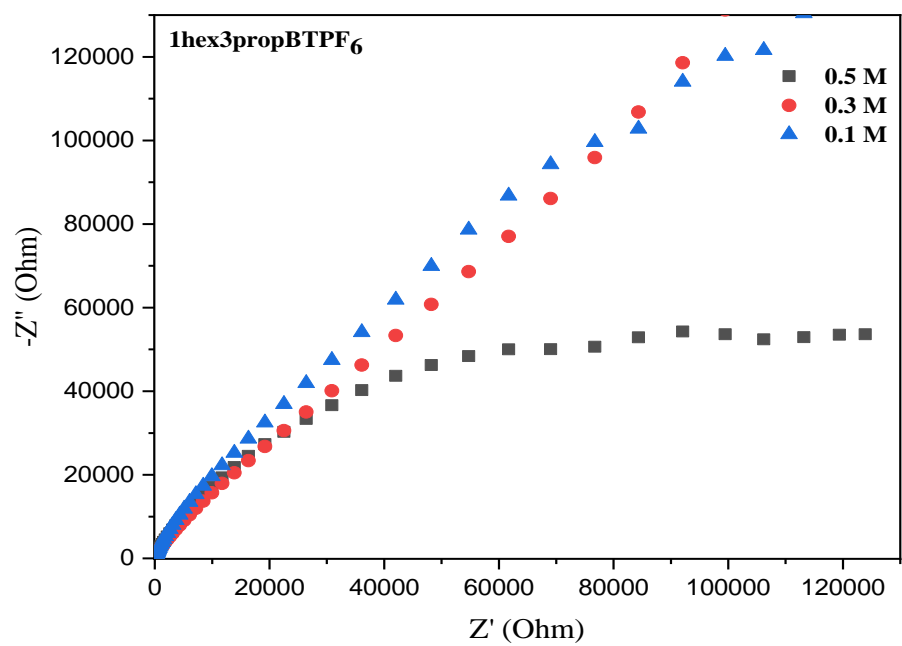

**Figure S71.** Impedance graph of 1hex3propBTPF<sub>6</sub> with 3 different concentration 0.5, 0.3, and 0.1 M

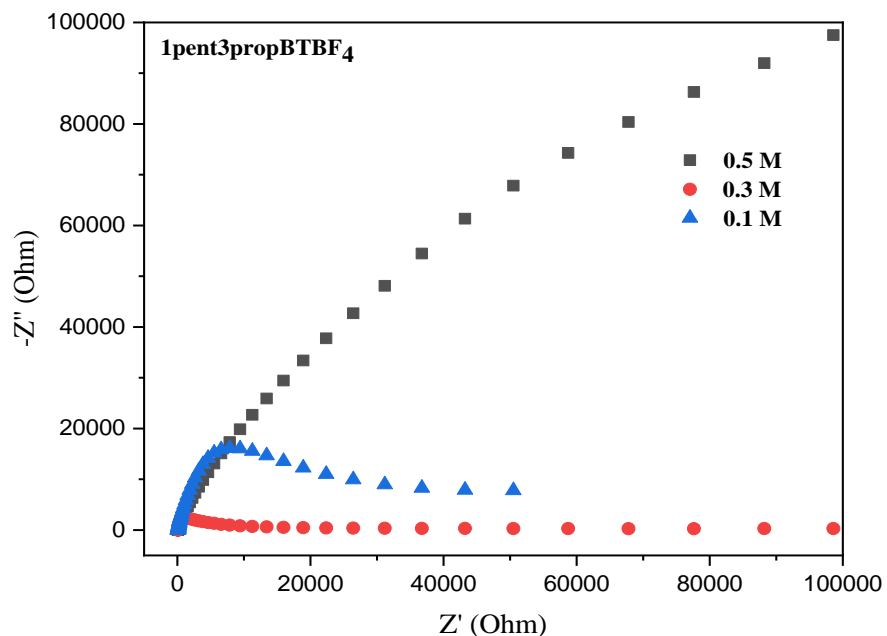

**Figure S72.** Impedance graph of 1pent3propBTBF<sub>4</sub> with 3 different concentration 0.5, 0.3, and 0.1 M

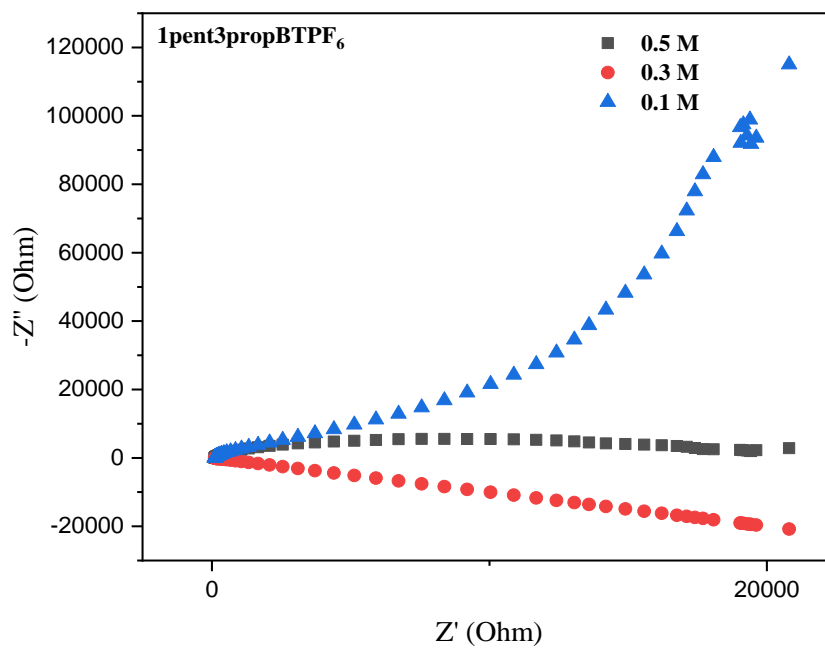

**Figure S73.** Impedance graph of 1pent3propBTPF<sub>6</sub> with 3 different concentration 0.5, 0.3, and 0.1 M

**Table S2.** Calculated resistance and conductance variation with different concentrations from EIS graphs

| Compound                   | Conc. (M) | R <sub>s</sub> (Ω) | Q <sub>dl</sub> | R <sub>ct</sub> (Ω) | R <sub>w</sub> (S s <sup>0.5</sup> ) | C <sub>f</sub> | R <sub>f</sub> (Ω) | Conductance (Ω <sup>-1</sup> ) |
|----------------------------|-----------|--------------------|-----------------|---------------------|--------------------------------------|----------------|--------------------|--------------------------------|
| 1but3propBTBF <sub>4</sub> | 0.5       | 170.8              | 0.0001888       | 5.63E+01            | 0.0001077                            | 7.84E-07       | 5180               | 0.017761989                    |
|                            | 0.3       | 89.01              | 1.59E-06        | 2677                | 0.002039                             | 0.0006506      | 274.1              | 0.000373552                    |
|                            | 0.1       | 72.19              | 1.44E-06        | 6331                | 0.000749                             | 1.54E-06       | 1553               | 0.00014637                     |
| 1but3propBTPF <sub>6</sub> | 0.5       | 67.98              | 2.01E-06        | 3359                | 0.0004473                            | 2.68E-05       | 2867               | 0.000297708                    |
|                            | 0.3       | 89.62              | 2.51E-06        | 3690                | 7.95E-05                             | 6.25E-05       | 1178               | 0.000271003                    |
|                            | 0.1       | 190.6              | 6.01E-06        | 6810                | 5.67E-05                             | 3.44E-06       | 1201               | 0.000146843                    |
| 1hex3propBTBF <sub>4</sub> | 0.5       | 107.1              | 8.94E-06        | 799.9               | 0.002167                             | 4.00E-07       | 1328               | 0.001250156                    |
|                            | 0.3       | 232.1              | 1.01E-05        | 1891                | 0.0004404                            | 5.19E-07       | 4742               | 0.000528821                    |
|                            | 0.1       | 90.27              | 4.90E-07        | 1.10E+04            | 0.000286                             | 1.55E-06       | 2.128              | 9.10E-05                       |
| 1hex3propBTPF <sub>6</sub> | 0.5       | 112.3              | 1.05E-06        | 1.19E+04            | 2.88E-06                             | 2.96E-06       | 804.1              | 8.38E-05                       |
|                            | 0.3       | 237.1              | 6.68E-07        | 1.26E+04            | 5.44E-06                             | 3.52E-06       | 8.08E+04           | 7.94E-05                       |
|                            | 0.1       | 85.27              | 1.45E-06        | 1.01E+05            | 1.70E-05                             | 1.17E-06       | 2575               | 9.90E-06                       |
| 1but3hexBTBF <sub>4</sub>  | 0.5       | 87.68              | 8.91E-07        | 1.48E+04            | 1.67E-05                             | 4.48E-06       | 2.72E+04           | 6.76E-05                       |
|                            | 0.3       | 99.75              | 9.00E-07        | 1.55E+04            | 3.58E-05                             | 9.34E-06       | 1.83E+04           | 6.45E-05                       |
|                            | 0.1       | 223.5              | 9.23E-07        | 1.98E+04            | 4.92E-05                             | 8.25E-06       | 1.17E+04           | 5.06E-05                       |
| 1but3hexBTPF <sub>6</sub>  | 0.5       | 88.56              | 6.24E-07        | 4069                | 5.92E-06                             | 3.23E-06       | 7.92E+04           | 0.000245761                    |
|                            | 0.3       | 93.56              | 8.65E-07        | 7246.37             | 3.78E-06                             | 2.22E-06       | 3.01E+04           | 0.000137893                    |
|                            | 0.1       | 239.7              | 1.21E-06        | 2.21E+05            | 1.95E-06                             | 1.49E-06       | 4101               | 4.52E-06                       |
| 1hex3pentBTBF <sub>4</sub> | 0.5       | 88.65              | 1.51E-06        | 1.33E+04            | 2.85E-05                             | 6.36E-06       | 3.34E+04           | 7.55E-05                       |
|                            | 0.3       | 111.7              | 1.33E-06        | 1.74E+04            | 5.68E-05                             | 9.33E-06       | 2.95E+04           | 5.74E-05                       |



|                             |     |       |           |          |           |           |          |             |
|-----------------------------|-----|-------|-----------|----------|-----------|-----------|----------|-------------|
|                             | 0.1 | 227.7 | 1.23E-06  | 1.84E+04 | 9.55E-05  | 7.11E-06  | 1.34E+04 | 5.44E-05    |
| 1hex3pentBTPF <sub>6</sub>  | 0.5 | 76.95 | 1.36E-06  | 8736     | 7.09E-05  | 5.65E-06  | 1.05E+04 | 0.000114469 |
|                             | 0.3 | 99.41 | 1.51E-06  | 9857     | 7.53E-05  | 6.04E-06  | 1.11E+04 | 0.000101451 |
|                             | 0.1 | 209.7 | 1.98E-06  | 2.94E+04 | 3.41E-05  | 0.7771    | 0.8198   | 3.40E-05    |
| 1but3pentBTBF <sub>4</sub>  | 0.5 | 122.9 | 0.0002705 | 97.23    | 0.01849   | 2.96E-07  | 142.7    | 0.010284891 |
|                             | 0.3 | 235.5 | 2.06E-05  | 250.2    | 0.006559  | 3.99E-07  | 283      | 0.003996803 |
|                             | 0.1 | 98.91 | 4.83E-07  | 4634     | 5.14E+12  | 0.0001403 | 339.2    | 0.000215796 |
| 1but3pentBTPF <sub>6</sub>  | 0.5 | 173.8 | 0.000399  | 210.7    | 5.19E-05  | 2.99E-07  | 3508     | 0.004746084 |
|                             | 0.3 | 137.4 | 5.98E-06  | 2500     | 0.001629  | 4.23E-07  | 2958     | 0.0004      |
|                             | 0.1 | 99.53 | 1.63E-06  | 1.69E+04 | 0.0003333 | 7.14E-07  | 4080     | 5.91E-05    |
| 1pent3propBTBF <sub>4</sub> | 0.5 | 127.3 | 3.44E-06  | 3316     | 0.001627  | 4.98E-07  | 2965     | 0.000301568 |
|                             | 0.3 | 95.24 | 9.97E-07  | 1.83E+04 | 5.50E-06  | 2.99E-06  | 6.79E+04 | 5.46E-05    |
|                             | 0.1 | 88.67 | 8.65E-06  | 2.63E+04 | 4.90E-06  | 4.45E-06  | 7.99E+04 | 3.79E-05    |
| 1pent3propBTPF <sub>6</sub> | 0.5 | 102.4 | 6.19E-07  | 9261     | 0.0002605 | 3.83E-06  | 7589     | 0.00010798  |
|                             | 0.3 | 147.3 | 2.64E-06  | 1.18E+04 | 0.0002172 | 4.89E-07  | 4842     | 8.45E-05    |
|                             | 0.1 | 418.8 | 1.27E-06  | 1.77E+05 | 9.95E-06  | 1.12E-06  | 8254     | 5.64E-06    |

## S5. Cyclic Voltammogram

Cyclic voltammograms of asymmetrically substituted 1,3-dialkyl-1,2,3-benzotriazolium salts with 0.5, 0.3, and 0.1 M concentrations in acetonitrile recorded at different scan rates, with platinum disc as working electrode and Pt wire as counter and reference electrodes.

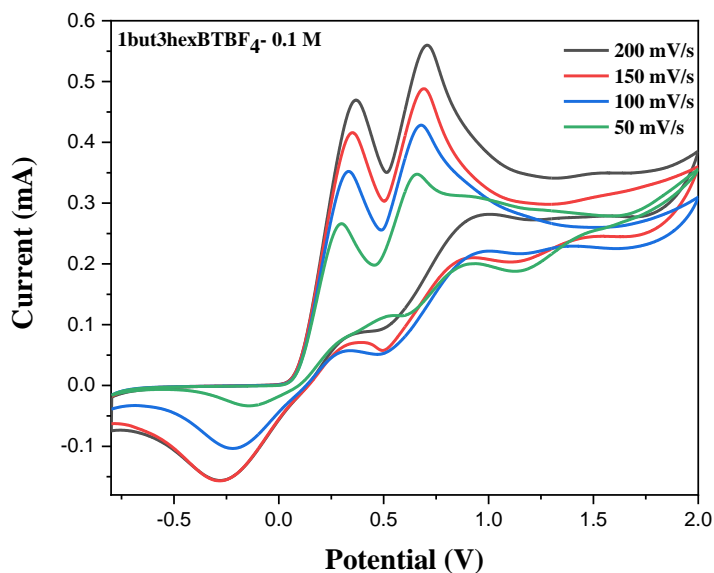

**Figure S74.** Cyclic Voltammogram of 1but3hexBTBF<sub>4</sub> with concentration 0.1 M and 4 different scan rates 200 mV/s, 150 mV/s, 100 mV/s and 50 mV/s

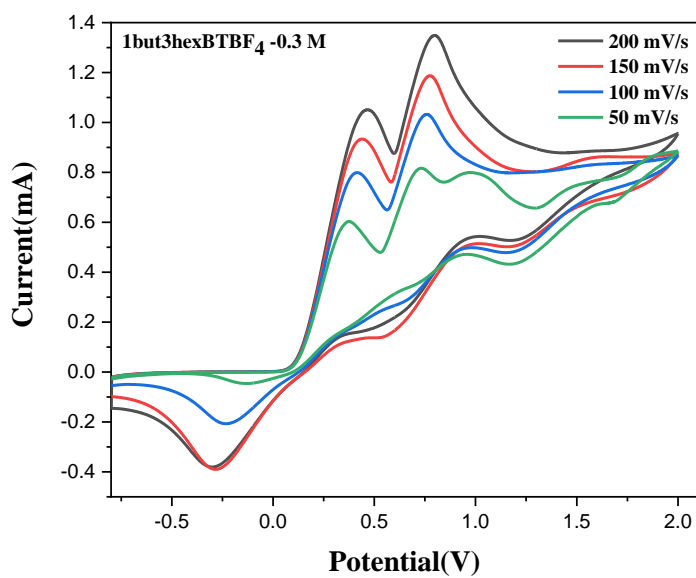

**Figure S75.** Cyclic Voltammogram of 1but3hexBTBF<sub>4</sub> with concentration 0.3 M and 4 different scan rates 200 mV/s, 150 mV/s, 100 mV/s and 50 mV/s

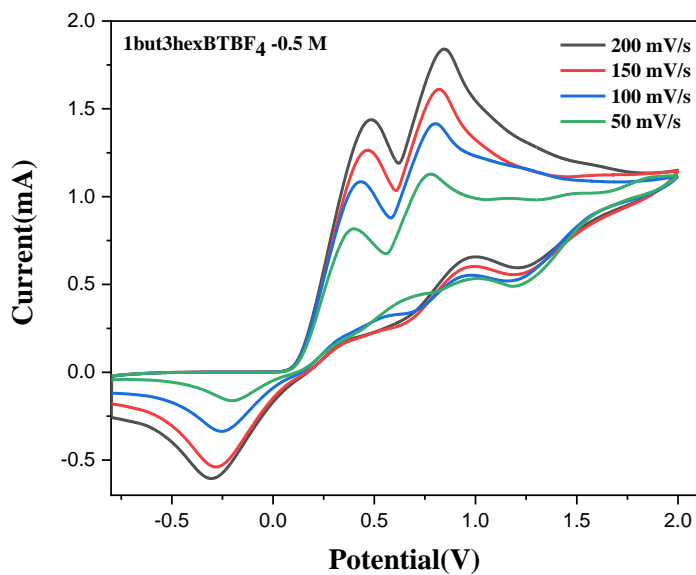

**Figure S76.** Cyclic Voltammogram of 1but3hexBTBF<sub>4</sub> with concentration 0.5 M and 4 different scan rates 200 mV/s, 150 mV/s, 100 mV/s and 50 mV/s

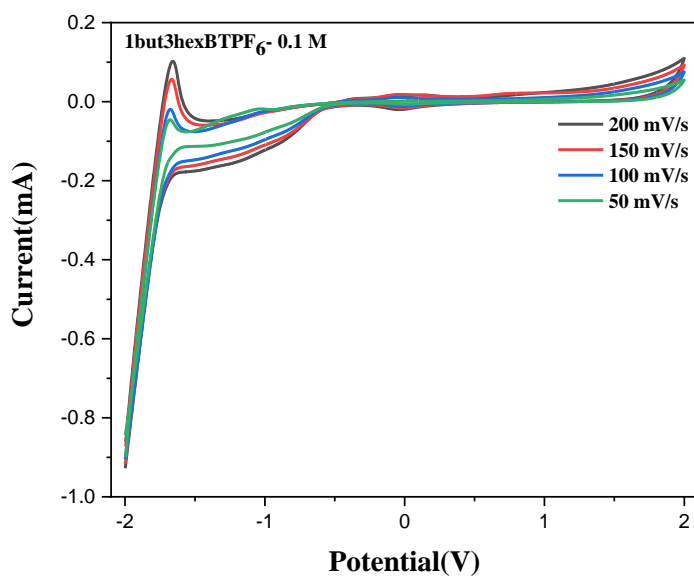

**Figure S77.** Cyclic Voltammogram of 1but3hexBTPF<sub>6</sub> with concentration 0.1 M and 4 different scan rates 200 mV/s, 150 mV/s, 100 mV/s and 50 mV/s

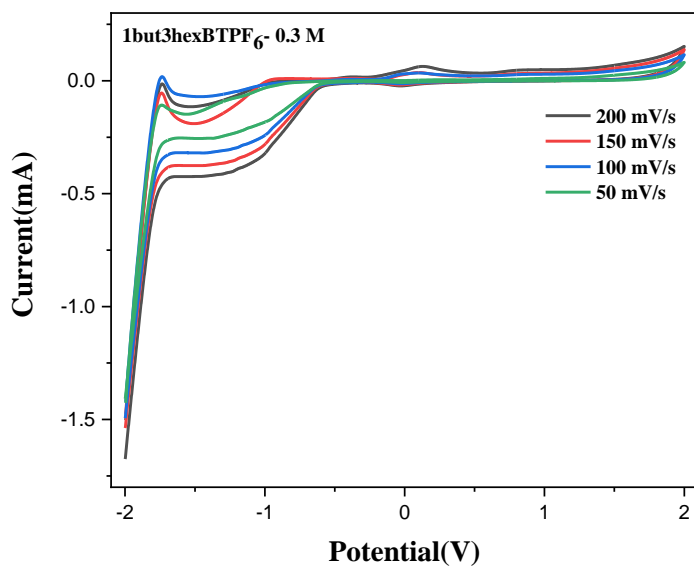

**Figure S78.** Cyclic Voltammogram of 1 but3hexBTPF<sub>6</sub> with concentration 0.3 M and 4 different scan rates 200 mV/s, 150 mV/s, 100 mV/s and 50 mV/s

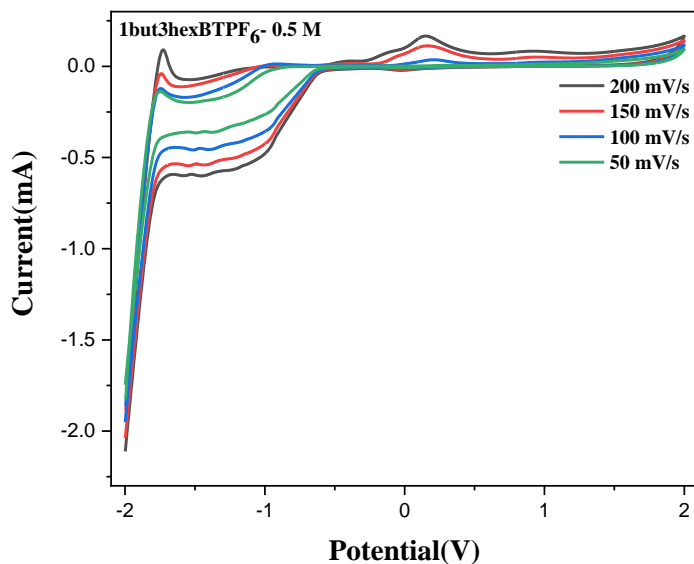

**Figure S79.** Voltammogram of 1but3hexBTPF<sub>6</sub> with concentration 0.5 M and 4 different scan rates 200 mV/s, 150 mV/s, 100 mV/s and 50 mV/s

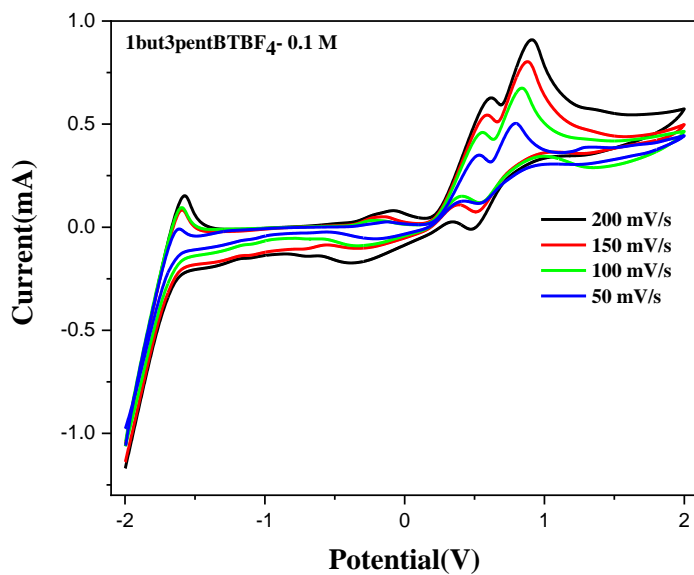

**Figure S80.** Cyclic Voltammogram of 1but3pentBTBF<sub>4</sub> with concentration 0.1 M and 4 different scan rates 200 mV/s, 150 mV/s, 100 mV/s and 50 mV/s

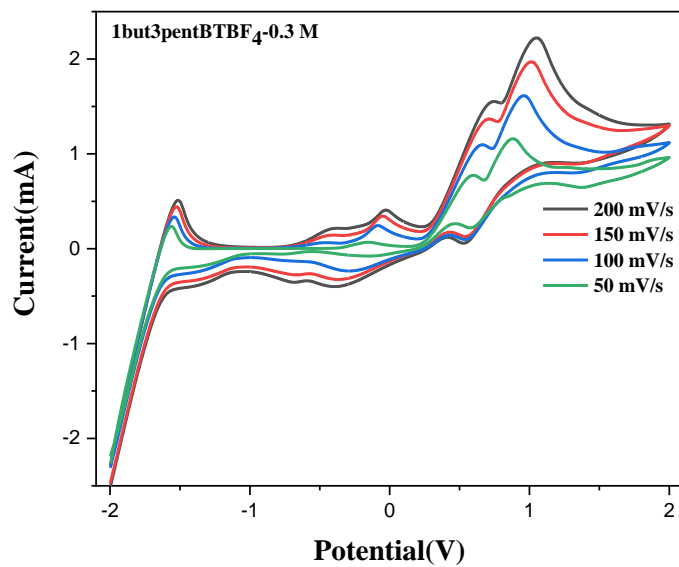

**Figure S81.** Cyclic Voltammogram of 1but3pentBTBF<sub>4</sub> with concentration 0.3 M and 4 different scan rates 200 mV/s, 150 mV/s, 100 mV/s and 50 mV/s

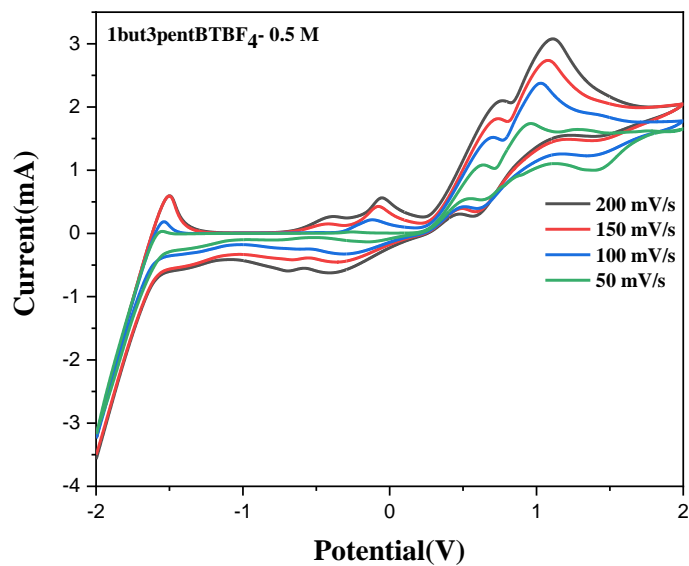

**Figure S82.** Cyclic Voltammogram of 1but3pentBTBF<sub>4</sub> with concentration 0.5 M and 4 different scan rates 200 mV/s, 150 mV/s, 100 mV/s and 50 mV/s

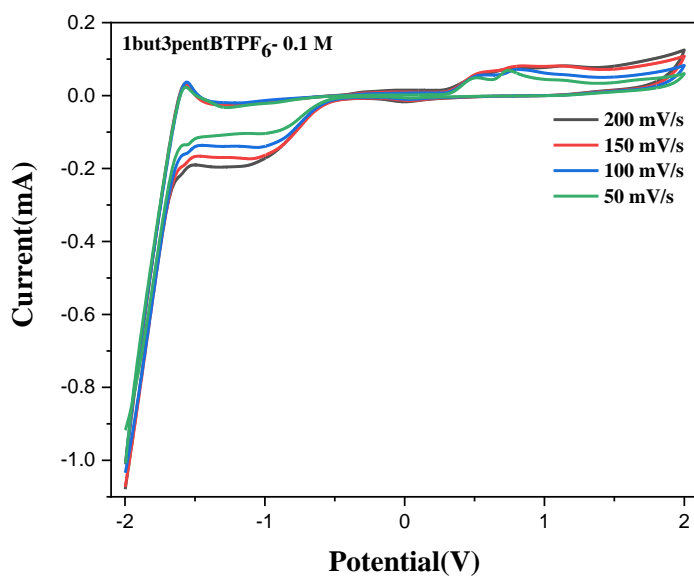

**Figure S83.** Cyclic Voltammogram of 1 but3pentBTPF<sub>6</sub> with concentration 0.1 M and 4 different scan rates 200 mV/s, 150 mV/s, 100 mV/s and 50 mV/s

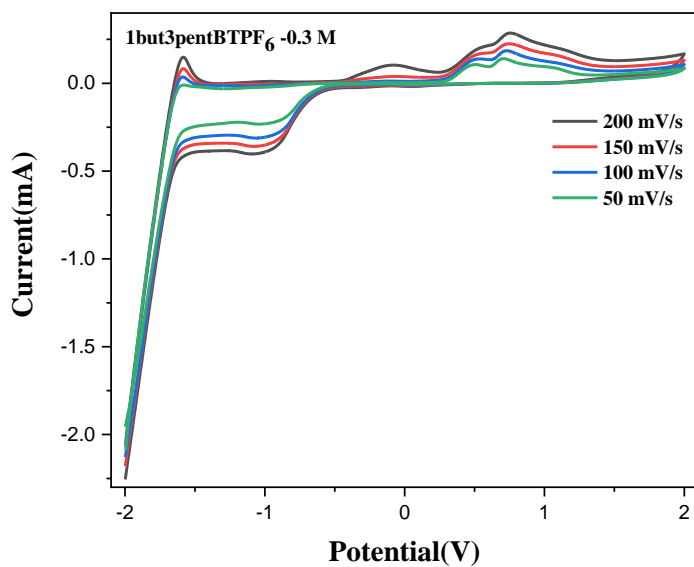

**Figure S84.** Cyclic Voltammogram of 1but3pentBTPF<sub>6</sub> with concentration 0.3 M and 4 different scan rates 200 mV/s, 150 mV/s, 100 mV/s and 50 mV/s

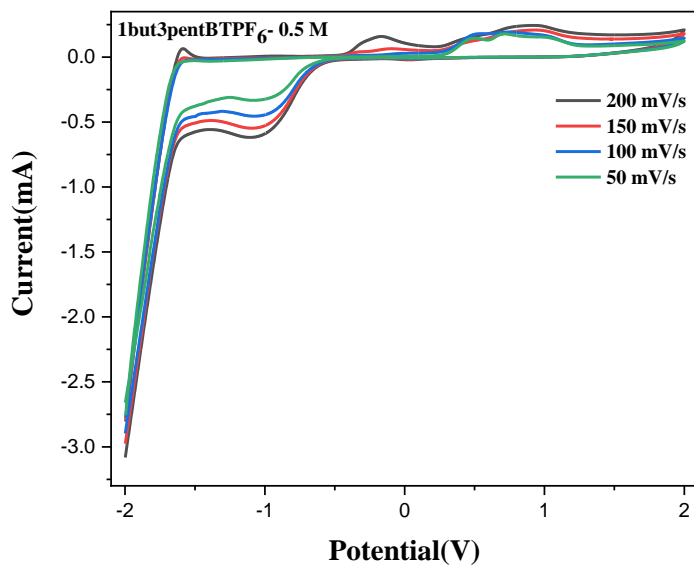

**Figure S85.** Cyclic Voltammogram of 1but3pentBTPF<sub>6</sub> with concentration 0.5 M and 4 different scan rates 200 mV/s, 150 mV/s, 100 mV/s and 50 mV/s

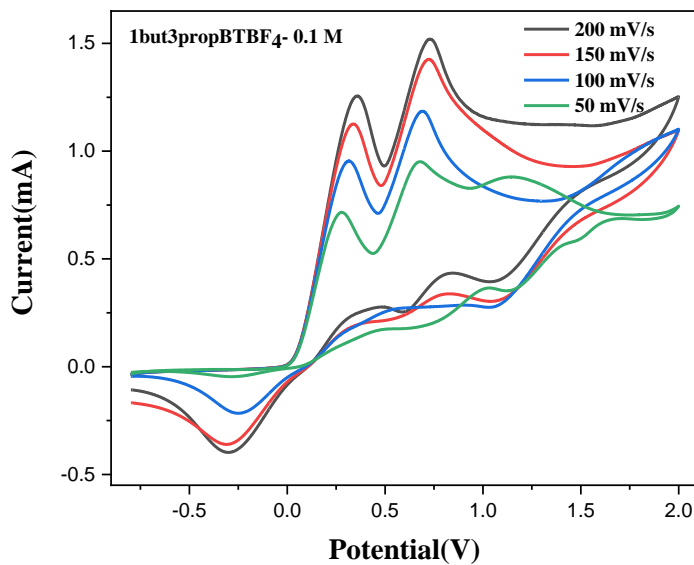

**Figure S86.** Cyclic Voltammogram of 1but3propBTBF<sub>4</sub> with concentration 0.1 M and 4 different scan rates 200 mV/s, 150 mV/s, 100 mV/s and 50 mV/s



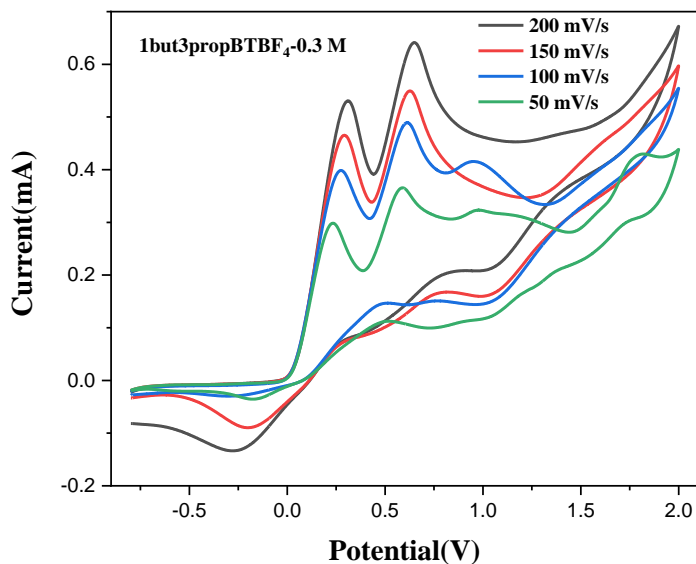

**Figure S87.** Cyclic Voltammogram of 1but3propBTBF<sub>4</sub> with concentration 0.3 M and 4 different scan rates 200 mV/s, 150 mV/s, 100 mV/s and 50 mV/s

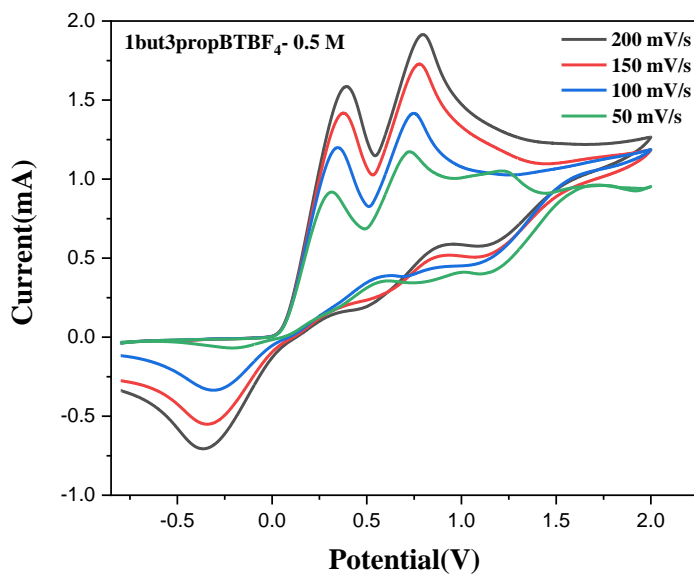

**Figure S88.** Cyclic Voltammogram of 1but3propBTBF<sub>4</sub> with concentration 0.5 M and 4 different scan rates 200 mV/s, 150 mV/s, 100 mV/s and 50 mV/s

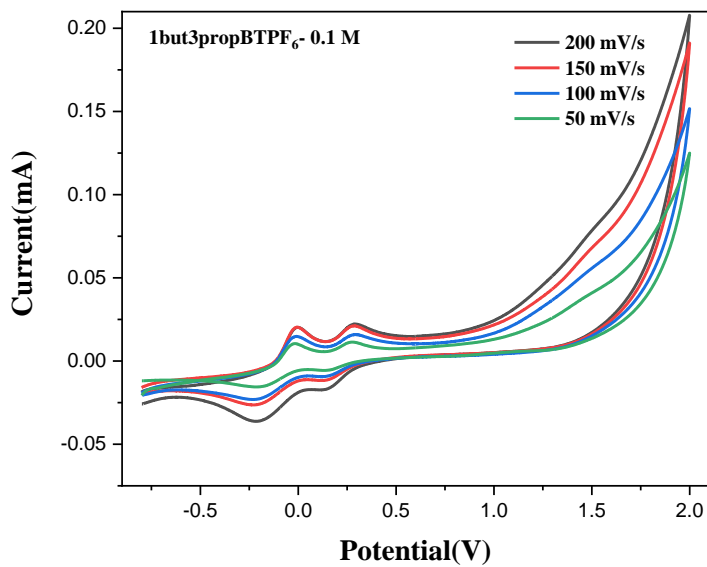

**Figure S89.** Cyclic Voltammogram of 1but3propBTPF<sub>6</sub> with concentration 0.1 M and 4 different scan rates 200 mV/s, 150 mV/s, 100 mV/s and 50 mV/s

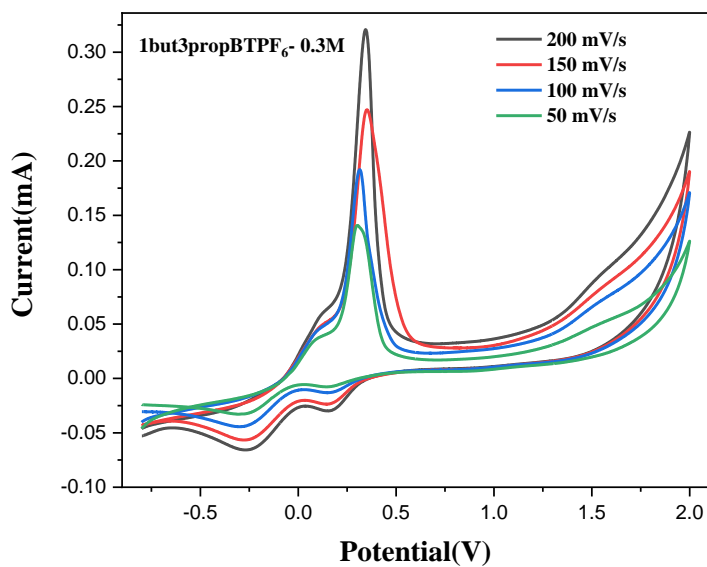

**Figure S90.** Cyclic Voltammogram of 1but3propBTPF<sub>6</sub> with concentration 0.3 M and 4 different scan rates 200 mV/s, 150 mV/s, 100 mV/s and 50 mV/s

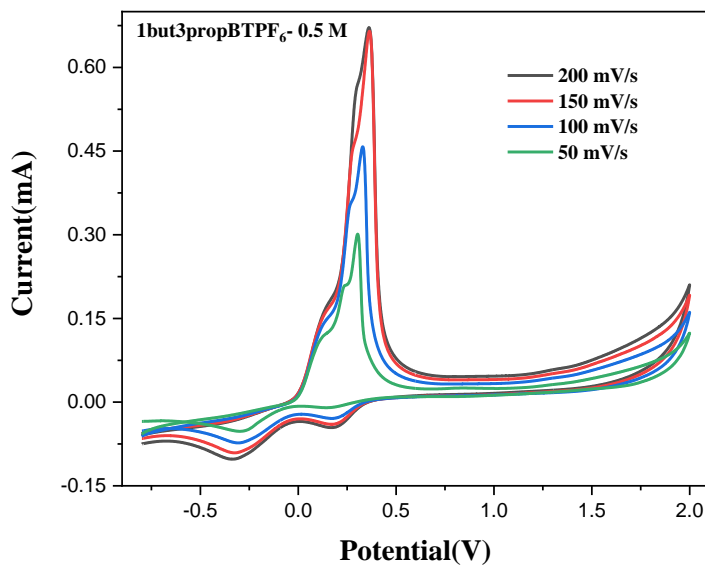

**Figure S91.** Cyclic Voltammogram of 1 but3propBTPF<sub>6</sub> with concentration 0.5 M and 4 different scan rates 200 mV/s, 150 mV/s, 100 mV/s and 50 mV/s

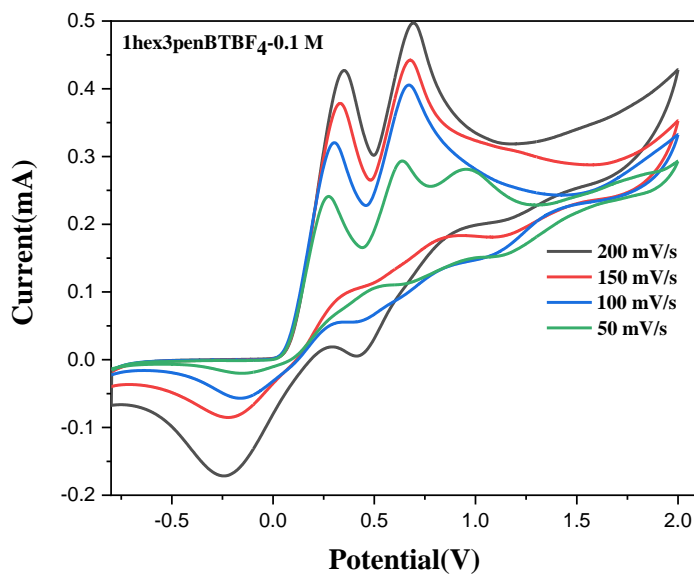

**Figure S92.** Cyclic Voltammogram of 1hex3pentBTBF<sub>4</sub> with concentration 0.1 M and 4 different scan rates 200 mV/s, 150 mV/s, 100 mV/s and 50 mV/s

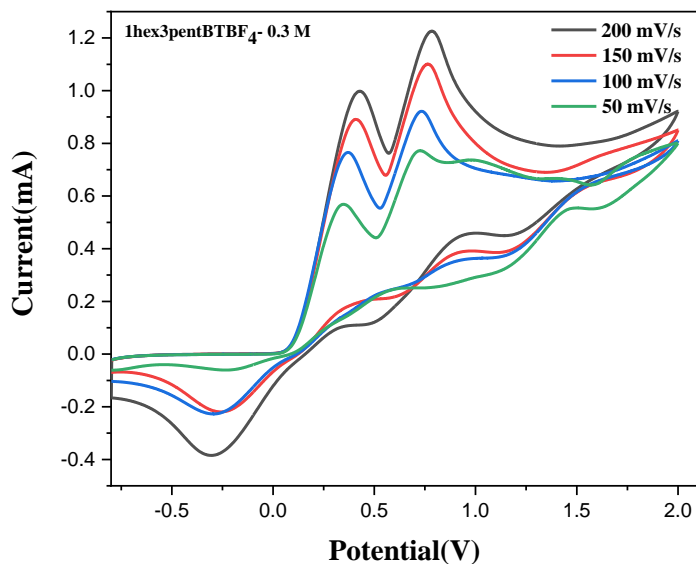

**Figure S93.** Cyclic Voltammogram of 1hex3pentBTBF<sub>4</sub> with concentration 0.3 M and 4 different scan rates 200 mV/s, 150 mV/s, 100 mV/s and 50 mV/s

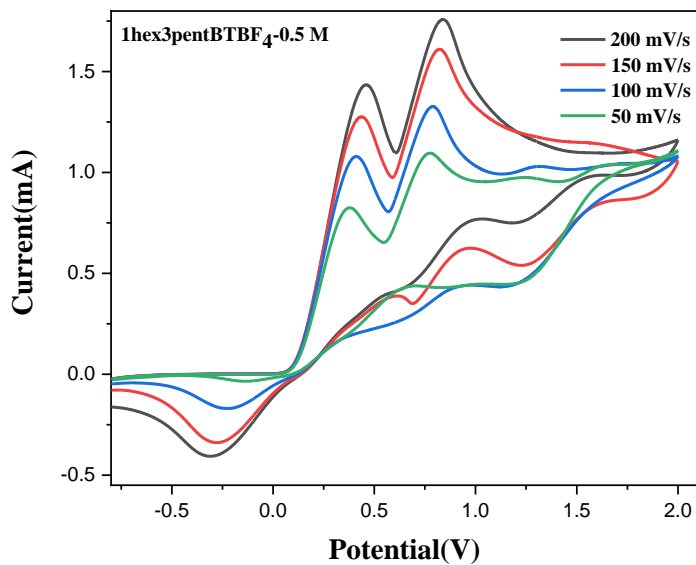

**Figure S94.** Cyclic Voltammogram of 1hex3pentBTBF<sub>4</sub> with concentration 0.5 M and 4 different scan rates 200 mV/s, 150 mV/s, 100 mV/s and 50 mV/s

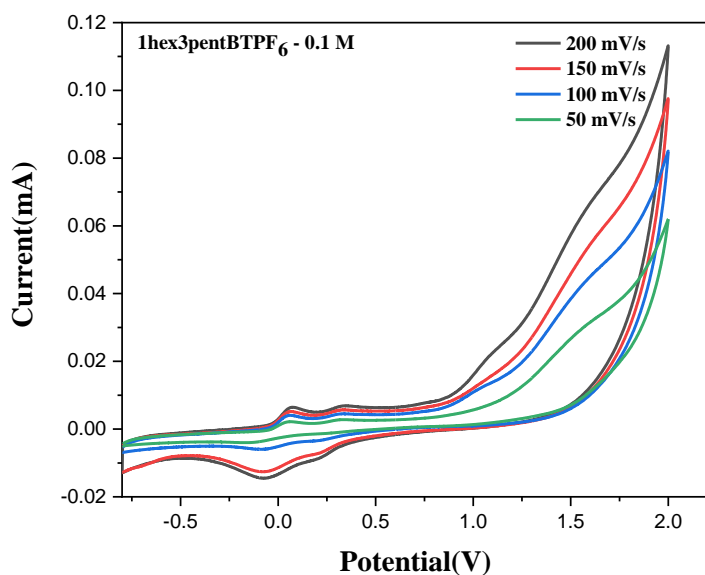

**Figure S95.** Cyclic Voltammogram of 1hex3pentBTPF<sub>6</sub> with concentration 0.1 M and 4 different scan rates 200 mV/s, 150 mV/s, 100 mV/s and 50 mV/s

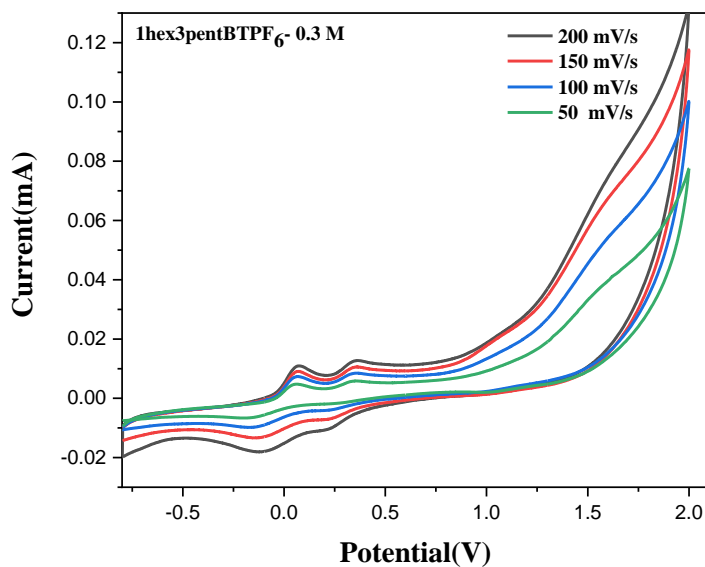

**Figure S96.** Cyclic Voltammogram of 1hex3pentBTPF<sub>6</sub> with concentration 0.3 M and 4 different scan rates 200 mV/s, 150 mV/s, 100 mV/s and 50 mV/s

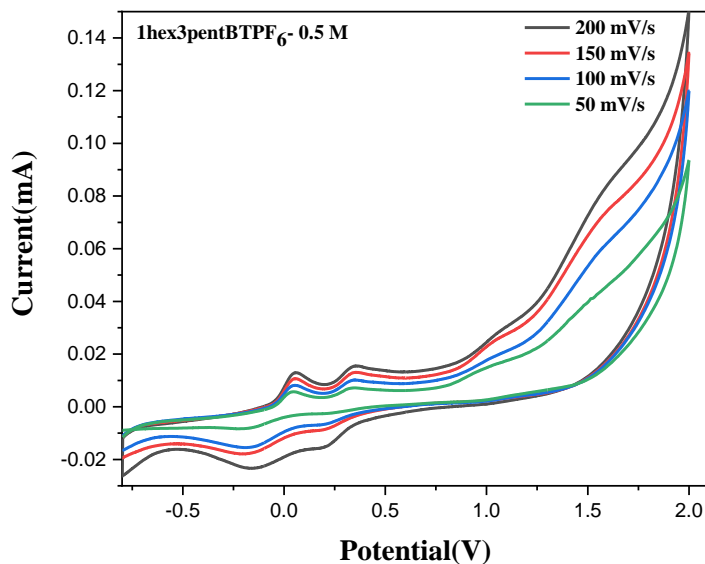

**Figure S97.** Cyclic Voltammogram of 1hex3pentBTPF<sub>6</sub> with concentration 0.5 M and 4 different scan rates 200 mV/s, 150 mV/s, 100 mV/s and 50 mV/s

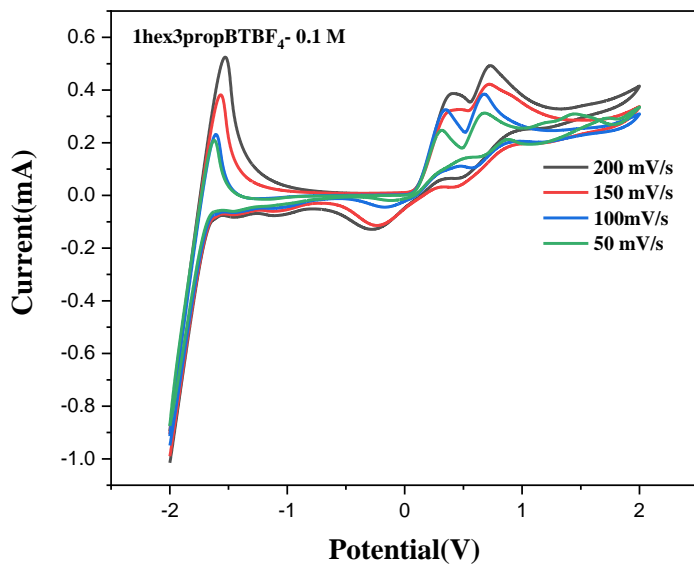

**Figure S98.** Cyclic Voltammogram of 1hex3propBTBF<sub>4</sub> with concentration 0.1 M and 4 different scan rates 200 mV/s, 150 mV/s, 100 mV/s and 50 mV/s

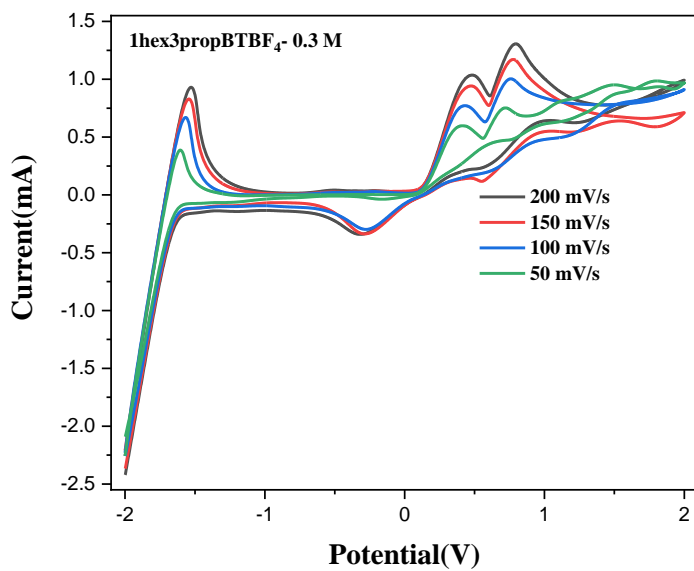

**Figure S99.** Cyclic Voltammogram of 1hex3propBTBF<sub>4</sub> with concentration 0.3 M and 4 different scan rates 200 mV/s, 150 mV/s, 100 mV/s and 50 mV/s

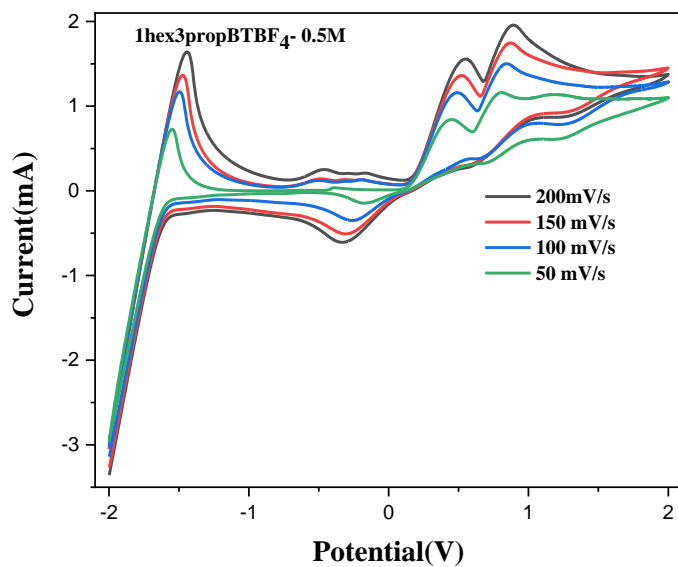

**Figure S100.** Cyclic Voltammogram of 1hex3propBTBF<sub>4</sub> with concentration 0.5 M and 4 different scan rates 200 mV/s, 150 mV/s, 100 mV/s and 50 mV/s

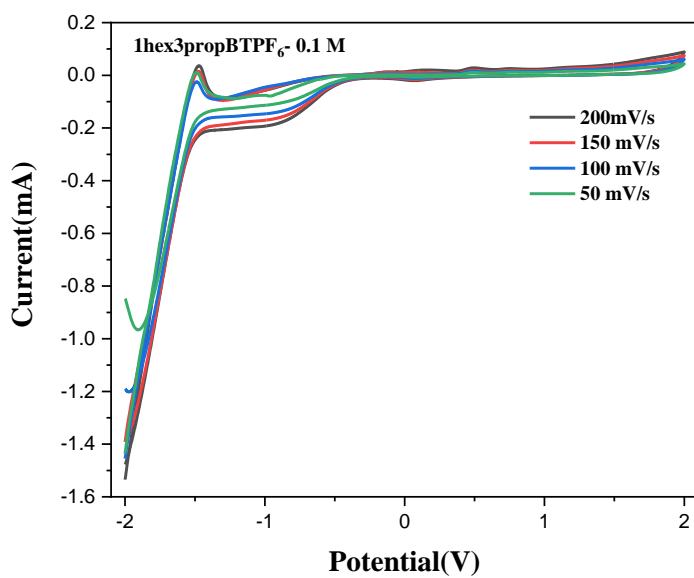

**Figure S101.** Cyclic Voltammogram of 1hex3propBTPF<sub>6</sub> with concentration 0.1 M and 4 different scan rates 200 mV/s, 150 mV/s, 100 mV/s and 50 mV/s

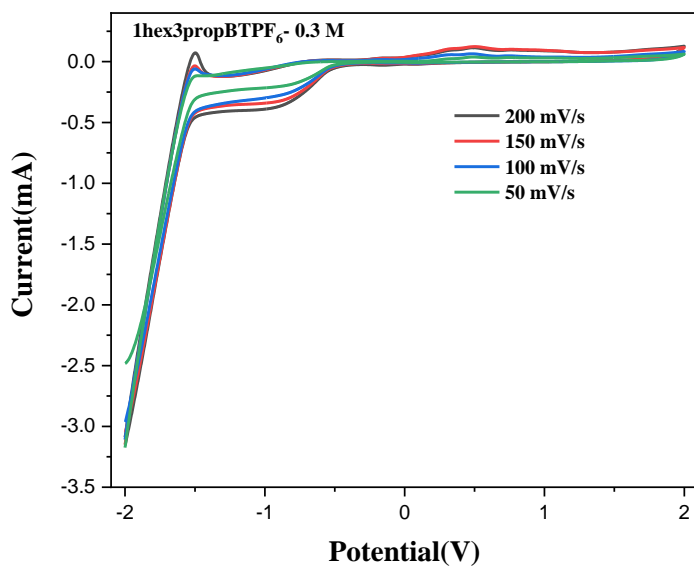

**Figure S102.** Cyclic Voltammogram of 1hex3propBTPF<sub>6</sub> with concentration 0.3 M and 4 different scan rates 200 mV/s, 150 mV/s, 100 mV/s and 50 mV/s



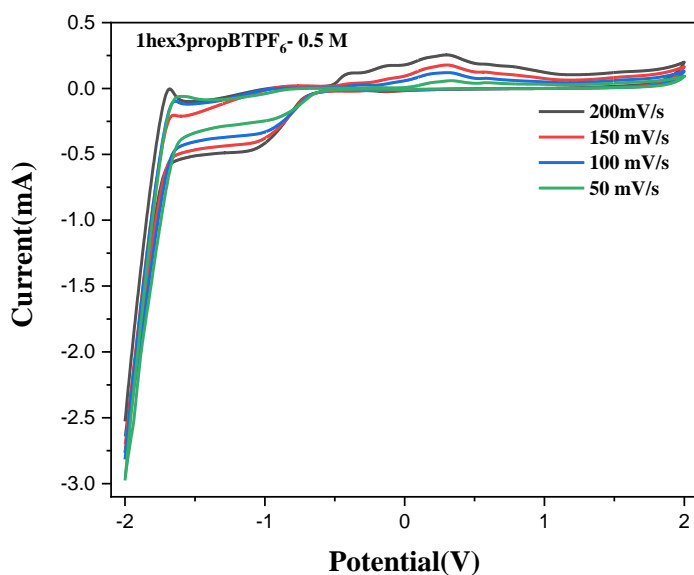

**Figure S103.** Cyclic Voltammogram of 1hex3propBTPF<sub>6</sub> with concentration 0.5 M and 4 different scan rates 200 mV/s, 150 mV/s, 100 mV/s and 50 mV/s

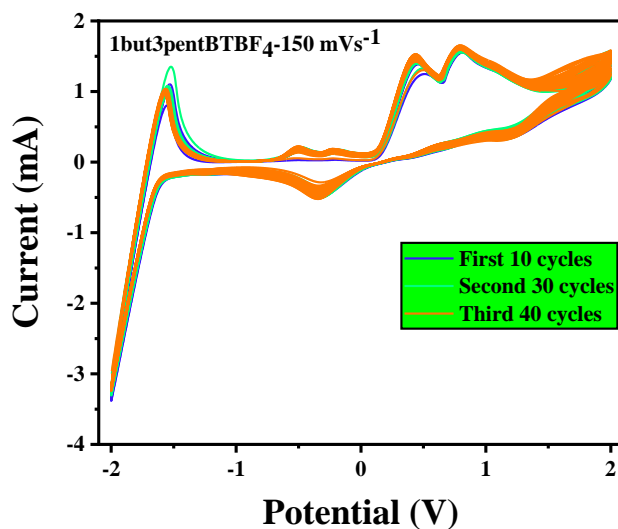

**Figure S104.** Cyclic stability of the asymmetrically substituted 1-butyl-3-pentyl-1,2,3-benzotriazolium tetrafluoroborate in acetonitrile solution of 0.5 M concentration with cyclic voltammetry recorded with platinum disc as working electrode and platinum wire as counter and reference electrodes, at a scan rate of 150 mV/s

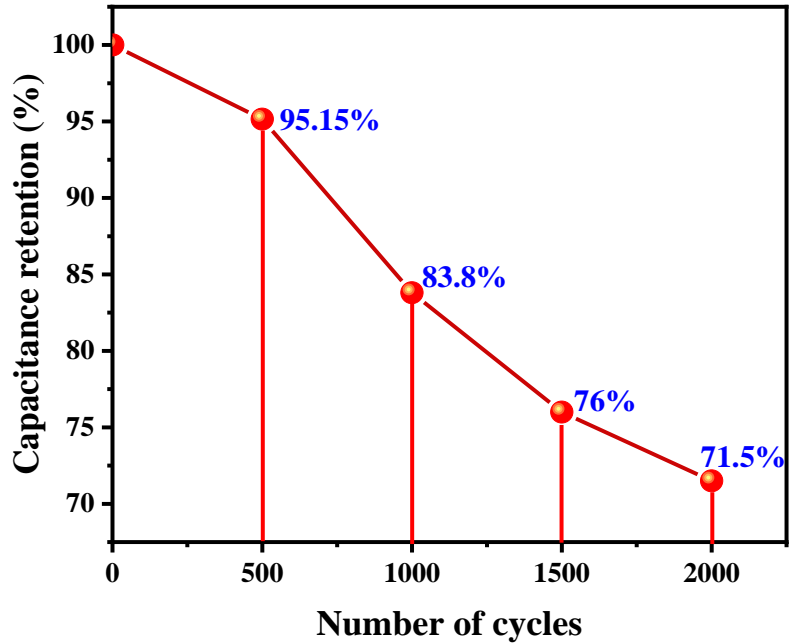

**Figure S105.** % capacitance retention with varying cycles

### S6. Equations for calculating supercapacitor performance

$$\text{Specific capacitance (CV)} = \frac{\int I dV}{2\Delta V v m} \dots\dots\dots (4)$$

$$\text{Specific capacitance (GCD)} = \frac{IX\Delta t}{\Delta V X m} \dots\dots\dots (5)$$

$$E = \frac{C \times V^2}{7200} \dots\dots\dots (6)$$

$$P = \frac{E}{\Delta t} \times 3600 \dots\dots\dots (7)$$

Where,  $\int I dV$  – integral area,  $\Delta V$  – potential window,  $v$ - scan rate,  $m$  – mass of active material,  $I$  – discharge current, and  $\Delta t$  the discharging time.

### Table S3. Comparison table with previously reported works

| Electrode                    | Electrolyte                                                                               | Working window | Capacitance            | Reference no. |
|------------------------------|-------------------------------------------------------------------------------------------|----------------|------------------------|---------------|
| AC                           | PVdF-HFP/[PMpyr][NTf <sub>2</sub> ]                                                       | 0-2V           | 93.72 Fg <sup>-1</sup> | [1]           |
| AC                           | PVdF/PVAc/BMIMBF <sub>4</sub>                                                             | 0-3V           | 93.3 Fg <sup>-1</sup>  | [2]           |
| Porous carbon                | PVP/PVdF-HFP/Mg(CF <sub>3</sub> SO <sub>3</sub> ) <sub>2</sub> /[bdmim][BF <sub>4</sub> ] | 0-0.8V         | 133 Fg <sup>-1</sup>   | [3]           |
| Graphene                     | Polyacrylonitrile (PAN)/[BMIM][TFSI]                                                      | 0-3V           | 108 Fg <sup>-1</sup>   | [4]           |
| f-MWCNTs                     | PVdF-HFP/EMImFAP/LiPF <sub>6</sub>                                                        | 4V(-2 to 2V)   | 127 Fg <sup>-1</sup>   | [5]           |
| Porous carbon                | PVdF-HFP/MgTr                                                                             | 0-1V           | 150 Fg <sup>-1</sup>   | [6]           |
| Graphite-PTFE (present work) | PVDF-HFP/1but3pentBTBF <sub>4</sub>                                                       | 0-6V           | 8.85 Fg <sup>-1</sup>  |               |

## References

- [1] R. Muchakayala, S. Song, J. Wang, Y. Fan, M. Benggeppagari, J. Chen, M. Tan, Development and supercapacitor application of ionic liquid-incorporated gel polymer electrolyte films, *J. Ind. Eng. Chem.* 59 (2018) 79–89. <https://doi.org/10.1016/j.jiec.2017.10.009>.
- [2] L. Yang, J. Hu, G. Lei, H. Liu, Ionic liquid-gelled polyvinylidene fluoride/polyvinyl acetate polymer electrolyte for solid supercapacitor, *Chem. Eng. J.* 258 (2014) 320–326. <https://doi.org/10.1016/j.cej.2014.05.149>.
- [3] S.N. Syahidah, S.R. Majid, Super-capacitive electro-chemical performance of polymer blend gel polymer electrolyte (GPE) in carbon-based electrical double-layer capacitors, *Electrochim. Acta.*

112 (2013) 678–685. <https://doi.org/10.1016/j.electacta.2013.09.008>.

- [4] G.P. Pandey, T. Liu, C. Hancock, Y. Li, X.S. Sun, J. Li, Thermostable gel polymer electrolyte based on succinonitrile and ionic liquid for high-performance solid-state supercapacitors, *J. Power Sources*. 328 (2016) 510–519. <https://doi.org/10.1016/j.jpowsour.2016.08.032>.
- [5] G.P. Pandey, S.A. Hashmi, Solid-state supercapacitors with ionic liquid based gel polymer electrolyte: Effect of lithium salt addition, *J. Power Sources*. 243 (2013) 211–218. <https://doi.org/10.1016/j.jpowsour.2013.05.183>.
- [6] S.N. Syahidah, S.R. Majid, Ionic liquid-based polymer gel electrolytes for symmetrical solid-state electrical double layer capacitor operated at different operating voltages, *Electrochim. Acta*. 175 (2015) 184–192. <https://doi.org/10.1016/j.electacta.2015.02.215>.
